# Supplementary material for: An E3 ubiquitin-proteasome gene signature for predicting prognosis in patients with pancreatic cancer
Source: Front Immunol. 2024 Jan 18;14:1332626. doi: 10.3389/fimmu.2023.1332626 (PMC10830689; doi:10.3389/fimmu.2023.1332626)
Supplement: Supplementary file 1 [file DataSheet_1.xlsx]

## Sheet: proteinGroups
Protein IDs	Majority protein IDs	Protein names	Gene names	Fasta headers	Number of proteins	Peptides	Razor + unique peptides	Unique peptides	Peptides NC	Peptides WDR37	Razor + unique peptides NC	Razor + unique peptides WDR37	Unique peptides NC	Unique peptides WDR37	Sequence coverage [%]	Unique + razor sequence coverage [%]	Unique sequence coverage [%]	Mol. weight [kDa]	Sequence length	Q-value	Score	Sequence coverage NC [%]	Sequence coverage WDR37 [%]	Intensity NC	Intensity WDR37	iBAQ NC	iBAQ WDR37	LFQ intensity NC	LFQ intensity WDR37	MS/MS count NC	MS/MS count WDR37	MS/MS count	id	Peptide IDs	Peptide is razor	Mod. peptide IDs	Evidence IDs	MS/MS IDs	Best MS/MS	GlyGly (K) site IDs	Oxidation (M) site IDs	GlyGly (K) site positions	Oxidation (M) site positions
A0A3B3IT47	A0A3B3IT47;Q9Y2I8;E7EQ49;A0A087WTQ2	WD repeat-containing protein 37	WDR37	tr|A0A3B3IT47|A0A3B3IT47_HUMAN WD repeat-containing protein 37 OS=Homo sapiens OX=9606 GN=WDR37 PE=1 SV=1;sp|Q9Y2I8|WDR37_HUMAN WD repeat-containing protein 37 OS=Homo sapiens OX=9606 GN=WDR37 PE=1 SV=2;tr|E7EQ49|E7EQ49_HUMAN WD repeat-containing protein 3	5	14	14	14	0	14	0	14	0	14	23.4	23.4	23.4	63.833	576	0	323.31	0	23.4	0	592160000	0	20419000	0	882270000	0	24	24	203	464;465;616;1379;1718;1765;1851;2206;2625;2933;3014;3078;3135;3584	True;True;True;True;True;True;True;True;True;True;True;True;True;True	474;475;630;1398;1756;1806;1893;2251;2675;2993;3075;3140;3197;3658	1233;1234;1235;1675;3673;3674;4668;4669;4670;4798;4799;4800;4801;4802;5011;5995;7112;7930;8141;8142;8312;8444;8445;9799	1263;1264;1265;1736;3779;3780;4792;4793;4794;4922;4923;4924;4925;4926;5139;6151;7279;8119;8332;8333;8504;8648;8649;10045	1263;1264;1736;3779;4792;4926;5139;6151;7279;8119;8332;8504;8649;10045		147;148		42;519
P17987	P17987;F5H282;E7EQR6;E7ERF2	T-complex protein 1 subunit alpha	TCP1	sp|P17987|TCPA_HUMAN T-complex protein 1 subunit alpha OS=Homo sapiens OX=9606 GN=TCP1 PE=1 SV=1;tr|F5H282|F5H282_HUMAN T-complex protein 1 subunit alpha OS=Homo sapiens OX=9606 GN=TCP1 PE=1 SV=1;tr|E7EQR6|E7EQR6_HUMAN T-complex protein 1 subunit alpha OS=	10	11	11	11	0	9	0	9	0	9	21.6	21.6	21.6	60.343	556	0	70.072	0	16.7	0	0	0	0	0	0	0	11	15	530	83;743;814;1286;1312;1894;1976;2229;2491;2987;3012	True;True;True;True;True;True;True;True;True;True;True	83;757;829;1305;1331;1937;2021;2274;2541;3047;3073	197;198;199;2004;2164;2165;3429;3487;5140;5376;5377;6036;6765;8067;8139	204;205;206;2072;2235;2236;3528;3593;5269;5509;5510;6192;6926;8257;8330	204;2072;2236;3528;3593;5269;5510;6192;6926;8257;8330		294		1
B7Z9L0	B7Z9L0;B7Z2Z8;A8K3C3;P50991;B7Z2F4	T-complex protein 1 subunit delta	CCT4	tr|B7Z9L0|B7Z9L0_HUMAN T-complex protein 1 subunit delta OS=Homo sapiens OX=9606 PE=2 SV=1;tr|B7Z2Z8|B7Z2Z8_HUMAN T-complex protein 1 subunit delta OS=Homo sapiens OX=9606 PE=2 SV=1;tr|A8K3C3|A8K3C3_HUMAN T-complex protein 1 subunit delta OS=Homo sapiens O	5	8	8	8	0	8	0	8	0	8	19.7	19.7	19.7	52.33	483	0	53.615	0	19.7	0	0	0	0	0	0	0	9	12	266	181;369;418;961;1318;1362;3054;3385	True;True;True;True;True;True;True;True	183;377;427;976;1337;1381;3116;3452	463;977;978;1107;2566;3503;3622;8246;9196;9197;9198;9199	472;999;1000;1130;2640;3609;3728;8438;9420;9421;9422;9423	472;999;1130;2640;3609;3728;8438;9421
Q7Z759	Q7Z759;Q53HU0;P50990;H7C4C8	T-complex protein 1 subunit theta	CCT8	tr|Q7Z759|Q7Z759_HUMAN CCT-theta OS=Homo sapiens OX=9606 GN=CCT8 PE=2 SV=1;tr|Q53HU0|Q53HU0_HUMAN CCT-theta (Fragment) OS=Homo sapiens OX=9606 PE=2 SV=1;sp|P50990|TCPQ_HUMAN T-complex protein 1 subunit theta OS=Homo sapiens OX=9606 GN=CCT8 PE=1 SV=4;tr|H7C	5	8	8	8	0	8	0	8	0	8	17.5	17.5	17.5	54.106	497	0	53.386	0	17.5	0	22764000	0	711370	0	33917000	0	9	10	563	125;318;416;773;807;1800;1869;3261	True;True;True;True;True;True;True;True	126;325;425;787;822;1842;1912;3325	340;341;847;1102;2065;2148;4901;5073;8837	349;350;863;1125;2133;2219;5025;5026;5201;9050	350;863;1125;2133;2219;5026;5201;9050
Q59ET3	Q59ET3;B2R9K8;A0A024RDL1;P40227;A1JUI8;B4DPJ8;B4DN39	T-complex protein 1 subunit zeta	CCT6A	tr|Q59ET3|Q59ET3_HUMAN Chaperonin containing TCP1, subunit 6A isoform a variant (Fragment) OS=Homo sapiens OX=9606 PE=2 SV=1;tr|B2R9K8|B2R9K8_HUMAN cDNA, FLJ94440, highly similar to Homo sapiens chaperonin containing TCP1, subunit 6A (zeta 1)(CCT6A), mRNA	8	7	7	7	0	7	0	7	0	7	11.7	11.7	11.7	57.761	529	0	41.566	0	11.7	0	0	0	0	0	0	0	7	7	97	224;1055;1092;1104;1130;1279;1389	True;True;True;True;True;True;True	228;1071;1109;1121;1147;1298;1408	605;2799;2894;2922;2985;3415;3697	616;2877;2972;3000;3063;3514;3803	616;2877;2972;3000;3063;3514;3803
Q96GI1	Q96GI1;B4DE30;E7ENZ3;B4DYC8;B7ZAR1;B4DDU6;B4DZT5;B4DXI1;E9PCA1;Q9BU08;V9HW37;P48643;B4DX08	T-complex protein 1 subunit epsilon	CCT5;HEL-S-69	tr|Q96GI1|Q96GI1_HUMAN Uncharacterized protein (Fragment) OS=Homo sapiens OX=9606 PE=2 SV=1;tr|B4DE30|B4DE30_HUMAN CCT-epsilon OS=Homo sapiens OX=9606 PE=2 SV=1;tr|E7ENZ3|E7ENZ3_HUMAN T-complex protein 1 subunit epsilon OS=Homo sapiens OX=9606 GN=CCT5 PE=1	15	5	5	5	0	5	0	5	0	5	13.2	13.2	13.2	43.032	387	0	31.482	0	13.2	0	0	0	0	0	0	0	6	7	341	507;514;906;2577;2899	True;True;True;True;True	520;527;921;2627;2957	1382;1404;2411;2412;6978;7848;7849	1420;1442;2483;2484;7141;8037;8038	1420;1442;2483;7141;8037
H3BS86	H3BS86;Q9UNE7;H3BUD0	E3 ubiquitin-protein ligase CHIP	STUB1	tr|H3BS86|H3BS86_HUMAN E3 ubiquitin-protein ligase CHIP (Fragment) OS=Homo sapiens OX=9606 GN=STUB1 PE=1 SV=8;sp|Q9UNE7|CHIP_HUMAN E3 ubiquitin-protein ligase CHIP OS=Homo sapiens OX=9606 GN=STUB1 PE=1 SV=2;tr|H3BUD0|H3BUD0_HUMAN E3 ubiquitin-protein ligas	4	5	5	5	0	5	0	5	0	5	24.9	24.9	24.9	24.428	213	0	32.094	0	24.9	0	0	0	0	0	0	0	5	5	485	174;239;1870;2035;2326	True;True;True;True;True	176;244;1913;2080;2373	451;647;5074;5541;6308	460;658;5202;5675;6468	460;658;5202;5675;6468
B3KM36	B3KM36;B3KN59;O95816	BAG family molecular chaperone regulator 2	BAG2	tr|B3KM36|B3KM36_HUMAN cDNA FLJ10153 fis, clone HEMBA1003417, highly similar to BAG family molecular chaperone regulator 2 OS=Homo sapiens OX=9606 PE=2 SV=1;tr|B3KN59|B3KN59_HUMAN cDNA FLJ13673 fis, clone PLACE1011858, highly similar to BAG family molecula	3	4	4	4	0	4	0	4	0	4	18.5	18.5	18.5	23.712	211	0	30.712	0	18.5	0	0	0	0	0	0	0	4	6	324	542;869;1974;2395	True;True;True;True	555;884;2019;2443	1477;2302;2303;5371;5372;6528	1527;2374;2375;5504;5505;6689	1527;2374;5504;6689
F8VQ14	F8VQ14;F5GWF6;V9HW96;P78371;B7Z4R3	T-complex protein 1 subunit beta	CCT2;HEL-S-100n	tr|F8VQ14|F8VQ14_HUMAN CCT-beta OS=Homo sapiens OX=9606 GN=CCT2 PE=1 SV=1;tr|F5GWF6|F5GWF6_HUMAN CCT-beta OS=Homo sapiens OX=9606 GN=CCT2 PE=1 SV=2;tr|V9HW96|V9HW96_HUMAN CCT-beta OS=Homo sapiens OX=9606 GN=HEL-S-100n PE=2 SV=1;sp|P78371|TCPB_HUMAN T-compl	5	4	4	4	0	4	0	4	0	4	13.2	13.2	13.2	44.812	416	0	41.565	0	13.2	0	0	0	0	0	0	0	5	5	469	1427;1939;3282;3500	True;True;True;True	1449;1982;3347;3573	3826;5276;8896;8897;9573	3933;5406;9114;9115;9815	3933;5406;9115;9815
P49411	P49411;A0A384ME17	Elongation factor Tu, mitochondrial	TUFM	sp|P49411|EFTU_HUMAN Elongation factor Tu, mitochondrial OS=Homo sapiens OX=9606 GN=TUFM PE=1 SV=2;tr|A0A384ME17|A0A384ME17_HUMAN Elongation factor Tu OS=Homo sapiens OX=9606 GN=TUFM PE=2 SV=1	3	4	4	4	0	3	0	3	0	3	10.6	10.6	10.6	49.541	452	0	30.536	0	6.9	0	0	0	0	0	0	0	3	9	186	61;434;1182;1404	True;True;True;True	61;444;1200;1424	149;150;151;1159;3101;3102;3103;3104;3740	152;153;154;1189;3192;3193;3194;3195;3846	153;1189;3192;3846
Q2VPJ6	Q2VPJ6;Q8TBA7;K9JA46;P07900;Q86U12;Q96HX7;O75322	Heat shock protein HSP 90-alpha	HSP90AA1;EL52	tr|Q2VPJ6|Q2VPJ6_HUMAN HSP90AA1 protein (Fragment) OS=Homo sapiens OX=9606 GN=HSP90AA1 PE=2 SV=1;tr|Q8TBA7|Q8TBA7_HUMAN HSP90AA1 protein (Fragment) OS=Homo sapiens OX=9606 GN=HSP90AA1 PE=2 SV=2;tr|K9JA46|K9JA46_HUMAN Epididymis luminal secretory protein 52	7	5	2	2	0	3	0	1	0	1	9.9	3.4	3.4	68.371	585	0	11.322	0	6.2	0	0	0	0	0	0	0	1	3	504	46;627;1194;1881;2618	False;False;False;True;True	46;641;1212;1924;2668	108;109;1709;3132;3133;3134;3135;5109;5110;7099	110;111;1770;3227;3228;3229;3230;5238;5239;7266	110;1770;3228;5239;7266
B4DY72	B4DY72;B4DF68;A0A0A0MSM0;A0A024RDQ0;A0A024RDS1;Q92598	Heat shock protein 105 kDa	HSPH1	tr|B4DY72|B4DY72_HUMAN cDNA FLJ52360, highly similar to Heat-shock protein 105 kDa OS=Homo sapiens OX=9606 PE=2 SV=1;tr|B4DF68|B4DF68_HUMAN cDNA FLJ55325, highly similar to Heat-shock protein 105 kDa OS=Homo sapiens OX=9606 PE=2 SV=1;tr|A0A0A0MSM0|A0A0A0MS	15	3	3	2	0	3	0	3	0	2	5.2	5.2	3.1	77.162	677	0	20.213	0	5.2	0	0	0	0	0	0	0	3	3	98	857;895;947	True;True;True	872;910;962	2282;2375;2530	2354;2447;2602	2354;2447;2602
Q6IBT3	Q6IBT3;Q53HV2;Q99832;F8WAM2;B7Z7I4	T-complex protein 1 subunit eta	CCT7	tr|Q6IBT3|Q6IBT3_HUMAN T-complex protein 1 subunit eta OS=Homo sapiens OX=9606 GN=CCT7 PE=2 SV=1;tr|Q53HV2|Q53HV2_HUMAN T-complex protein 1 subunit eta (Fragment) OS=Homo sapiens OX=9606 PE=2 SV=1;sp|Q99832|TCPH_HUMAN T-complex protein 1 subunit eta OS=Hom	6	3	3	3	0	3	0	3	0	3	5.2	5.2	5.2	59.328	543	0	17.627	0	5.2	0	21762000	0	702010	0	32424000	0	3	3	615	71;1962;3065	True;True;True	71;2007;3127	170;5336;8282	175;5467;8474	175;5467;8474
B4DMA2	B4DMA2;P08238;B4DGL0;A0A024RD80;A8K3W9;Q6PK50;Q9H6X9	Heat shock protein HSP 90-beta	HSP90AB1	tr|B4DMA2|B4DMA2_HUMAN cDNA FLJ54023, highly similar to Heat shock protein HSP 90-beta OS=Homo sapiens OX=9606 PE=2 SV=1;sp|P08238|HS90B_HUMAN Heat shock protein HSP 90-beta OS=Homo sapiens OX=9606 GN=HSP90AB1 PE=1 SV=4;tr|B4DGL0|B4DGL0_HUMAN cDNA FLJ53619	33	6	6	3	0	2	0	2	0	0	11.2	11.2	5.7	79.194	686	0	57.494	0	3.8	0	0	0	0	0	0	0	2	11	92	46;627;701;1194;1242;1320	True;True;True;True;True;True	46;641;715;1212;1261;1339	108;109;1709;1893;3132;3133;3134;3135;3277;3278;3508	110;111;1770;1961;3227;3228;3229;3230;3373;3374;3614	110;1770;1961;3228;3373;3614
B4DLP4	B4DLP4;A0A024R2Q4;P61313;E7EX53;A0A2R8Y738;A0A2R8YEM3;E7EQV9	Ribosomal protein L15;60S ribosomal protein L15	RPL15	tr|B4DLP4|B4DLP4_HUMAN Ribosomal protein L15 OS=Homo sapiens OX=9606 PE=2 SV=1;tr|A0A024R2Q4|A0A024R2Q4_HUMAN Ribosomal protein L15 OS=Homo sapiens OX=9606 GN=RPL15 PE=3 SV=1;sp|P61313|RL15_HUMAN 60S ribosomal protein L15 OS=Homo sapiens OX=9606 GN=RPL15 P	11	3	3	3	0	2	0	2	0	2	20.7	20.7	20.7	19.338	164	0	19.63	0	15.2	0	0	0	0	0	0	0	2	9	35	854;944;2910	True;True;True	869;959;2969	2277;2278;2279;2526;7879;7880;7881;7882;7883	2349;2350;2351;2598;8068;8069;8070;8071;8072	2351;2598;8068
A0A7I2YQI0	A0A7I2YQI0;C9J494;A0A7I2V5D2;Q9H000;A0A7I2V422	Probable E3 ubiquitin-protein ligase makorin-2	MKRN2	tr|A0A7I2YQI0|A0A7I2YQI0_HUMAN Probable E3 ubiquitin-protein ligase makorin-2 OS=Homo sapiens OX=9606 GN=MKRN2 PE=1 SV=1;tr|C9J494|C9J494_HUMAN Probable E3 ubiquitin-protein ligase makorin-2 OS=Homo sapiens OX=9606 GN=MKRN2 PE=1 SV=1;tr|A0A7I2V5D2|A0A7I2V5	5	4	4	4	0	2	0	2	0	2	9.8	9.8	9.8	46.334	410	0	24.698	0	5.4	0	0	0	0	0	0	0	2	10	235	80;1692;1777;2095	True;True;True;True	80;1728;1819;2140	193;4577;4578;4579;4843;5687;5688;5689;5690;5691	200;4700;4701;4702;4967;5835;5836;5837;5838;5839	200;4701;4967;5837
P05109	P05109	Protein S100-A8;Protein S100-A8, N-terminally processed	S100A8	sp|P05109|S10A8_HUMAN Protein S100-A8 OS=Homo sapiens OX=9606 GN=S100A8 PE=1 SV=1	1	3	3	3	0	2	0	2	0	2	21.5	21.5	21.5	10.834	93	0	22.181	0	20.4	0	0	0	0	0	0	0	2	5	515	1652;1975;2853	True;True;True	1686;2020;2908	4482;5373;5374;5375;7720	4604;5506;5507;5508;7909	4604;5508;7909
Q9NX20	Q9NX20;E9PI14	39S ribosomal protein L16, mitochondrial	MRPL16	sp|Q9NX20|RM16_HUMAN 39S ribosomal protein L16, mitochondrial OS=Homo sapiens OX=9606 GN=MRPL16 PE=1 SV=1;tr|E9PI14|E9PI14_HUMAN 39S ribosomal protein L16, mitochondrial (Fragment) OS=Homo sapiens OX=9606 GN=MRPL16 PE=1 SV=1	2	2	2	2	0	2	0	2	0	2	8	8	8	28.449	251	0	11.877	0	8	0	0	0	0	0	0	0	2	6	676	1310;3485	True;True	1329;3557	3484;3485;9521;9522;9523;9524	3590;3591;9763;9764;9765;9766	3591;9766		360		223
P62987	P62987;L8B196;F5H747;F5GXK7;J3QKN0;Q5U5U6;Q5PY61;Q9UFQ0;Q96C32;Q96MH4;A0A2R8Y422;A0A248RGE3;Q96H31;L8B4R0;A8K674;L8B4M0;L8B4Z6;L8B4J3;Q66K58;B2RDW1;L8B4I8;Q59EM9;J3QS39;Q3MIH3;P0CG47;P0CG48;P62979;F5H6Q2;F5H388;Q5UGI3;B4DV12;M0R1M6;J3QTR3;F5H265;M0R2S1;F5H2Z3;F5GYU3;Q5RKT7;M0R1V7;Q49A90;Q8WYN9;F5GZ39	Ubiquitin-60S ribosomal protein L40;Ubiquitin;60S ribosomal protein L40;Polyubiquitin-B;Ubiquitin;Polyubiquitin-C;Ubiquitin;Ubiquitin-40S ribosomal protein S27a;Ubiquitin;40S ribosomal protein S27a	UBA52;UbC;UBC;UBB;DKFZp434K0435;HEL112;RPS27A	sp|P62987|RL40_HUMAN Ubiquitin-60S ribosomal protein L40 OS=Homo sapiens OX=9606 GN=UBA52 PE=1 SV=2;tr|L8B196|L8B196_HUMAN Ubiquitin C OS=Homo sapiens OX=9606 GN=UbC PE=4 SV=1;tr|F5H747|F5H747_HUMAN Polyubiquitin-C (Fragment) OS=Homo sapiens OX=9606 GN=UBC	43	4	4	4	0	2	0	2	0	2	33.6	33.6	33.6	14.728	128	0	24.995	0	16.4	0	0	0	0	0	0	0	2	6	175	770;1458;1914;3173	True;True;True;True	784;1482;1957;3236	2062;3905;5204;5205;5206;8564	2130;4012;5334;5335;5336;8774	2130;4012;5334;8774	36		48
O95429	O95429;H0YBT1;B2RA34	BAG family molecular chaperone regulator 4	BAG4	sp|O95429|BAG4_HUMAN BAG family molecular chaperone regulator 4 OS=Homo sapiens OX=9606 GN=BAG4 PE=1 SV=1;tr|H0YBT1|H0YBT1_HUMAN BAG family molecular chaperone regulator 4 (Fragment) OS=Homo sapiens OX=9606 GN=BAG4 PE=1 SV=1;tr|B2RA34|B2RA34_HUMAN cDNA, FL	3	2	2	2	0	2	0	2	0	2	6.1	6.1	6.1	49.593	457	0	102.87	0	6.1	0	0	0	0	0	0	0	2	3	514	705;2982	True;True	719;3042	1902;1903;8058	1970;1971;8248	1970;8248
A0A494C0J7	A0A494C0J7;Q08188;B4DQ50	Protein-glutamine gamma-glutamyltransferase E;Protein-glutamine gamma-glutamyltransferase E 50 kDa catalytic chain;Protein-glutamine gamma-glutamyltransferase E 27 kDa non-catalytic chain	TGM3	tr|A0A494C0J7|A0A494C0J7_HUMAN TGc domain-containing protein OS=Homo sapiens OX=9606 PE=3 SV=1;sp|Q08188|TGM3_HUMAN Protein-glutamine gamma-glutamyltransferase E OS=Homo sapiens OX=9606 GN=TGM3 PE=1 SV=4;tr|B4DQ50|B4DQ50_HUMAN cDNA FLJ56823, highly similar	4	7	7	7	0	1	0	1	0	1	10.8	10.8	10.8	78.856	712	0	44.514	0	1.8	0	0	0	0	0	0	0	1	11	208	357;1323;2428;2492;3401;3486;3518	True;True;True;True;True;True;True	365;1342;2477;2542;3469;3558;3591	948;3519;6614;6615;6766;9238;9239;9240;9241;9525;9616	969;3625;6775;6776;6927;9462;9463;9464;9465;9767;9860	969;3625;6775;6927;9462;9767;9860
A0A384N6H1	A0A384N6H1;P13639;Q8TA90;B4DPU3;B4DRE8;Q6PK56	Elongation factor 2	EEF2	tr|A0A384N6H1|A0A384N6H1_HUMAN Epididymis secretory sperm binding protein OS=Homo sapiens OX=9606 PE=2 SV=1;sp|P13639|EF2_HUMAN Elongation factor 2 OS=Homo sapiens OX=9606 GN=EEF2 PE=1 SV=4;tr|Q8TA90|Q8TA90_HUMAN Similar to Elongation factor 2b (Fragment)	8	4	4	3	0	1	0	1	0	1	4.5	4.5	3.4	95.337	858	0	25.631	0	1	0	0	0	0	0	0	0	1	12	197	1019;2482;3346;3476	True;True;True;True	1034;2532;3413;3548	2709;2710;2711;6755;9074;9075;9076;9077;9490;9491;9492;9493	2783;2784;2785;6916;9297;9298;9299;9300;9732;9733;9734;9735	2785;6916;9297;9733
B4DUP0	B4DUP0;Q53YD7;P26641	Elongation factor 1-gamma	EEF1G	tr|B4DUP0|B4DUP0_HUMAN cDNA FLJ59433, highly similar to Elongation factor 1-gamma OS=Homo sapiens OX=9606 PE=2 SV=1;tr|Q53YD7|Q53YD7_HUMAN Elongation factor 1-gamma OS=Homo sapiens OX=9606 GN=EEF1G PE=2 SV=1;sp|P26641|EF1G_HUMAN Elongation factor 1-gamma O	3	3	3	3	0	1	0	1	0	1	16.5	16.5	16.5	24.104	206	0	17.364	0	6.8	0	0	0	0	0	0	0	1	3	356	145;1640;3009	True;True;True	146;1674;3070	386;4453;8132	395;4575;8323	395;4575;8323
E7ESK7	E7ESK7;D0PNI1;E7EX29;P63104;E5RGE1;E5RIR4;E9PD24;E7EVZ2	14-3-3 protein zeta/delta	YWHAZ	tr|E7ESK7|E7ESK7_HUMAN 14-3-3 protein zeta/delta (Fragment) OS=Homo sapiens OX=9606 GN=YWHAZ PE=1 SV=1;tr|D0PNI1|D0PNI1_HUMAN Epididymis luminal protein 4 OS=Homo sapiens OX=9606 GN=YWHAZ PE=2 SV=1;tr|E7EX29|E7EX29_HUMAN 14-3-3 protein zeta/delta (Fragment	10	3	2	2	0	1	0	1	0	1	24.1	19	19	15.697	137	0	21.152	0	10.2	0	0	0	0	0	0	0	1	5	445	879;1778;3034	True;False;True	894;1820;3096	2330;4844;4845;8204;8205;8206;8207	2402;4968;4969;8395;8396;8397;8398	2402;4969;8395
A0A140VK00	A0A140VK00;P25311	Zinc-alpha-2-glycoprotein	AZGP1	tr|A0A140VK00|A0A140VK00_HUMAN Testicular tissue protein Li 227 OS=Homo sapiens OX=9606 PE=2 SV=1;sp|P25311|ZA2G_HUMAN Zinc-alpha-2-glycoprotein OS=Homo sapiens OX=9606 GN=AZGP1 PE=1 SV=2	2	1	1	1	0	1	0	1	0	1	3.4	3.4	3.4	34.258	298	0	10.183	0	3.4	0	0	0	0	0	0	0	1	4	159	100	TRUE	100	251;252;253;254	258;259;260;261	260
A0A5C2GAB1	A0A5C2GAB1;A0A5C2G4T0			tr|A0A5C2GAB1|A0A5C2GAB1_HUMAN IGH + IGL c25_light_IGLV3-1_IGLJ2 (Fragment) OS=Homo sapiens OX=9606 PE=2 SV=1;tr|A0A5C2G4T0|A0A5C2G4T0_HUMAN IGL c2925_light_IGLV3-1_IGLJ3 (Fragment) OS=Homo sapiens OX=9606 PE=2 SV=1	2	1	1	1	0	1	0	1	0	1	9.4	9.4	9.4	11.623	106	0	17.141	0	9.4	0	0	0	0	0	0	0	1	5	220	2837	TRUE	2890	7657;7658;7659;7660;7661	7845;7846;7847;7848;7849	7849
A4FU77	A4FU77;O75643;A0A494C1A5	U5 small nuclear ribonucleoprotein 200 kDa helicase	SNRNP200	tr|A4FU77|A4FU77_HUMAN SNRNP200 protein (Fragment) OS=Homo sapiens OX=9606 GN=SNRNP200 PE=2 SV=1;sp|O75643|U520_HUMAN U5 small nuclear ribonucleoprotein 200 kDa helicase OS=Homo sapiens OX=9606 GN=SNRNP200 PE=1 SV=2;tr|A0A494C1A5|A0A494C1A5_HUMAN U5 small	10	9	9	9	0	1	0	1	0	1	5.4	5.4	5.4	216.18	1887	0	54.766	0	0.8	0	0	0	0	0	0	0	1	16	257	633;1512;1531;2140;2328;3110;3192;3347;3569	True;True;True;True;True;True;True;True;True	647;1536;1556;2185;2375;3172;3256;3414;3643	1729;4066;4067;4115;5826;5827;5828;6312;8391;8392;8629;8630;8631;9078;9079;9764	1796;4183;4184;4233;5978;5979;5980;6472;8594;8595;8841;8842;8843;9301;9302;10009	1796;4184;4233;5980;6472;8594;8842;9302;10009		166		392
B2R4C5	B2R4C5;P61626;F8VV32;A0A0B4J259	Lysozyme;Lysozyme C	LYZ	tr|B2R4C5|B2R4C5_HUMAN 1,4-beta-N-acetylmuramidase C OS=Homo sapiens OX=9606 GN=LYZ PE=2 SV=1;sp|P61626|LYSC_HUMAN Lysozyme C OS=Homo sapiens OX=9606 GN=LYZ PE=1 SV=1;tr|F8VV32|F8VV32_HUMAN 1,4-beta-N-acetylmuramidase C OS=Homo sapiens OX=9606 GN=LYZ PE=1	4	3	3	3	0	1	0	1	0	1	20.3	20.3	20.3	16.537	148	0	19.156	0	6.1	0	0	0	0	0	0	0	1	7	305	307;3005;3571	True;True;True	314;3066;3645	822;823;824;825;8118;9770;9771	838;839;840;841;8309;10015;10016	840;8309;10015
B2R4R9	B2R4R9;P62857	40S ribosomal protein S28	RPS28	tr|B2R4R9|B2R4R9_HUMAN 40S ribosomal protein S28 OS=Homo sapiens OX=9606 GN=RPS28 PE=2 SV=1;sp|P62857|RS28_HUMAN 40S ribosomal protein S28 OS=Homo sapiens OX=9606 GN=RPS28 PE=1 SV=1	2	1	1	1	0	1	0	1	0	1	17.4	17.4	17.4	7.8409	69	0	6.6304	0	17.4	0	0	0	0	0	0	0	1	3	309	623	TRUE	637	1700;1701;1702	1761;1762;1763	1761
B7Z597	B7Z597;A0A7I2YQK6;B7Z5E7;A0A7I2V599;A0A7I2V2X6;B7Z4F6;B3GQS7;A0A024R3X4;P10809	60 kDa heat shock protein, mitochondrial	HSPD1	tr|B7Z597|B7Z597_HUMAN 60 kDa chaperonin OS=Homo sapiens OX=9606 PE=2 SV=1;tr|A0A7I2YQK6|A0A7I2YQK6_HUMAN 60 kDa chaperonin OS=Homo sapiens OX=9606 GN=HSPD1 PE=1 SV=1;tr|B7Z5E7|B7Z5E7_HUMAN 60 kDa chaperonin OS=Homo sapiens OX=9606 PE=2 SV=1;tr|A0A7I2V599|	15	3	3	3	0	1	0	1	0	1	8	8	8	60.047	564	0	17.14	0	2.1	0	0	0	0	0	0	0	1	5	380	1492;3353;3355	True;True;True	1516;3420;3422	4004;9096;9098;9099;9100	4121;9319;9321;9322;9323	4121;9319;9322	85;86		343;350
Q5K634	Q5K634;P29508	Serpin B3	SERPINB3	tr|Q5K634|Q5K634_HUMAN SCCA2/SCCA1 fusion protein isoform 1 OS=Homo sapiens OX=9606 PE=2 SV=1;sp|P29508|SPB3_HUMAN Serpin B3 OS=Homo sapiens OX=9606 GN=SERPINB3 PE=1 SV=2	9	3	3	3	0	1	0	1	0	1	8.7	8.7	8.7	44.648	390	0	18.297	0	2.6	0	0	0	0	0	0	0	1	5	540	865;1105;2839	True;True;True	880;1122;2892	2296;2923;2924;2925;7663	2368;3001;3002;3003;7851	2368;3001;7851
Q68DB0	Q68DB0		DKFZp781H1314	tr|Q68DB0|Q68DB0_HUMAN Uncharacterized protein DKFZp781H1314 (Fragment) OS=Homo sapiens OX=9606 GN=DKFZp781H1314 PE=2 SV=1	1	1	1	1	0	1	0	1	0	1	7.9	7.9	7.9	12.418	114	0.0079872	6.0935	0	7.9	0	0	0	0	0	0	0	2	6	627	1984	TRUE	2029	5402;5403;5404;5405;5406;5407	5535;5536;5537;5538;5539;5540	5539	130;131;132		5;7;9
Q6ZMM9	Q6ZMM9;Q2NKW8;H0Y8B3;Q6ZNS6;A0A024R0A8;V5YQL4;O43865;Q96HN2	Adenosylhomocysteinase;Putative adenosylhomocysteinase 2;Putative adenosylhomocysteinase 3	AHCYL1;AHCYL2;FGFR2-AHCYL1	tr|Q6ZMM9|Q6ZMM9_HUMAN cDNA FLJ16815 fis, clone THYMU3044175, highly similar to Adenosylhomocysteinase OS=Homo sapiens OX=9606 PE=2 SV=1;tr|Q2NKW8|Q2NKW8_HUMAN Adenosylhomocysteinase (Fragment) OS=Homo sapiens OX=9606 GN=AHCYL1 PE=2 SV=1;tr|H0Y8B3|H0Y8B3_H	8	1	1	1	0	1	0	1	0	1	3.8	3.8	3.8	35.359	317	0	6.7786	0	3.8	0	0	0	0	0	0	0	1	1	12	1063	TRUE	1079	2819	2897	2897
A0A024R6M6	A0A024R6M6;A8K5J7;Q9UL15	BAG family molecular chaperone regulator 5	BAG5	tr|A0A024R6M6|A0A024R6M6_HUMAN BCL2-associated athanogene 5 OS=Homo sapiens OX=9606 GN=BAG5 PE=2 SV=1;tr|A8K5J7|A8K5J7_HUMAN cDNA FLJ77290, highly similar to Homo sapiens BCL2-associated athanogene 5 (BAG5), mRNA OS=Homo sapiens OX=9606 PE=2 SV=1;sp|Q9UL15	3	1	1	1	0	1	0	1	0	1	2.7	2.7	2.7	51.199	447	0.0064205	6.1129	0	2.7	0	0	0	0	0	0	0	1	1	53	3617	TRUE	3691	9880	10138	10138
A0A087WTG3	A0A087WTG3		CUL3	tr|A0A087WTG3|A0A087WTG3_HUMAN Cullin-3 OS=Homo sapiens OX=9606 GN=CUL3 PE=1 SV=1	1	1	1	1	0	1	0	1	0	1	3.5	3.5	3.5	39.147	342	1	-2	0	3.5	0	0	0	0	0	0	0	1	1	101	3343	TRUE	3410	9065	9288	9288	27;28	77;78	26;31	23;28
B4DEJ8	B4DEJ8;A2A2L6;A2A2L5;B2RB99;B4DXL5;A0A0A0MQR2;Q9BY42	Protein RTF2 homolog	RTFDC1	tr|B4DEJ8|B4DEJ8_HUMAN cDNA FLJ52477 OS=Homo sapiens OX=9606 PE=2 SV=1;tr|A2A2L6|A2A2L6_HUMAN Replication termination factor 2 OS=Homo sapiens OX=9606 GN=RTF2 PE=1 SV=1;tr|A2A2L5|A2A2L5_HUMAN Replication termination factor 2 (Fragment) OS=Homo sapiens OX=9	7	1	1	1	0	1	0	1	0	1	8.2	8.2	8.2	13.23	122	1	-2	0	8.2	0	10253000	0	1708900	0	15276000	0	1	1	118	179	TRUE	181	457	466	466	29		83
Q0EFA5	Q0EFA5;A8K9C1;A0A1U9X8Y9;A0A1U9X8X8;A0A1U9X8X5;Q2L6G8;M1SWB8;G8JLG2;D2IYL2;A0A1U9X901;A0A1U9X8Z0;A0A1U9X8X6;Q15517	Corneodesmosin	S;CDSN	tr|Q0EFA5|Q0EFA5_HUMAN Corneodesmosin OS=Homo sapiens OX=9606 GN=S PE=4 SV=1;tr|A8K9C1|A8K9C1_HUMAN Corneodesmosin OS=Homo sapiens OX=9606 PE=1 SV=1;tr|A0A1U9X8Y9|A0A1U9X8Y9_HUMAN Corneodesmosin OS=Homo sapiens OX=9606 PE=4 SV=1;tr|A0A1U9X8X8|A0A1U9X8X8_HU	13	1	1	1	0	1	0	1	0	1	3.5	3.5	3.5	49.896	512	0	12.833	0	3.5	0	0	0	0	0	0	0	1	3	169	1168	TRUE	1186	3076;3077;3078	3167;3168;3169	3168
H0YDZ4	H0YDZ4;A0A2X0SFH1;Q8TCU6	Phosphatidylinositol 3,4,5-trisphosphate-dependent Rac exchanger 1 protein	PREX1	tr|H0YDZ4|H0YDZ4_HUMAN Phosphatidylinositol 3,4,5-trisphosphate-dependent Rac exchanger 1 protein (Fragment) OS=Homo sapiens OX=9606 GN=PREX1 PE=1 SV=1;tr|A0A2X0SFH1|A0A2X0SFH1_HUMAN PREX1 (Fragment) OS=Homo sapiens OX=9606 GN=PREX1 PE=4 SV=1;sp|Q8TCU6|PRE	3	1	1	1	0	1	0	1	0	1	1.9	1.9	1.9	98.479	883	1	-2	0	1.9	0	0	0	0	0	0	0	1	1	185	1160	TRUE	1178	3056	3142	3142		136		63
E7ETR0	E7ETR0;B3KRS7;B5BUB1;A0A384MTR5;Q9Y265	RuvB-like 1	RUVBL1	tr|E7ETR0|E7ETR0_HUMAN RuvB-like helicase OS=Homo sapiens OX=9606 GN=RUVBL1 PE=1 SV=1;tr|B3KRS7|B3KRS7_HUMAN RuvB-like helicase OS=Homo sapiens OX=9606 PE=2 SV=1;tr|B5BUB1|B5BUB1_HUMAN RuvB-like helicase (Fragment) OS=Homo sapiens OX=9606 GN=RUVBL1 PE=2 SV	5	1	1	1	0	1	0	1	0	1	3.8	3.8	3.8	34.782	315	0.0017065	6.3459	0	3.8	0	0	0	0	0	0	0	1	1	191	329	TRUE	336	872	888	888
A0A494C0M8	A0A494C0M8;A0A494C171			tr|A0A494C0M8|A0A494C0M8_HUMAN Protein TALPID3 OS=Homo sapiens OX=9606 GN=KIAA0586 PE=1 SV=1;tr|A0A494C171|A0A494C171_HUMAN Protein TALPID3 OS=Homo sapiens OX=9606 GN=KIAA0586 PE=1 SV=1	2	1	1	1	0	1	0	1	0	1	0.7	0.7	0.7	167.9	1521	1	-2	0	0.7	0	0	0	0	0	0	0	1	1	209	2249	TRUE	2294	6098	6254	6254	43;44	150	2;11	1
A0A5C2H1Z5	A0A5C2H1Z5			tr|A0A5C2H1Z5|A0A5C2H1Z5_HUMAN IG c966_light_IGLV2-11_IGLJ1 (Fragment) OS=Homo sapiens OX=9606 PE=2 SV=1	1	1	1	1	0	1	0	1	0	1	11	11	11	11.46	109	0	6.9797	0	11	0	0	0	0	0	0	0	1	2	224	2986	TRUE	3046	8065;8066	8255;8256	8256
V9HW07	V9HW07;A8K5C8;P17031	Zinc finger protein 26	HEL-179;ZNF26	tr|V9HW07|V9HW07_HUMAN Epididymis luminal protein 179 OS=Homo sapiens OX=9606 GN=HEL-179 PE=2 SV=1;tr|A8K5C8|A8K5C8_HUMAN cDNA FLJ77537, highly similar to Homo sapiens zinc finger protein 26 (KOX 20) (ZNF26), mRNA OS=Homo sapiens OX=9606 PE=2 SV=1;sp|P1703	3	1	1	1	0	1	0	1	0	1	1.9	1.9	1.9	61.282	533	0.0064725	6.1608	0	1.9	0	37037000	0	1277100	0	55183000	0	1	2	277	2912	TRUE	2971	7885;7886	8074;8075	8074
B4DHY7	B4DHY7;B4E1C9;Q53GS5;B2RBI2;Q96A49	Synapse-associated protein 1	SYAP1	tr|B4DHY7|B4DHY7_HUMAN cDNA FLJ60548, highly similar to Synapse-associated protein 1 OS=Homo sapiens OX=9606 PE=2 SV=1;tr|B4E1C9|B4E1C9_HUMAN cDNA FLJ52963, highly similar to Synapse-associated protein 1 OS=Homo sapiens OX=9606 PE=2 SV=1;tr|Q53GS5|Q53GS5_H	5	1	1	1	0	1	0	1	0	1	5.4	5.4	5.4	21.614	186	1	-2	0	5.4	0	0	0	0	0	0	0	1	1	315	1577	TRUE	1605	4269	4389	4389	67	201	126	128
B3KX20	B3KX20;B4E3F8;B4E3S9;B4DIX9;P29536	Leiomodin-1	LMOD1	tr|B3KX20|B3KX20_HUMAN cDNA FLJ44510 fis, clone UTERU3001652, highly similar to Leiomodin-1 OS=Homo sapiens OX=9606 PE=2 SV=1;tr|B4E3F8|B4E3F8_HUMAN cDNA FLJ54257, highly similar to Leiomodin-1 OS=Homo sapiens OX=9606 PE=2 SV=1;tr|B4E3S9|B4E3S9_HUMAN cDNA	5	1	1	1	0	1	0	1	0	1	1.6	1.6	1.6	55.05	491	1	-2	0	1.6	0	0	0	0	0	0	0	1	1	336	1556	TRUE	1583	4207	4325	4325	72		384
B4DM55	B4DM55			tr|B4DM55|B4DM55_HUMAN Non-specific serine/threonine protein kinase OS=Homo sapiens OX=9606 PE=2 SV=1	1	1	1	1	0	1	0	1	0	1	1.8	1.8	1.8	59.826	541	1	-2	0	1.8	0	0	0	0	0	0	0	1	4	352	1700	TRUE	1736	4606;4607;4608;4609	4729;4730;4731;4732	4731	78	212	2	10
B6DU70	B6DU70		ESR1	tr|B6DU70|B6DU70_HUMAN Estrogen receptor alpha delta 4,5,6,7 isoform (Fragment) OS=Homo sapiens OX=9606 GN=ESR1 PE=2 SV=1	1	1	1	1	0	1	0	1	0	1	17.9	17.9	17.9	7.7199	67	1	-2	0	17.9	0	0	0	0	0	0	0	1	2	377	354	TRUE	361	928;929	945;946	946		219;220		58;59
H0YJE3	H0YJE3;G9BAV9;Q6ZU80	Centrosomal protein of 128 kDa	CEP128;LEDP/132	tr|H0YJE3|H0YJE3_HUMAN Centrosomal protein of 128 kDa (Fragment) OS=Homo sapiens OX=9606 GN=CEP128 PE=1 SV=1;tr|G9BAV9|G9BAV9_HUMAN Lens epithelium-derived protein OS=Homo sapiens OX=9606 GN=LEDP/132 PE=2 SV=1;sp|Q6ZU80|CE128_HUMAN Centrosomal protein of 1	3	1	1	1	0	1	0	1	0	1	2.1	2.1	2.1	80.198	679	0	6.6721	0	2.1	0	0	0	0	0	0	0	1	4	477	3163	TRUE	3225	8522;8523;8524;8525	8727;8728;8729;8730	8727	108;109	265	436;440	438
H9ZYJ2	H9ZYJ2;P10599	Thioredoxin	TXN	tr|H9ZYJ2|H9ZYJ2_HUMAN Thioredoxin OS=Homo sapiens OX=9606 GN=TXN PE=2 SV=1;sp|P10599|THIO_HUMAN Thioredoxin OS=Homo sapiens OX=9606 GN=TXN PE=1 SV=3	2	3	3	3	0	1	0	1	0	1	30.5	30.5	30.5	11.737	105	0	17.321	0	8.6	0	0	0	0	0	0	0	1	4	492	663;2246;3351	True;True;True	677;2291;3418	1818;6092;6093;9094	1886;6248;6249;9317	1886;6248;9317		272		37
J3QRS3	J3QRS3;P19105;O14950;J3KTJ1;Q2F834;Q53HL1;Q71U02;Q6IBG1;A0A384NY64;P24844	Myosin regulatory light chain 12A;Myosin regulatory light chain 12B;Myosin regulatory light polypeptide 9	MYL12A;MYL12B;MYL9	tr|J3QRS3|J3QRS3_HUMAN Myosin regulatory light chain 12A OS=Homo sapiens OX=9606 GN=MYL12A PE=1 SV=1;sp|P19105|ML12A_HUMAN Myosin regulatory light chain 12A OS=Homo sapiens OX=9606 GN=MYL12A PE=1 SV=2;sp|O14950|ML12B_HUMAN Myosin regulatory light chain 12B	10	5	5	5	0	1	0	1	0	1	37.9	37.9	37.9	20.457	177	0	75.14	0	5.6	0	0	0	0	0	0	0	1	6	496	310;400;549;1111;2037	True;True;True;True;True	317;409;562;1128;2082	830;1062;1492;2935;2936;5544	846;1085;1549;3013;3014;5678	846;1085;1549;3014;5678		273;274;275		30;45;62
P25398	P25398	40S ribosomal protein S12	RPS12	sp|P25398|RS12_HUMAN 40S ribosomal protein S12 OS=Homo sapiens OX=9606 GN=RPS12 PE=1 SV=3	1	2	2	2	0	1	0	1	0	1	18.9	18.9	18.9	14.515	132	0	12.512	0	7.6	0	0	0	0	0	0	0	1	6	535	2173;3057	True;True	2218;3119	5928;8257;8258;8259;8260;8261	6080;8449;8450;8451;8452;8453	6080;8451
Q5T280	Q5T280;R4GNG4;B4E0X4;Q9P041	Putative methyltransferase C9orf114	C9orf114	sp|Q5T280|CI114_HUMAN Putative methyltransferase C9orf114 OS=Homo sapiens OX=9606 GN=SPOUT1 PE=1 SV=3;tr|R4GNG4|R4GNG4_HUMAN Putative methyltransferase C9orf114 (Fragment) OS=Homo sapiens OX=9606 GN=SPOUT1 PE=1 SV=1;tr|B4E0X4|B4E0X4_HUMAN cDNA FLJ51433 OS=	4	2	2	2	0	1	0	1	0	1	7.2	7.2	7.2	42.008	376	0	12.146	0	3.7	0	0	0	0	0	0	0	1	3	621	1159;2664	True;True	1177;2714	3054;3055;7192	3140;3141;7362	3140;7362
Q6UWP8	Q6UWP8;K7ESC4	Suprabasin	SBSN	sp|Q6UWP8|SBSN_HUMAN Suprabasin OS=Homo sapiens OX=9606 GN=SBSN PE=1 SV=2;tr|K7ESC4|K7ESC4_HUMAN Suprabasin (Fragment) OS=Homo sapiens OX=9606 GN=SBSN PE=1 SV=2	2	5	5	5	0	1	0	1	0	1	15.9	15.9	15.9	60.54	590	0	43.657	0	3.1	0	0	0	0	0	0	0	1	8	633	162;548;849;1097;3388	True;True;True;True;True	163;561;864;1114;3455	419;420;1491;2257;2258;2259;2902;9204	428;429;1548;2329;2330;2331;2980;9428	429;1548;2331;2980;9428
Q9Y2H9	Q9Y2H9	Microtubule-associated serine/threonine-protein kinase 1	MAST1	sp|Q9Y2H9|MAST1_HUMAN Microtubule-associated serine/threonine-protein kinase 1 OS=Homo sapiens OX=9606 GN=MAST1 PE=1 SV=2	1	1	1	1	0	1	0	1	0	1	0.6	0.6	0.6	170.68	1570	0	6.4561	0	0.6	0	0	0	0	0	0	0	1	1	685	1871	TRUE	1914	5075	5203	5203
U3KX66	U3KX66	ATP synthase protein 8	ATP8	tr|U3KX66|U3KX66_HUMAN ATP synthase protein 8 OS=Homo sapiens OX=9606 GN=ATP8 PE=3 SV=1	1	1	1	1	0	1	0	1	0	1	13.2	13.2	13.2	7.9926	68	1	-2	0	13.2	0	0	0	0	0	0	0	1	3	700	2473	TRUE	2522	6727;6728;6729	6888;6889;6890	6888		375;376		42;44

## Sheet: peptide
Sequence	Length	Missed cleavages	Mass	Proteins	Leading razor protein	Start position	End position	Gene names	Protein names	Unique (Groups)	Unique (Proteins)	Charges	PEP	Score	Experiment NC	Experiment WDR37	Intensity NC	Intensity WDR37	id	Protein group IDs	Mod. peptide IDs	Evidence IDs	MS/MS IDs	Best MS/MS	GlyGly (K) site IDs	Oxidation (M) site IDs	MS/MS Count	LFQ intensity NC	LFQ intensity WDR37
LAAEGQAIDGAELSK	15	0	1471.75	A0A3B3IT47;Q9Y2I8;E7EQ49;A0A087WTQ2;C9JGR9	A0A3B3IT47	90	104	WDR37	WD repeat-containing protein 37	yes	no	2;3	6.1308e-29	196.27		5	0	0	1765	203	1806	4798;4799;4800;4801;4802	4922;4923;4924;4925;4926	4926			5	0	0
KSHSLSIR	8	1	926.53	A0A3B3IT47;Q9Y2I8;E7EQ49;A0A087WTQ2	A0A3B3IT47	19	26	WDR37	WD repeat-containing protein 37	yes	no	2	0.0045306	143.73		3	0	0	1718	203	1756	4668;4669;4670	4792;4793;4794	4792			3	0	0
AFHNEAQVNPERK	13	1	1538.76	P17987;F5H282;E7EQR6	P17987	469	481	TCP1	T-complex protein 1 subunit alpha	yes	no	2;3	0.0007397	111.31		2	0	0	83	530	83	197;198;199	204;205;206	204			3	0	0
AGFAGDDAPR	10	0	975.441	P63261;I3L4N8;B4DVQ0;B4E335;P60709;Q8WVW5;Q53G76;Q53G99;Q53GK6;Q1KLZ0;B4E3A4;B4DW52;E7EVS6;P63267;P68133;P68032;B7Z6P1;B3KUD3;P62736;D2JYH4;A0A2R8Y793;A6NL76;I3L1U9;A8K3K1;I3L3I0;Q7Z7J6;B3KW67;A0A6Q8PH58;A1E282;I3L3R2;G5E9R0;K7EM38;Q13707;J3KT65;A0A2R8YGF8;F6UVQ4;B7Z6I1;F8WB63;C9JZR7;C9JUM1;Q6S8J3;A5A3E0;F6QUT6;B8ZZJ2;C9JTX5;C9JFL5;P0CG38;F8WCH0;P0CG39;L0R5C4;A0A6Q8PGD7;A0A7P0TBL1	P63261	19	28	ACTG1;ACTB;PS1TP5BP1;ACTG2;ACTA1;ACTC1;ACTA2;POTEE;POTEF;POTEI;POTEJ;POTEM	Actin, cytoplasmic 2;Actin, cytoplasmic 2, N-terminally processed;Actin, cytoplasmic 1;Actin, cytoplasmic 1, N-terminally processed;Actin, gamma-enteric smooth muscle;Actin, alpha skeletal muscle;Actin, alpha cardiac muscle 1;Actin, aortic smooth muscle;POTE ankyrin domain family member E;POTE ankyrin domain family member F;POTE ankyrin domain family member I;POTE ankyrin domain family member J	yes	no	2	0.0053468	112.84		2	0	0	101	357	101	255;256;257;258;259;260	262;263;264;265;266;267	264			6	0	0
DALSDLALHFLNK	13	0	1455.77	B7Z9L0;B7Z2Z8;A8K3C3;P50991;B7Z2F4	B7Z9L0	251	263	CCT4	T-complex protein 1 subunit delta	yes	no	2;3	0.0014361	102.06		2	0	0	369	266	377	977;978	999;1000	999			2	0	0
DMLEGQDSKLPSSVR	15	1	1660.81	A0A3B3IT47;Q9Y2I8;E7EQ49;A0A087WTQ2	A0A3B3IT47	41	55	WDR37	WD repeat-containing protein 37	yes	no	2;3	8.9678e-05	103.88		2	0	0	465	203	475	1234;1235	1264;1265	1264		147	2	0	0
EHVIEALRR	9	1	1121.63	F8W7C6;X1WI28;X5D2T3;P27635;H7C123;H7C2C5;X5D7P1	F8W7C6	95	103	RPL10	60S ribosomal protein L10	yes	no	2;3	2.0393e-16	221.36		2	0	0	644	474	658	1751;1752;1753;1754;1755;1756;1757	1818;1819;1820;1821;1822;1823;1824	1822			7	0	0
FPGQLNADLR	10	0	1129.59	P07437;B4DY90;Q5SU16;A0A384NYT8;Q5JP53;B7ZAF0;Q1KSF8;Q6LC01;Q5ST81;B4E052;Q9BUU9;B7ZAK1;B4DQN9;B4DMU8;B4DXZ5;Q96B85;P68371;Q8IZ29;Q8N6N5;Q8IWP6;B3KML9;Q96HX0;P04350;B4DJ43;Q3ZCM7;B4DE77;A0A183YE00;M0R2D3	P68371	242	251	TUBB;XTP3TPATP1;TUBB4B;TUBB2C;TUBB4A;TUBB8	Tubulin beta chain;Tubulin beta-4B chain;Tubulin beta-4A chain;Tubulin beta-8 chain	no	no	2	0.0066399	120.99		2	0	0	893	587;200	908	2370;2371;2372;2373	2442;2443;2444;2445	2443			4	0	0
HIEIFTDLSSR	11	0	1316.67	P13010;C9JZ81;Q53TC2	P13010	131	141	XRCC5	X-ray repair cross-complementing protein 5	yes	no	2;3	1.4e-10	185.81		2	0	0	1235	524	1253	3248;3249;3250;3251;3252;3253	3344;3345;3346;3347;3348;3349	3347			6	0	0
IIALPHDNR	9	0	1047.58	A0A3B3IT47;Q9Y2I8	A0A3B3IT47	504	512	WDR37	WD repeat-containing protein 37	yes	no	2	0.0050042	134.08		2	0	0	1379	203	1398	3673;3674	3779;3780	3779			2	0	0
KRNEDEDSPNK	11	2	1330.61	B2R4C1;P62899;H7C2W9;C9JU56;B7Z4E3;B7Z4C8;Q76N53	B2R4C1	91	101	RPL31	60S ribosomal protein L31	yes	no	2;3	0.00258	102.06		2	0	0	1704	304	1740	4618;4619	4742;4743	4743			2	0	0
LLEVEHPAAK	10	0	1105.61	P17987;E7ERF2;F5GZI8;F5H726;F5H676;F5H136	P17987	64	73	TCP1	T-complex protein 1 subunit alpha	yes	no	2;3	0.0030287	111.82		2	0	0	1976	530	2021	5376;5377	5509;5510	5510			2	0	0
LLGPKGKAK	9	2	910.596	Q68DB0	Q68DB0	1	9	DKFZp781H1314		yes	yes	2;3	0.0080637	102.98		2	0	0	1984	627	2029	5402;5403;5404;5405;5406;5407	5535;5536;5537;5538;5539;5540	5539	130;131;132		6	0	0
QEEELQAKDEELLK	14	1	1700.85	P35580	P35580	850	863	MYH10	Myosin-10	yes	yes	2;3	4.6143e-18	176.18		2	0	0	2508	547	2558	6795;6796;6797	6956;6957;6958	6958			3	0	0
RFDDAVVQSDMK	12	1	1409.66	P11142;E9PKE3;V9HW22;Q53GZ6;Q96IS6;Q53HF2;E9PNE6;B4DTX2;E9PLF4;E9PK54;E9PQK7;E9PQQ4;E9PPY6;E9PN25;A4D111;E9PN89	P11142	77	88	HSPA8;HEL-S-72p;LOC401308	Heat shock cognate 71 kDa protein	no	no	2;3	0.00043555	138.63		2	0	0	2629	464;466	2679	7117;7118;7119	7284;7285;7286	7284		258	3	0	0
SLHDALCVIR	10	0	1182.62	Q96GI1;B4DE30;E7ENZ3;B4DYC8;B7ZAR1;B4DDU6;B4DZT5;B4DXI1;E9PCA1;Q9BU08;V9HW37;P48643;B4DX08;Q9HB74	Q96GI1	247	256	CCT5;HEL-S-69	T-complex protein 1 subunit epsilon	yes	no	2;3	0.0077057	101.54		2	0	0	2899	341	2957	7848;7849	8037;8038	8037			2	0	0
STLLELFGQIER	12	0	1404.76	A0A3B3IT47;Q9Y2I8;E7EQ49;A0A087WTQ2;C9JGR9	A0A3B3IT47	56	67	WDR37	WD repeat-containing protein 37	yes	no	2;3	1.3448e-26	194.54		2	0	479290000	3014	203	3075	8141;8142	8332;8333	8332			2	0	714110000
TKASHSTSQLSQK	13	1	1401.72	A0A3B3IT47;Q9Y2I8;E7EQ49;A0A087WTQ2;C9JGR9	A0A3B3IT47	109	121	WDR37	WD repeat-containing protein 37	yes	no	2;3	4.76e-99	263.19		2	0	13837000	3135	203	3197	8444;8445	8648;8649	8649			2	0	20617000
TNSTFNQVVLKR	12	1	1405.77	Q0QEW2;G3V203;H0YHA7;A0A024QZD1;J3QQ67;Q07020;F8VYV2;B4DDY5;A0A075B7A0	Q0QEW2	16	27	RPL18	60S ribosomal protein L18	yes	no	2;3	0.0013395	125.56		2	0	0	3196	4	3260	8642;8643;8644;8645;8646;8647	8854;8855;8856;8857;8858;8859	8857			6	0	0
TPVEPEVAIHR	11	0	1246.67	P60866;E5RIP1;E5RJX2;A0A7P0S5H5	P60866	9	19	RPS20	40S ribosomal protein S20	yes	no	2;3	0.00012052	156.92		2	0	0	3212	566	3276	8694;8695;8696;8697;8698	8906;8907;8908;8909;8910	8908			5	0	0
VAEIEHAEKEK	11	1	1281.66	F8VQ14;F5GWF6;V9HW96;P78371;B7Z4R3	F8VQ14	264	274	CCT2;HEL-S-100n	T-complex protein 1 subunit beta	yes	no	2;3	9.7965e-05	158.79		2	0	0	3282	469	3347	8896;8897	9114;9115	9115			2	0	0
AAIAQLNGKEVK	12	1	1240.71	A0A0S2Z4Z0;Q96PK6;Q59GV2;A0A0S2Z567	A0A0S2Z4Z0	127	138	RBM14	RNA-binding protein 14	yes	no	3	0.01424	58.172		1	0	0	12	149	12	30	30	30			1	0	0
AALQELLSK	9	0	971.565	P62851	P62851	86	94	RPS25	40S ribosomal protein S25	yes	yes	2	0.020575	103.56		1	0	30621000	14	581	14	32;33	32;33	32			2	0	45623000
AAQGEPQVQFK	11	0	1201.61	B5MDF5;P62826;A0A087X0W0	B5MDF5	2	12	RAN	GTP-binding nuclear protein Ran	yes	no	2	4.4852e-05	160.88		1	0	0	22	376	22	48;49	48;49	49			2	0	0
AAQMHSGYQR	10	0	1147.52	A0A0S2Z4Z0;Q96PK6;B4DNG4	A0A0S2Z4Z0	658	667	RBM14	RNA-binding protein 14	yes	no	2;3	0.00011143	154.35		1	0	0	23	149	23	50;51;52;53;54	50;51;52;53;54	54		108	5	0	0
ADLINNLGTIAK	12	0	1241.7	B4DMA2;P08238;B4DGL0;A0A024RD80;Q6PK50;O14942;B4DTA5;Q86SX1;Q58FF8;Q14568;Q2VPJ6;Q8TBA7;K9JA46;P07900	B4DMA2	96	107	HSP90AB1;HSP90AB2P;HSP90AA2P;HSP90AA1;EL52	Heat shock protein HSP 90-beta;Putative heat shock protein HSP 90-beta 2;Heat shock protein HSP 90-alpha A2;Heat shock protein HSP 90-alpha	no	no	2	0.0065376	98.048		1	0	0	46	92;504	46	108;109	110;111	110			2	0	0
AEAGDNLGALVR	12	0	1184.61	P49411;A0A384ME17	P49411	316	327	TUFM	Elongation factor Tu, mitochondrial	yes	no	2	1.1597e-08	168.83		1	0	0	61	186	61	149;150;151	152;153;154	153			3	0	0
AEKDNAEIR	9	1	1044.52	Q6IBT3;Q53HV2;Q99832;B7Z7I4;B7Z1C9	Q6IBT3	248	256	CCT7	T-complex protein 1 subunit eta	yes	no	2	0.024547	108.74		1	0	0	71	615	71	170	175	175			1	0	0
AGEVQEPELR	10	0	1126.56	A0A140VK00;P25311	A0A140VK00	242	251	AZGP1	Zinc-alpha-2-glycoprotein	yes	no	2	6.5585e-07	186.25		1	0	0	100	159	100	251;252;253;254	258;259;260;261	260			4	0	0
AGNLGGGVVTIER	13	0	1241.67	K7EP65;K7EKS7;K7ELC4;K7EMH1;K7ERI7;Q7Z4W8;P35268;K7EJT5	K7EP65	20	32	RPL22	60S ribosomal protein L22	yes	no	2	0.00066768	132.25		1	0	0	110	497	110	285;286;287;288;289	294;295;296;297;298	297			5	0	0
AGYSTDESSSSSLHATR	17	0	1754.77	P51116	P51116	407	423	FXR2	Fragile X mental retardation syndrome-related protein 2	yes	yes	3	6.1829e-06	89.866		1	0	0	121	564	122	328;329	337;338	338			2	0	0
AIADTGANVVVTGGK	15	0	1371.74	Q7Z759;Q53HU0;P50990;H7C4C8	Q7Z759	231	245	CCT8	T-complex protein 1 subunit theta	yes	no	2	0.00023275	110.64		1	0	0	125	563	126	340;341	349;350	350			2	0	0
AIEPPPLDAVIEAEHTLR	18	0	1970.05	Q08211;B3KU66	Q08211	820	837	DHX9	ATP-dependent RNA helicase A	yes	no	3	9.6699e-11	106.16		1	0	0	128	595	129	344;345	353;354	353			2	0	0
AILVDLEPGTMDSVR	15	0	1614.83	P07437;B4DY90;Q5SU16;A0A384NYT8;Q5JP53;B7ZAF0;Q6LC01	P07437	63	77	TUBB	Tubulin beta chain	no	no	2	0.0015054	80.245		1	0	0	136	200	137	364;365;366	373;374;375	373		141	3	0	0
AIVICPTDEDLKDR	14	1	1643.82	M0R3F1;A8K3W4;A0A024R0J9;A0A0A0MRA5;B7Z4B8;A8K6U7;Q9BUJ2;A8K5K0;B3KM60	M0R3F1	377	390	HNRNPUL1;HNRPUL1	Heterogeneous nuclear ribonucleoprotein U-like protein 1	yes	no	3	1.8228e-05	128.31		1	0	0	144	14	145	382;383;384;385	391;392;393;394	392			4	0	0
AKEEELRK	8	2	1001.55	B4DDX2;Q07666;B2R7B5;B4E043;A0A6Q8PGH5;B3KTS3;Q5VWX1;H0YAQ1;Q9H6N6;O75525;E5RG12;H0YAQ3;E5RJZ9	B4DDX2	187	194	KHDRBS1;KHDRBS2;KHDRBS3;MYH16	KH domain-containing, RNA-binding, signal transduction-associated protein 1;KH domain-containing, RNA-binding, signal transduction-associated protein 2;Putative uncharacterized protein MYH16;KH domain-containing, RNA-binding, signal transduction-associated protein 3	no	no	2	0.0064784	138.26		1	0	0	147	342;511	148	392;393	401;402	401			2	0	0
ALAAAGYDVEK	11	0	1106.56	Q4VB24;A3R0T8;P10412;B2R984;A3R0T7;Q02539;A1L407;P22492;P16402;P16403	P16403	65	75	HIST1H1E;HIST1H1A;HIST1H1T;HIST1H1D;HIST1H1C	Histone H1.4;Histone H1.1;Histone H1t;Histone H1.3;Histone H1.2	no	no	2	0.013539	93.111		1	0	0	159	528;255;527	160	413;414;415	422;423;424	422			3	0	0
ALEEALEAK	9	0	972.513	P35580	P35580	1491	1499	MYH10	Myosin-10	no	no	2	0.0023194	141.93		1	0	0	166	547	168	431;432;433	440;441;442	442			3	0	0
ALEEALEAKEEFER	14	1	1662.81	P35580	P35580	1491	1504	MYH10	Myosin-10	yes	yes	3	6.3566e-05	123.02		1	0	0	167	547	169	434	443	443			1	0	0
ALEEAMEQK	9	0	1047.49	A0A024R1N1;P35579;Q2PS10	A0A024R1N1	1484	1492	MYH9	Myosin-9	no	no	2	0.013322	94.302		1	0	0	168	22	170	435;436	444;445	445		8	2	0	0
ALELDGQSVK	10	0	1058.56	H3BS86;Q9UNE7	H3BS86	67	76	STUB1	E3 ubiquitin-protein ligase CHIP	yes	no	2	0.0018181	130.75		1	0	0	174	485	176	451	460	460			1	0	0
ALGKAASHIK	10	1	994.592	B4DEJ8;A2A2L6;A2A2L5;B2RB99;B4DXL5;A0A0A0MQR2;Q9BY42	B4DEJ8	74	83	RTFDC1	Protein RTF2 homolog	yes	no	3	0.027889	44.203		1	0	10253000	179	118	181	457	466	466	29		1	0	15276000
ALIAGGGAPEIELALR	16	0	1549.88	B7Z9L0;B7Z2Z8;A8K3C3;P50991;B7Z2F4	B7Z9L0	364	379	CCT4	T-complex protein 1 subunit delta	yes	no	2	2.5121e-06	104.87		1	0	0	181	266	183	463	472	472			1	0	0
AMGIMNSFVNDIFER	15	0	1742.81	A0A024RCL8;A8K9J7;A0A024QZZ7;I6L9F7;U3KQK0;A0A024RCJ9;Q99880;B2R4S9;Q99877;Q93079;Q5QNW6;P62807;P58876;O60814;Q99879;B4DR52;A0A024RCJ2;P57053;Q8N257;P33778;P23527;P06899;Q16778;Q0D2M2	A0A024RCL8	59	73	HIST1H2BK;HIST1H2BD;HIST1H2BM;HIST1H2BN;HIST1H2BL;HIST1H2BI;HIST1H2BH;HIST2H2BF;HIST1H2BC;HIST1H2BJ;H2BFS;HIST3H2BB;HIST1H2BB;HIST1H2BO;HIST2H2BE	Histone H2B;Histone H2B type 1-L;Histone H2B type 1-N;Histone H2B type 1-H;Histone H2B type 2-F;Histone H2B type 1-C/E/F/G/I;Histone H2B type 1-D;Histone H2B type 1-K;Histone H2B type 1-M;Histone H2B type F-S;Histone H2B type 3-B;Histone H2B type 1-B;Histone H2B type 1-O;Histone H2B type 1-J;Histone H2B type 2-E	yes	no	2;3	1.0877e-55	224.42		1	0	0	204	10	207	532;533;534;535;536	542;543;544;545;546	544		4;5	5	0	0
ANLQIDQINTDLNLER	16	0	1868.96	A0A024R1N1;P35579;Q6ZNL4	A0A024R1N1	1755	1770	MYH9;FLJ00279	Myosin-9	no	no	2;3	0	357.99		1	0	0	209	22	212	547;548;549;550;551	557;558;559;560;561	560			5	0	0
AQAALAVNISAAR	13	0	1254.7	Q59ET3;B2R9K8;A0A024RDL1;P40227	Q59ET3	14	26	CCT6A	T-complex protein 1 subunit zeta	yes	no	2	0.015927	78.653		1	0	0	224	97	228	605	616	616			1	0	0
AQPSVSLGAPYR	12	0	1244.65	A0A0S2Z4Z0;Q96PK6;Q59GV2	A0A0S2Z4Z0	275	286	RBM14	RNA-binding protein 14	yes	no	2	0.00089155	147.51		1	0	0	238	149	243	642;643;644;645;646	653;654;655;656;657	653			5	0	0
AQQACIEAK	9	0	1017.49	H3BS86;Q9UNE7;H3BUD0;H3BTA3	H3BS86	176	184	STUB1	E3 ubiquitin-protein ligase CHIP	yes	no	2	0.024417	103.83		1	0	0	239	485	244	647	658	658			1	0	0
ASLENSLR	8	0	888.466	F8VZY9;B2RA03;A0A024RAY2;P05783;I6L965;CON__H-INV:HIT000015463	F8VZY9	318	325	KRT18	Keratin, type I cytoskeletal 18	yes	no	2	0.010347	139.31		1	0	0	270	78	275	734	746	746			1	0	0
ASRDEIFAQSK	11	1	1250.63	P35580	P35580	1666	1676	MYH10	Myosin-10	yes	yes	2;3	1.8394e-59	222.8		1	0	0	279	547	286	759;760;761;762;763	771;772;773;774;775;776;777	774			7	0	0
ASREEILAQAK	11	1	1214.66	A0A024R1N1;P35579;Q6ZNL4	A0A024R1N1	1659	1669	MYH9;FLJ00279	Myosin-9	no	no	2	0.0026665	123.11		1	0	0	280	22	287	764;765;766	778;779;780	780			3	0	0
ATDKTFVEK	9	1	1037.54	P35580	P35580	544	552	MYH10	Myosin-10	yes	yes	2	0.0094132	128.27		1	0	0	291	547	298	787;788;789	803;804;805	803			3	0	0
ATENDIANFFSPLNPIR	17	0	1917.96	Q53F48;A0A024QZK8;P31942;B4DHY1;A0A024QZP1	Q53F48	206	222	HNRPH3;HNRNPH3	Heterogeneous nuclear ribonucleoprotein H3	yes	no	3	3.2661e-32	181.58		1	0	0	295	7	302	796;797;798	812;813;814	812			3	0	0
ATISALEAK	9	0	902.507	P35580	P35580	1814	1822	MYH10	Myosin-10	yes	yes	2	0.01894	110.22		1	0	0	301	547	308	809	825	825			1	0	0
ATLSSIR	7	0	746.429	P46779;H0YKD8;O60251	P46779	88	94	RPL28	60S ribosomal protein L28	yes	no	2	0.0095068	148.07		1	0	0	304	556	311	813;814;815;816	829;830;831;832	832			4	0	0
ATQALVLAPTR	11	0	1139.67	P60842;A8K7F6;J3KTB5;A8K088;Q59F68;J3KT12;J3QS69;J3QL43;J3QKZ9;J3QR64;J3KS25;B4E047;J3QLN6;B4E102	P60842	100	110	EIF4A1	Eukaryotic initiation factor 4A-I	yes	no	2	6.6833e-08	172.98		1	0	0	308	284	315	826;827;828	842;843;844	842			3	0	0
AVDDGVNTFK	10	0	1064.51	Q7Z759;Q53HU0;P50990	Q7Z759	340	349	CCT8	T-complex protein 1 subunit theta	yes	no	2	0.018063	92.439		1	0	0	318	563	325	847	863	863			1	0	0
AVDSLVPIGR	10	0	1025.59	V9HW26;P25705;K7EK77;B4DGW3;K7ERX7;K7ENJ4	V9HW26	195	204	HEL-S-123m;ATP5A1	ATP synthase subunit alpha;ATP synthase subunit alpha, mitochondrial	yes	no	2	0.0019256	130.27		1	0	0	321	536	328	850;851	866;867	866			2	0	0
AVLLAGPPGTGK	12	0	1079.63	E7ETR0;B3KRS7;B5BUB1;A0A384MTR5;Q9Y265	E7ETR0	5	16	RUVBL1	RuvB-like 1	yes	no	2	0.0045096	103.7		1	0	0	329	191	336	872	888	888			1	0	0
AVLVDLEPGTMDSVR	15	0	1600.81	P68371;Q8IZ29;Q8N6N5;Q8IWP6;B3KML9;P04350;B4DJ43;Q3ZCM7;B4DE77;A0A183YE00;M0R0X0;B4DNW1;M0QZL7;M0QX14;M0QY37;M0QY85;M0R278;A0A075B724	P68371	63	77	TUBB4B;TUBB2C;TUBB4A;TUBB8	Tubulin beta-4B chain;Tubulin beta-4A chain;Tubulin beta-8 chain	yes	no	2	0.0020252	77.744		1	0	0	330	587	337	873;874	889;890	889		326	2	0	0
CYEVGMMKGVTK	12	1	1401.65	B6DU70	B6DU70	53	64	ESR1		yes	yes	2	0.023087	56.916		1	0	0	354	377	361	928;929	945;946	946		219;220	2	0	0
DAGQISGLNVLR	12	0	1241.67	A0A7I2V2G2;A0A7I2V2S7;D6RCD7;B7Z4V2;V9HW84;A0A384P5G6;Q8N1C8;P38646;A0A7I2V3F7;B7Z1V7;A0A7I2YQB2;B7Z4T3;H0Y8K0	A0A7I2V2G2	138	149	HSPA9;HEL-S-124m	Stress-70 protein, mitochondrial	yes	no	2	2.1839e-09	175.73		1	0	0	365	201	373	960;961;962;963	982;983;984;985	984			4	0	0
DANGNSFATR	10	0	1051.47	Q96IR1;B2R491;P62701;Q53HV1;C9JEH7;A4FU11;Q496E4;Q8TD47;P22090;Q53HI6	Q96IR1	192	201	RPS4X;RPS4Y1;RPS4Y2	40S ribosomal protein S4;40S ribosomal protein S4, X isoform;40S ribosomal protein S4, Y isoform 2;40S ribosomal protein S4, Y isoform 1	yes	no	2	0.010909	98.033		1	0	0	370	302	378	979	1001	1001			1	0	0
DAVEDLESVGK	11	0	1160.56	P81605	P81605	86	96	DCD	Dermcidin;Survival-promoting peptide;DCD-1	yes	yes	2	0.0040942	103.7		1	0	0	374	590	382	988;989;990;991	1010;1011;1012;1013	1012			4	0	0
DEILPTTPISEQK	13	0	1469.76	Q53G83;P23396;E9PL09;E9PPU1;H0YEU2;Q9NQS8;E9PSF4	Q53G83	215	227	RPS3	40S ribosomal protein S3	yes	no	2	0.0026323	122.98		1	0	0	383	533	392	1020;1021;1022	1042;1043;1044	1044			3	0	0
DETNYGIPQR	10	0	1191.55	P63244;E9KL35;D6RFZ9;D6R9L0;D6RAC2;D6R9Z1;D6RHH4;B4DVD2;D6RFX4;E9PD14;D6RAU2;D6REE5;D6RBD0;B4DWC6;B4E0C3;D6R909;D6RGK8	P63244	48	57	GNB2L1	Guanine nucleotide-binding protein subunit beta-2-like 1;Guanine nucleotide-binding protein subunit beta-2-like 1, N-terminally processed	yes	no	2	0.0019256	130.27		1	0	0	389	457	398	1031;1032	1053;1054	1054			2	0	0
DFLAGGIAAAISK	13	0	1232.68	P12236;Q6I9V5;Q59EI9	P12236	11	23	SLC25A6	ADP/ATP translocase 3;ADP/ATP translocase 3, N-terminally processed	yes	no	2	0.0051703	90.653		1	0	0	392	523	401	1043;1044	1065;1066	1066			2	0	0
DFLAGGVAAAISK	13	0	1218.66	P05141;Q6NVC0	P05141	11	23	SLC25A5	ADP/ATP translocase 2;ADP/ATP translocase 2, N-terminally processed	yes	no	2	0.0028053	99.215		1	0	0	393	516	402	1045;1046;1047;1048	1067;1068;1069;1070	1069			4	0	0
DIDEVSSLLR	10	0	1145.59	Q7Z759;Q53HU0;P50990;H7C4C8	Q7Z759	105	114	CCT8	T-complex protein 1 subunit theta	yes	no	2	0.00065542	138.1		1	0	0	416	563	425	1102	1125	1125			1	0	0
DIEREDIEFICK	12	1	1565.74	B7Z9L0;B7Z2Z8;A8K3C3;P50991;B7Z2F4	B7Z9L0	271	282	CCT4	T-complex protein 1 subunit delta	yes	no	3	0.0066967	71.176		1	0	0	418	266	427	1107	1130	1130			1	0	0
DITVLDLGCGK	11	0	1189.6	A8K946;O43148;Q05D80;Q05DQ2;K7EP06;B7Z8S9	A8K946	198	208	RNMT	mRNA cap guanine-N7 methyltransferase	yes	no	2	0.0041062	103.55		1	0	0	426	287	435	1122;1123;1124	1145;1146;1147	1147			3	0	0
DKLNNLVLFDK	11	1	1317.73	P62851	P62851	42	52	RPS25	40S ribosomal protein S25	yes	yes	2	1.34e-27	221.55		1	0	0	431	581	441	1152;1153;1154;1155;1156	1182;1183;1184;1185;1186	1185			5	0	0
DLEAHIDSANK	11	0	1211.58	A0A024R1N1;P35579;Q6ZNL4	A0A024R1N1	1621	1631	MYH9;FLJ00279	Myosin-9	no	no	2	1.1705e-13	194.94		1	0	0	438	22	448	1165;1166;1167	1195;1196;1197	1197			3	0	0
DLEAQIEAANK	11	0	1200.6	P35580	P35580	1628	1638	MYH10	Myosin-10	yes	yes	2	4.2371e-05	160.59		1	0	0	440	547	450	1169;1170;1171	1199;1200;1201	1201			3	0	0
DLSAAGIGLLAAATQSLSMPASLGR	25	0	2370.26	P43243;A8MXP9;A0A0R4J2E8;Q68D11;D6REM6;D6R991;D6R8Z5;A0A1B0GX04;D6REK4;D6RCM3;D6RBS2;D6R9F3;D6RB45	P43243	20	44	MATR3;DKFZp686K23100	Matrin-3	yes	no	3	4.9019e-10	88.239		1	0	0	460	144	470	1225;1226	1255;1256	1256		105	2	0	0
DMLEGQDSK	9	0	1021.44	A0A3B3IT47;Q9Y2I8;E7EQ49;A0A087WTQ2	A0A3B3IT47	41	49	WDR37	WD repeat-containing protein 37	yes	no	2	0.0028545	131.03		1	0	0	464	203	474	1233	1263	1263		147	1	0	0
DNLAEDIMR	9	0	1075.5	P08670;V9HWE1;B0YJC4;Q53HU8;B3KRK8	P08670	176	184	VIM;HEL113	Vimentin	yes	no	2	0.013842	93.429		1	0	0	472	518	484	1269	1299	1299		282	1	0	0
DQLSVLENGVDIVVGTPGR	19	0	1967.03	A0A7I2V430;A0A7I2V4F0;A3RJH1;Q92499;A0A087WZ71;F1T0B3;A0A7I2V2M5;A0A087X2G1;A0A7I2YQ77;B4DP70;A0A7I2V4J3	A0A7I2V430	288	306	DDX1	ATP-dependent RNA helicase DDX1	yes	no	3	3.0188e-81	225.11		1	0	0	479	232	491	1284;1285	1314;1315	1315			2	0	0
DQTPDENDQVIVK	13	0	1499.71	Q9NZI8;D3DTW3	Q9NZI8	526	538	IGF2BP1	Insulin-like growth factor 2 mRNA-binding protein 1	yes	no	2	2.2735e-14	179.42		1	0	0	480	681	492	1286;1287	1316;1317	1316			2	0	0
DQTPDENDQVVVK	13	0	1485.69	O00425	O00425	526	538	IGF2BP3	Insulin-like growth factor 2 mRNA-binding protein 3	yes	yes	2	0.00041405	146.11		1	0	0	481	506	493	1288;1289	1318;1319	1318			2	0	0
DSLDPSFTHALR	12	0	1357.66	O75525	O75525	14	25	KHDRBS3	KH domain-containing, RNA-binding, signal transduction-associated protein 3	yes	yes	3	0.0098455	64.55		1	0	0	495	511	507	1345;1346	1376;1377	1376			2	0	0
DTEPLIQTAK	10	0	1114.59	Q96GI1;B4DE30;E7ENZ3;B4DYC8;B7ZAR1;B4DDU6;B4DZT5;B4DXI1;E9PCA1;Q9BU08;V9HW37;P48643	Q96GI1	7	16	CCT5;HEL-S-69	T-complex protein 1 subunit epsilon	yes	no	2	0.0057357	122.52		1	0	0	507	341	520	1382	1420	1420			1	0	0
DVDFELIKVEGK	12	1	1390.73	Q96GI1;B4DE30;E7ENZ3;B4DYC8;B7ZAR1;B4DDU6;B4DZT5;B4DXI1;E9PCA1;Q9BU08;V9HW37;P48643;B4DX08;B4DZY9	Q96GI1	49	60	CCT5;HEL-S-69	T-complex protein 1 subunit epsilon	yes	no	2	0.00035741	152.04		1	0	0	514	341	527	1404	1442	1442			1	0	0
DVFRDPALK	9	1	1059.57	E4W6B6;B2R4D8;A0A024R1V4;P61353;K7ELC7;Q6LCU2	E4W6B6	99	107	RPL27	60S ribosomal protein L27	yes	no	3	0.017426	64.711		1	0	0	520	26	533	1415;1416;1417	1458;1459;1460	1459			3	0	0
DVIAQSQSGTGK	12	0	1189.59	P38919;A0A024R8W0;I3L3H2	P38919	77	88	EIF4A3;DDX48	Eukaryotic initiation factor 4A-III;Eukaryotic initiation factor 4A-III, N-terminally processed	yes	no	2	1.9064e-14	190.88		1	0	0	522	67	535	1419;1420;1421;1422	1462;1463;1464;1465	1465			4	0	0
DVLLQVDDERR	11	1	1356.7	A0A024R1N1;P35579;Q6ZNL4	A0A024R1N1	1846	1856	MYH9;FLJ00279	Myosin-9	no	no	2;3	3.2284e-59	221.52		1	0	0	525	22	538	1425;1426;1427;1428	1468;1469;1470;1471	1471			4	0	0
DVQIGDIVTVGECRPLSK	18	1	1985.03	P62280;M0R1H5	P62280	119	136	RPS11	40S ribosomal protein S11	yes	no	3	2.7492e-07	85.808		1	0	0	531	574	544	1446;1447;1448	1496;1497;1498	1498			3	0	0
EAAEQDVEK	9	0	1017.46	Q6NZ55;A8K4C8;P26373;J3KS98	Q6NZ55	201	209	RPL13	60S ribosomal protein L13	yes	no	2	0.011811	122.19		1	0	0	536	270	549	1461;1462;1463;1464;1465	1511;1512;1513;1514;1515	1513			5	0	0
EAATAVEQEK	10	0	1074.52	B3KM36;B3KN59;O95816	B3KM36	44	53	BAG2	BAG family molecular chaperone regulator 2	yes	no	2	0.007013	117.81		1	0	0	542	324	555	1477	1527	1527			1	0	0
EAPPMEKPEVVK	12	1	1352.7	K7EQJ5;P62841;K7EM56;A0A0B4J2B4;S4R417;K7ELC2;K7EJ78;S4R456	K7EQJ5	66	77	RPS15	40S ribosomal protein S15	yes	no	3	0.017359	54.343		1	0	0	565	502	578	1534;1535	1593;1594	1593		277	2	0	0
EDDVGTGAGLLEIK	14	0	1415.71	B3KX11;Q59H77;P49368;B4DUR8	B3KX11	317	330	CCT3	T-complex protein 1 subunit gamma	yes	no	2	0.0011461	91.937		1	0	0	576	335	589	1562	1622	1622			1	0	0
EDSARPGAHAK	11	1	1137.55	Q13151	Q13151	86	96	HNRNPA0	Heterogeneous nuclear ribonucleoprotein A0	yes	yes	2	0.00081878	136.99		1	0	0	590	601	604	1593;1594;1595;1596	1654;1655;1656;1657	1655			4	0	0
EEAENTLQSFR	11	0	1322.61	P08670;V9HWE1;B0YJC4;Q53HU8;B3KRK8;B0YJC5	P08670	197	207	VIM;HEL113	Vimentin	yes	no	2	1.401e-87	259.54		1	0	0	598	518	612	1627;1628;1629	1688;1689;1690	1690			3	0	0
EEASGSSVTAEEAK	14	0	1393.62	P13010;Q53T09	P13010	689	702	XRCC5	X-ray repair cross-complementing protein 5	yes	no	2	7.3816e-18	172.8		1	0	0	601	524	615	1634;1635;1636;1637;1638	1695;1696;1697;1698;1699	1698			5	0	0
EFENLYIENLELR	13	0	1680.84	A0A3B3IT47;Q9Y2I8;E7EQ49;A0A087WTQ2;C9JGR9	A0A3B3IT47	68	80	WDR37	WD repeat-containing protein 37	yes	no	2	3.0381e-55	234.92		1	0	0	616	203	630	1675	1736	1736			1	0	0
EGAFSNFPISEETIK	15	0	1667.8	Q9NR30;B4DED6;K0J110;Q9BQ39;B4DW97;Q53FI9	Q9NR30	185	199	DDX21;mcdrh;DDX50	Nucleolar RNA helicase 2;ATP-dependent RNA helicase DDX50	no	no	2	2.5144e-18	172.17		1	0	0	622	673;344	636	1696;1697;1698;1699	1757;1758;1759;1760	1760			4	0	0
EGDVLTLLESER	12	0	1359.69	B2R4R9;P62857	B2R4R9	52	63	RPS28	40S ribosomal protein S28	yes	no	2	0.0023421	128.17		1	0	0	623	309	637	1700;1701;1702	1761;1762;1763	1761			3	0	0
EGRPSGEAFVELESEDEVK	19	1	2105.98	P31943;A0A384MEJ3;G8JLB6;E9PCY7;D6RIU0;D6RBM0;D6RIH9;D6RJ04;D6RDU3;E7EN40;D6RIT2;D6RFM3;D6R9T0;D6RAM1;E7EQJ0;D6RDL0	P31943	50	68	HNRNPH1	Heterogeneous nuclear ribonucleoprotein H;Heterogeneous nuclear ribonucleoprotein H, N-terminally processed	yes	no	3	3.2509e-15	114.4		1	0	7914300	631	189	645	1719;1720;1721;1722;1723	1781;1782;1783;1784;1785;1786;1787;1788;1789;1790	1789			10	0	11792000
EHALLAYTLGVK	12	0	1313.73	Q5VTE0;P68104;A0A4D5RAC7;A0A4D5RAN2;A0A4D5RA76;A0A4D5RAC9;A0A7I2V659;A0A7I2V3H3;A0A087WVQ9;Q53HM9;A0A7I2V5N4;Q53GE9;Q53G85;Q53HR5;Q6IPN6;Q6IPS9;Q6IPT9;A0A4D5RA98;A0A4D5RBG5;Q53HQ7;A0A2U3TZH3;Q05639;A8K9C4;Q53GA1;A0A4D5RA52;Q53G89;A0A4D5RAF1;A0A4D5RBK4;A0A4D5RBI9;A0A2R8Y488;A0A087WV01;A0A4D5RA61;Q9H2I7;Q8IUB0;A0A2R8Y660;A0A4D5RAE2;Q96RE1;Q9NZS6;B4DV42;Q53HR1;Q59GP5;Q16577;A9X7H1	Q5VTE0	135	146	EEF1A1P5;EEF1A1;EEF1A2;EEF1A1L14;PTI-1	Putative elongation factor 1-alpha-like 3;Elongation factor 1-alpha 1;Elongation factor 1-alpha;Elongation factor 1-alpha 2	yes	no	2;3	1.5449e-05	158.79		1	0	0	636	105	650	1732;1733;1734;1735	1799;1800;1801;1802	1799			4	0	0
EIEVGGGRK	9	1	943.509	P62081;B5MCP9	P62081	50	58	RPS7	40S ribosomal protein S7	yes	no	2	0.011276	113.7		1	0	0	649	569	663	1779;1780;1781;1782;1783	1846;1847;1848;1849;1850	1848			5	0	0
EIVHLQAGQCGNQIGAK	17	0	1821.92	P68371;Q8IZ29;Q8N6N5;Q8IWP6;P04350;B4DJ43;B4DFH6;M0R0X0;B4DNW1;M0QZL7;M0R2D3;M0QX14;M0QY37;M0QY85;M0R278;M0R2T4;M0QYM7;M0R042	P68371	3	19	TUBB4B;TUBB2C;TUBB4A	Tubulin beta-4B chain;Tubulin beta-4A chain	yes	no	2	5.3218e-43	198.81		1	0	0	659	587	673	1811;1812;1813	1879;1880;1881	1881			3	0	0
EKLHGTVVEGR	11	1	1223.66	B0QYV1;A0A6Q8PHA3;X5D7T5;J3KNW3;A0A6Q8PFM4;X5DNY3;B7Z1U7;F8VZG9;A0A0G2JRA5;F8VZY7;Q9NWB1;O43251;A0A286YEU2;A0A087X2B1;A0A6Q8PH77;A0A6Q8PGE0;Q59HD3;Q8TCM0;F8VR27;S4R469;B0QYY4;B7ZLH9;X5DP44;F8WSN4;I3L1D4;F8VRS4;S4R3K7;A0A0G2JRD1	B0QYV1	149	159	RBFOX2;RBFOX1;DKFZp547L059;A2BP1	RNA binding protein fox-1 homolog;RNA binding protein fox-1 homolog 1;RNA binding protein fox-1 homolog 2	yes	no	2;3	0.00069954	152.54		1	0	0	665	115	679	1820;1821;1822;1823;1824;1825	1888;1889;1890;1891;1892;1893	1891			6	0	0
ELAEQTLNNIK	11	0	1271.67	A0A7I2V430;A0A7I2V4F0;A3RJH1;Q92499;A0A087WZ71;F1T0B3;A0A7I2V2M5;A0A087X2G1;A0A7I2YQ77;B4DP70;A0A7I2V4J3;A0A7I2V421;A0A7I2V5X8	A0A7I2V430	254	264	DDX1	ATP-dependent RNA helicase DDX1	yes	no	2	2.4985e-36	230.7		1	0	0	679	232	693	1846;1847;1848;1849	1914;1915;1916;1917	1915			4	0	0
ELDALDANDELTPLGR	16	0	1740.85	Q08211;B3KU66	Q08211	838	853	DHX9	ATP-dependent RNA helicase A	yes	no	2	5.6776e-09	137.59		1	0	0	683	595	697	1857;1858	1925;1926	1926			2	0	0
ELEAELEDERK	11	1	1359.65	P35580	P35580	1600	1610	MYH10	Myosin-10	yes	yes	2;3	2.4398e-58	246.41		1	0	0	687	547	701	1869;1870;1871;1872	1937;1938;1939;1940	1940			4	0	0
ELEDATETADAMNR	14	0	1564.67	A0A024R1N1;P35579;Q6ZNL4	A0A024R1N1	1899	1912	MYH9;FLJ00279	Myosin-9	no	no	2	0.00024446	121.08		1	0	0	689	22	703	1874;1875;1876	1942;1943;1944	1944		9	3	0	0
ELESQISELQEDLESER	17	0	2032.94	A0A024R1N1;P35579;Q86XU5;Q99529	A0A024R1N1	1108	1124	MYH9	Myosin-9	no	no	3	6.844e-38	188.44		1	0	0	691	22	705	1880;1881	1948;1949	1949			2	0	0
ELLELDSVETGGQDSVR	17	0	1845.9	O95429	O95429	419	435	BAG4	BAG family molecular chaperone regulator 4	yes	yes	2	1.5271e-92	243.53		1	0	0	705	514	719	1902;1903	1970;1971	1970			2	0	0
ELTAVVQKR	9	1	1042.61	Q53G83;P23396;E9PL09;F2Z2S8;E9PPU1;H0YCJ7;E9PQ96;E9PJH4;H0YF32;E9PK82;A7E2S3	Q53G83	68	76	RPS3	40S ribosomal protein S3	yes	no	2	0.0013577	143		1	0	0	716	533	730	1933;1934	2001;2002	2002			2	0	0
ENAGEDPGLAR	11	0	1127.52	P81605	P81605	43	53	DCD	Dermcidin;Survival-promoting peptide;DCD-1	yes	yes	2	0.00010619	157.59		1	0	0	718	590	732	1937;1938;1939	2005;2006;2007	2005			3	0	0
ENSTHFSQPNSTK	13	0	1475.66	B4DFH8;X5DQX7;Q06787;R9WQY1;A8MQB8;G3V0J0;X5D907;R9WPL0;A0A087WXI3	X5DQX7	360	372	FMR1	Fragile X mental retardation protein 1	no	no	2	7.2732e-45	229		1	0	0	722	594;296;346	736	1948;1949;1950	2016;2017;2018	2018			3	0	0
EPLSLINVR	9	0	1039.6	Q96HS1	Q96HS1	66	74	PGAM5	Serine/threonine-protein phosphatase PGAM5, mitochondrial	yes	yes	2	0.0013639	150.84		1	0	0	727	657	741	1958;1959;1960;1961;1962	2026;2027;2028;2029;2030	2029			5	0	0
EQADFALEALAK	12	0	1304.66	Q7Z406;M0QY43;B3KWH4	Q7Z406	434	445	MYH14	Myosin-14	yes	no	2	0.0049396	101.38		1	0	0	732	637	746	1973;1974;1975;1976	2041;2042;2043;2044	2042			4	0	0
EQEVNILKK	9	1	1099.62	A0A024R1N1;P35579;Q86XU5	A0A024R1N1	1166	1174	MYH9	Myosin-9	no	no	2	0.0023003	137.9		1	0	0	738	22	752	1988;1989;1990	2056;2057;2058	2057			3	0	0
EQLEEEEEAKHNLEK	15	1	1853.86	A0A024R1N1;P35579;Q86XU5	A0A024R1N1	1343	1357	MYH9	Myosin-9	no	no	2;3	3.9079e-06	142.1		1	0	0	746	22	760	2007;2008	2075;2076	2075			2	0	0
EQLMREEAEQKR	12	2	1545.76	Q14444;E9PLA9;G3V153;B3KXU8	Q14444	134	145	CAPRIN1	Caprin-1	yes	no	3	0.00030463	130.56		1	0	0	749	605	763	2014;2015;2016;2017	2082;2083;2084;2085	2084		335	4	0	0
EREAELGAK	9	1	1001.51	Q6IQ30;A0A7I2V4L7;Q13310;A0A7I2V598;B1ANR0;A0A7I2V5W9;H0Y5F5;H0YCC8	Q6IQ30	178	186	PABPC4	Polyadenylate-binding protein;Polyadenylate-binding protein 4	yes	no	2	0.0027283	173.39		1	0	0	752	628	766	2022;2023	2090;2091	2091			2	0	0
ETEGDVTSVK	10	0	1063.5	Q7Z759;Q53HU0;P50990	Q7Z759	175	184	CCT8	T-complex protein 1 subunit theta	yes	no	2	0.012463	96.331		1	0	0	773	563	787	2065	2133	2133			1	0	0
EVMLVGIGDK	10	0	1059.56	B4DL14;Q8TAS0;P36542;B4DFE6	B4DL14	80	89	ATP5C1	ATP synthase subunit gamma;ATP synthase subunit gamma, mitochondrial	yes	no	2	0.026447	55.461		1	0	4057600	793	350	808	2111	2179	2179		211	1	0	6045600
EVPAVPETLKK	11	1	1209.7	A0A024R814;P18124	A0A024R814	21	31	RPL7	60S ribosomal protein L7	yes	no	2	0.011643	90.696		1	0	0	795	62	810	2114;2115	2182;2183	2183			2	0	0
FAANPNQNK	9	0	1002.49	Q15717	Q15717	183	191	ELAVL1	ELAV-like protein 1	yes	yes	2	0.00060983	178.65		1	0	0	803	608	818	2134;2135;2136	2205;2206;2207	2206			3	0	0
FAEAFEAIPR	10	0	1149.58	Q7Z759;Q53HU0;P50990	Q7Z759	390	399	CCT8	T-complex protein 1 subunit theta	yes	no	2	0.0072056	118.5		1	0	0	807	563	822	2148	2219	2219			1	0	0
FAGVDIR	7	0	776.418	P62249;M0R210;M0R3H0;M0R1M5;Q6IPX4;M0QX76;B4DP32	P62249	63	69	RPS16	40S ribosomal protein S16	yes	no	2	0.01757	132.72		1	0	0	808	571	823	2149;2150;2151;2152	2220;2221;2222;2223	2220			4	0	0
FATEAAITILR	11	0	1204.68	P17987;F5H282;E7EQR6	P17987	516	526	TCP1	T-complex protein 1 subunit alpha	yes	no	2	0.0040942	103.7		1	0	0	814	530	829	2164;2165	2235;2236	2236			2	0	0
FDDAVVQSDMK	11	0	1253.56	P11142;E9PKE3;V9HW22;Q53GZ6;Q96IS6;Q53HF2;E9PNE6;B4DTX2;E9PLF4;E9PK54;E9PQK7;E9PQQ4;E9PPY6;E9PN25;A4D111;E9PN89	P11142	78	88	HSPA8;HEL-S-72p;LOC401308	Heat shock cognate 71 kDa protein	no	no	2	0.0060071	93.096		1	0	0	816	464;466	831	2171;2172	2242;2243	2242		258	2	0	0
FDQLLAEEK	9	0	1091.55	A0A024R1N1;P35579;P35580;Q7Z406;A1L2Z2;B4E177;A0A0C4DFM8	P35580	1453	1461	MYH9;MYH10;MYH14	Myosin-9;Myosin-10;Myosin-14	no	no	2	0.0013624	151.44		1	0	0	820	547;22;637	835	2176;2177;2178	2247;2248;2249	2248			3	0	0
FEELNADLFR	10	0	1252.61	P11142;E9PKE3;V9HW22;Q53GZ6;B3KTV0;Q96IS6;Q53HF2;E9PNE6;B4E1Q1;A8K7Q2;A0A024R6B5;A0A384MDT7;P54652;B3KUS2;E9PN89	P11142	302	311	HSPA8;HEL-S-72p;HSPA2	Heat shock cognate 71 kDa protein;Heat shock-related 70 kDa protein 2	no	no	2	1.1405e-08	195.27		1	0	0	825	464;466	840	2190;2191;2192;2193	2261;2262;2263;2264	2262			4	0	0
FELTGIPPAPR	11	0	1196.66	P11142;E9PKE3;V9HW22;Q53GZ6;B3KTV0;Q96IS6;E9PNE6;B4E1Q1;A8K7Q2;E9PS65;Q96BE0;E9PM13;Q96H53	P11142	459	469	HSPA8;HEL-S-72p	Heat shock cognate 71 kDa protein	yes	no	2	0.028815	83.265		1	0	0	831	464	846	2206	2277	2277			1	0	0
FGEVVDCTLKLDPITGR	17	1	1918.98	A0A024RDF4;A1LU37;Q14103;H0Y8G5;H0YA96;D6RAF8;D6RD83;D6RF44;Q12771;B4DTC3;A0A024RDB4;D6RBQ9	A0A024RDF4	120	136	HNRPD;HNRNPD	Heterogeneous nuclear ribonucleoprotein D0	no	no	3	8.0967e-08	123.97		1	0	0	843	96;94	858	2239;2240;2241	2311;2312;2313	2311			3	0	0
FGNPGEK	7	0	747.355	P17844;J3KTA4;B5BUE6;B4DNG2;A0A7I2V2S0;A0A7I2V507;Q7Z2V5;Q59E92;J3QRQ7;C1IK54;J3QR02;J3KTQ4;X6RLV5;J3QKN9	P17844	34	40	DDX5;DKFZp686J01190;DDX5-ETV4 fusion	Probable ATP-dependent RNA helicase DDX5	yes	no	2	0.028552	124.37		1	0	0	847	529	862	2250;2251	2322;2323	2322			2	0	0
FGQGGAGPVGGQGPR	15	0	1340.66	Q9BSV4;Q86VG2;A0A384N5Z8;P23246	Q9BSV4	594	608	SFPQ	Splicing factor, proline- and glutamine-rich	yes	no	2	1.4351e-18	175.43		1	0	0	848	193	863	2252;2253;2254;2255;2256	2324;2325;2326;2327;2328	2327			5	0	0
FGQGVDNAAGQAGNEAGR	18	0	1717.78	Q6UWP8	Q6UWP8	152	169	SBSN	Suprabasin	yes	yes	2	7.4612e-10	110.92		1	0	0	849	633	864	2257;2258;2259	2329;2330;2331	2331			3	0	0
FICEQDHQNFLR	12	0	1605.74	B4DY72;B4DF68;A0A0A0MSM0;A0A024RDQ0;A0A024RDS1;Q92598	B4DY72	475	486	HSPH1	Heat shock protein 105 kDa	yes	no	3	0.0037974	78.692		1	0	0	857	98	872	2282	2354	2354			1	0	0
FLDDLGNAK	9	0	991.497	B3KM36;B3KN59;O95816	B3KM36	124	132	BAG2	BAG family molecular chaperone regulator 2	yes	no	2	0.0014305	155.51		1	0	0	869	324	884	2302;2303	2374;2375	2374			2	0	0
FQEAEERPK	9	1	1132.55	B4DY72;B4DF68;A0A0A0MSM0;A0A024RDQ0;A0A024RDS1;Q92598	B4DY72	525	533	HSPH1	Heat shock protein 105 kDa	yes	no	3	0.0094736	76.679		1	0	0	895	98	910	2375	2447	2447			1	0	0
FQLEELR	7	0	933.492	A0A024QZC0;A0A024QZB7;A0A024QZ91;Q8WWM7;H3BUF6	Q8WWM7	540	546	ATXN2L	Ataxin-2-like protein	no	no	2	0.0016825	154.09		1	0	0	898	649;3	913	2384;2385;2386;2387;2388	2456;2457;2458;2459;2460	2459			5	0	0
FSELTAEK	8	0	923.46	Q96GI1;B4DE30;E7ENZ3;B4DYC8;B7ZAR1;B4DDU6;B4DZT5;B4DXI1;E9PCA1;Q9BU08;V9HW37;P48643;B4DX08;B4DZY9	Q96GI1	191	198	CCT5;HEL-S-69	T-complex protein 1 subunit epsilon	yes	no	2	0.026436	123.69		1	0	0	906	341	921	2411;2412	2483;2484	2483			2	0	0
FSGSGSGTDFTLK	13	0	1302.61	A0A5C2G1Q3;A0A5C2G5M4;A0A5C2GUJ4;A0A5C2GRE3;A0A5C2GBS2;A0A5C2GXR5;A0A5C2FXT6;A0A5C2H1A1;A0A5C2GC73;A0A5C2G0H2;A0A5C2G8H2;A0A5C2GVB4;A0A5C2GWK8;A0A5C2GK11;A0A5C2GVZ1;A0A5C2GJ49;A0A5C2GA35;A0A5C2GA20;A0A5C2G875;A0A5C2G7B9;A0A5C2G704;A0A5C2G6U0;A0A5C2G6R2;A0A5C2G6F8;A0A5C2GVW6;A0A5C2G4U8;A0A5C2G3F1;A0A5C2G2J6;A0A5C2G945;A0A5C2GBP1;A0A5C2G1M9;A0A5C2G931;A0A5C2G980;A0A5C2GVX5;A0A5C2GRW0;A0A5C2FZ78;A0A…	A0A5C2G1Q3	67	79	IGKV2-40;IGKV2D-28;IGKV2D-26;IGKV2D-30;IGKV2D-29;IGKV A18;VKA17	Ig kappa chain V-II region Cum;Ig kappa chain V-II region FR;Ig kappa chain V-II region RPMI 6410	yes	no	2	1.2581e-23	201.75		1	0	0	908	218	923	2417;2418;2419	2489;2490;2491	2490			3	0	0
FSPAGPVLSIR	11	0	1142.64	Q6IQ30;A0A7I2V4L7;Q13310;B1ANR0;B1ANR1	Q6IQ30	31	41	PABPC4	Polyadenylate-binding protein;Polyadenylate-binding protein 4	yes	no	2	0.00043539	153.05		1	0	0	913	628	928	2434;2435;2436;2437	2506;2507;2508;2509	2509			4	0	0
GAFGKPQGTVAR	12	1	1187.64	F8W7C6;X1WI28;X5D2T3;P27635;H7C123;H7C2C5;Q96L21	F8W7C6	66	77	RPL10;RPL10L	60S ribosomal protein L10;60S ribosomal protein L10-like	yes	no	2	0.0054825	121.6		1	0	0	938	474	953	2508;2509;2510;2511;2512	2580;2581;2582;2583;2584	2580			5	0	0
GATYGKPVHHGVNQLK	16	1	1704.91	B4DLP4;A0A024R2Q4;P61313;E7EX53;A0A2R8Y738;A0A2R8YEM3;E7EQV9;B4DEN1;E7ENU7;A4D1Q5	B4DLP4	78	93	RPL15;LOC136321	Ribosomal protein L15;60S ribosomal protein L15	yes	no	3	0.011982	54.402		1	0	0	944	35	959	2526	2598	2598			1	0	0
GCALQCAILSPAFK	14	0	1534.76	B4DY72;B4DF68;A0A0A0MSM0;A0A024RDQ0;A0A024RDS1;Q92598;D6RJ96;B3KNM0;B4DZB4;E9PDE8;B4DXT2;Q53ZP9;A0A140VKE7;B4DZR0;O95757	B4DY72	194	207	HSPH1;HSPA4L	Heat shock protein 105 kDa;Heat shock 70 kDa protein 4L	no	no	2	0.00017017	127.42		1	0	0	947	98	962	2530	2602	2602			1	0	0
GCGTVLLSGPR	11	0	1115.58	Q0QEW2;G3V203;H0YHA7;A0A024QZD1;J3QQ67;Q07020;F8VUA6	Q0QEW2	110	120	RPL18	60S ribosomal protein L18	yes	no	2	0.0039526	123.35		1	0	0	949	4	964	2532;2533;2534	2604;2605;2606	2605			3	0	0
GDADQASNILASFGLSAR	18	0	1791.88	P43243;A8MXP9;A0A0R4J2E8;Q68D11;D6REM6;D6R991	P43243	103	120	MATR3;DKFZp686K23100	Matrin-3	yes	no	3	3.1621e-14	103.67		1	0	5480100	952	144	967	2544;2545;2546;2547	2618;2619;2620;2621	2621			4	0	8165000
GDVTITNDGATILK	14	0	1416.75	B7Z9L0;B7Z2Z8;A8K3C3;P50991	B7Z9L0	10	23	CCT4	T-complex protein 1 subunit delta	yes	no	2	0.0019641	88.441		1	0	0	961	266	976	2566	2640	2640			1	0	0
GEDSVPDTVHHVVVPVNPK	19	0	2024.03	A0A7I2V430;A0A7I2V4F0;A3RJH1;Q92499;A0A087WZ71;F1T0B3;A0A7I2V2M5;A0A087X2G1;A0A7I2YQ77;B4DP70;A0A7I2V4J3	A0A7I2V430	390	408	DDX1	ATP-dependent RNA helicase DDX1	yes	no	3	3.6008e-11	117.18		1	0	0	967	232	982	2584	2658	2658			1	0	0
GFCFITFKEEEPVKK	15	2	1857.93	A0A024RDF4;A1LU37;Q14103;H0Y8G5;H0YA96;B4E0W4;Q12771;B4DTC3;A0A024RDB4	A0A024RDF4	224	238	HNRPD;HNRNPD	Heterogeneous nuclear ribonucleoprotein D0	no	no	3	5.1164e-05	109.84		1	0	0	980	96;94	995	2613	2687	2687			1	0	0
GFGDVGEAK	9	0	878.413	B4DYY5;F8W726;Q14157;B4DZJ6	B4DYY5	356	364	UBAP2L	Ubiquitin-associated protein 2-like	yes	no	2	0.016502	87.251		1	0	10208000	982	362	997	2617;2618	2691;2692	2692			2	0	15209000
GFGFVTFDDHDPVDKIVLQK	20	1	2276.15	A0A7I2V4I6;P22626;A0A7I2V4S4;A0A7I2V4N1;A0A7I2V3P1;A0A7I2V3P7;A0A7I2V323;A0A384NL58;A0A087WUI2;A0A024RA28;I6L957	A0A7I2V4I6	154	173	HNRNPA2B1;HNRPA2B1	Heterogeneous nuclear ribonucleoproteins A2/B1	yes	no	3	5.7578e-16	102.58		1	0	0	990	233	1005	2640	2714	2714			1	0	0
GFGSEEGSR	9	0	924.394	Q9Y5S9;A0A023T787	Q9Y5S9	39	47	RBM8A;RBM8	RNA-binding protein 8A	yes	no	2	0.0052324	133.6		1	0	0	992	1	1007	2647;2648;2649	2721;2722;2723	2723			3	0	0
GGSGSGPTIEEVD	13	0	1203.53	P0DMV8;P0DMV9;A0A0G2JIW1;A8K5I0;A0A1U9X7W4;B4DFN9;Q59EJ3;B4DI39;B4DNT8;B4DWK5;B4E388;B4E1S9;B4DVU9;V9GZ37;B3KTT5;B4DNX1;B4E1T6	P0DMV8	629	641	HSPA1A;HSPA1B;HEL-S-103	Heat shock 70 kDa protein 1A;Heat shock 70 kDa protein 1B	yes	no	2	0.0026899	99.802		1	0	0	1037	141	1053	2753;2754	2827;2828	2827			2	0	0
GHVDILAPTVQELAALEK	18	0	1903.04	A0A7I2V430;A0A7I2V4F0;A3RJH1;Q92499;A0A087WZ71;F1T0B3;A0A7I2V2M5;A0A087X2G1;A0A7I2YQ77	A0A7I2V430	660	677	DDX1	ATP-dependent RNA helicase DDX1	yes	no	3	3.593e-24	166.92		1	0	0	1051	232	1067	2788;2789;2790	2866;2867;2868	2866			3	0	0
GHVSHGHGR	9	0	942.453	Q9BQQ5;E9PLL6;Q6NZ52;P46776;E9PLX7;E9PKT2;H0YF34;B4DRW5	Q9BQQ5	13	21	L27a;RPL27A	60S ribosomal protein L27a	yes	no	2	1.6059e-06	199.07		1	0	0	1052	465	1068	2791;2792;2793;2794	2869;2870;2871;2872	2871			4	0	0
GIDPFSLDALSK	12	0	1261.66	Q59ET3;B2R9K8;A0A024RDL1;P40227;A1JUI8;B4DPJ8;B4DN39	Q59ET3	294	305	CCT6A	T-complex protein 1 subunit zeta	yes	no	2	0.0064389	98.254		1	0	0	1055	97	1071	2799	2877	2877			1	0	0
GIVEESVTGVHR	12	0	1281.67	Q6ZMM9;Q2NKW8;H0Y8B3;Q6ZNS6;A0A024R0A8;V5YQL4;O43865;Q96HN2	Q6ZMM9	114	125	AHCYL1;AHCYL2;FGFR2-AHCYL1	Adenosylhomocysteinase;Putative adenosylhomocysteinase 2;Putative adenosylhomocysteinase 3	yes	no	3	0.0016649	89.403		1	0	0	1063	12	1079	2819	2897	2897			1	0	0
GLAPDLPEDLYHLIK	15	0	1692.91	P62277;J3KMX5	P62277	79	93	RPS13	40S ribosomal protein S13	yes	no	3	0.004489	65.092		1	0	0	1076	573	1092	2847;2848	2925;2926	2926			2	0	0
GLDVDSLVIEHIQVNK	16	0	1777.96	A0A087WXM6;J3QQT2;J3KRX5;A0A024R261;A0A0A6YYL6;P18621;J3KRB3;A0A087WWH0;J3QS96;J3QLC8;A0A0A0MRF8;A4D1R6;A4D1R5	A0A087WXM6	106	121	RPL17;hCG_24487;RPL17-C18orf32;LOC402695;LOC202789	60S ribosomal protein L17	yes	no	3	3.2022e-07	107.11		1	0	0	1080	31	1096	2855;2856;2857	2933;2934;2935	2934			3	0	0
GLQDVLR	7	0	799.455	Q59ET3;B2R9K8;A0A024RDL1;P40227;Q92526	Q59ET3	27	33	CCT6A;CCT6B	T-complex protein 1 subunit zeta;T-complex protein 1 subunit zeta-2	yes	no	2	0.014833	138.38		1	0	0	1092	97	1109	2894	2972	2972			1	0	0
GLSEDTTEETLKESFDGSVR	20	1	2199.02	A0A7I2V5M5;A0A7I2V428;C9JLB1;A0A7I2V3F3;H7BY16;P19338;B3KM80;Q6ZS99;A0A7I2V2U7;B3KTP9;A0A7I2V699;Q9BQ02	A0A7I2V5M5	578	597	NCL	Nucleolin	yes	no	3	1.8479e-18	128.14		1	0	0	1096	231	1113	2900;2901	2978;2979	2979			2	0	0
GLSQSALPYRR	11	1	1246.68	P62277;J3KMX5;E9PS50	P62277	10	20	RPS13	40S ribosomal protein S13	yes	no	2	0.00091752	147.2		1	0	0	1099	573	1116	2906;2907;2908	2984;2985;2986	2986			3	0	0
GLTPSQIGVILR	12	0	1252.75	P62277;J3KMX5	P62277	44	55	RPS13	40S ribosomal protein S13	yes	no	2	4.0561e-09	172.23		1	0	0	1102	573	1119	2916;2917;2918;2919;2920	2994;2995;2996;2997;2998	2996			5	0	0
GLVLDHGAR	9	0	936.514	Q59ET3;B2R9K8;A0A024RDL1;P40227;A1JUI8;B4DPJ8;B4DN39	Q59ET3	207	215	CCT6A	T-complex protein 1 subunit zeta	yes	no	2	0.0059432	132.09		1	0	0	1104	97	1121	2922	3000	3000			1	0	0
GLVLSGVLHK	10	0	1021.63	Q5K634;P29508	Q5K634	322	331	SERPINB3	Serpin B3	yes	no	2	0.012534	96.253		1	0	0	1105	540	1122	2923;2924;2925	3001;3002;3003	3001			3	0	0
GNFGGSFAGSFGGAGGHAPGVAR	23	0	2033.95	A0A087X0X3;P52272;Q59ES8;Q7KYM9;Q6P2D7;M0R2I7;M0QY96	A0A087X0X3	628	650	HNRNPM;ORF;HNRPM	Heterogeneous nuclear ribonucleoprotein M	yes	no	3	2.9425e-27	135.38		1	0	0	1110	113	1127	2931;2932;2933;2934	3009;3010;3011;3012	3011			4	0	0
GNFNYIEFTR	10	0	1259.59	J3QRS3;P19105;O14950;Q53HL1	J3QRS3	157	166	MYL12A;MYL12B	Myosin regulatory light chain 12A;Myosin regulatory light chain 12B	yes	no	2	0.0058571	113.71		1	0	0	1111	496	1128	2935;2936	3013;3014	3014			2	0	0
GPAVGIDLGTTYSCVGVFQHGK	22	0	2262.11	P11142;E9PKE3;V9HW22;Q53GZ6;B3KTV0;Q53HF2;E9PNE6;B4DTX2;E9PLF4;E9PK54;E9PQK7;E9PQQ4;E9PPY6;E9PN25;E9PI65	P11142	4	25	HSPA8;HEL-S-72p	Heat shock cognate 71 kDa protein	yes	no	3	0.0012491	65.25		1	0	0	1118	464	1135	2956	3034	3034			1	0	0
GPHHLDNSSPGPGSEAR	17	0	1713.78	A0A024QZC0;A0A024QZB7;A0A024QZ91;Q8WWM7;H3BUF6	Q8WWM7	383	399	ATXN2L	Ataxin-2-like protein	no	no	2	3.4908e-05	90.614		1	0	0	1123	649;3	1140	2971	3049	3049			1	0	0
GPNKHTLTQIK	11	1	1235.7	Q59ET3;B2R9K8;A0A024RDL1;P40227;A1JUI8;B4DPJ8;B4DN39	Q59ET3	376	386	CCT6A	T-complex protein 1 subunit zeta	yes	no	3	0.018971	55.806		1	0	0	1130	97	1147	2985	3063	3063			1	0	0
GPSSVEDIK	9	0	930.466	P06748;A0A7I2YQC0;A0A0S2Z491;A4ZU86;A0A0S2Z4G7;A0A7I2V5S2;A0A140VJQ2;Q9BTI9;E5RI98;A0A7I2V5J8;A0A024R3V9	P06748	240	248	NPM1;hCG_37498	Nucleophosmin	no	no	2	0.012868	136.8		1	0	36650000	1135	146	1152	2993;2994;2995	3071;3072;3073;3074;3075;3076	3076			6	0	54606000
GRPAVCQPQGR	11	1	1224.61	Q5T749	Q5T749	167	177	KPRP	Keratinocyte proline-rich protein	yes	yes	2;3	0.0027733	144.09		1	0	0	1154	623	1172	3033;3034;3035;3036	3115;3116;3117;3118	3116			4	0	0
GSEAMAAGLCAGQCILK	17	0	1735.81	H0YDZ4;A0A2X0SFH1;Q8TCU6	H0YDZ4	59	75	PREX1	Phosphatidylinositol 3,4,5-trisphosphate-dependent Rac exchanger 1 protein	yes	no	2	0.020057	57.532		1	0	0	1160	185	1178	3056	3142	3142		136	1	0	0
GSPGVPSFAAGPPISEGK	18	0	1653.84	Q0EFA5;A8K9C1;A0A1U9X8Y9;A0A1U9X8X8;A0A1U9X8X5;Q2L6G8;M1SWB8;G8JLG2;D2IYL2;A0A1U9X901;A0A1U9X8Z0;A0A1U9X8X6;Q15517	Q0EFA5	315	332	S;CDSN	Corneodesmosin	yes	no	2	1.468e-09	98.531		1	0	0	1168	169	1186	3076;3077;3078	3167;3168;3169	3168			3	0	0
GTGASGSFK	9	0	810.387	Q4VB24;A3R0T8;P10412;B2R984;A3R0T7;Q02539;A1L407;P22492;P16401;P16402;P16403	P16403	98	106	HIST1H1E;HIST1H1A;HIST1H1T;HIST1H1B;HIST1H1D;HIST1H1C	Histone H1.4;Histone H1.1;Histone H1t;Histone H1.5;Histone H1.3;Histone H1.2	no	no	2	0.014769	117.4		1	0	0	1175	528;255;527	1193	3091	3182	3182			1	0	0
GTVVTGTLER	10	0	1031.56	P49411;A0A384ME17	P49411	272	281	TUFM	Elongation factor Tu, mitochondrial	yes	no	2	0.00051936	138.26		1	0	0	1182	186	1200	3101;3102;3103;3104	3192;3193;3194;3195	3192			4	0	0
GVEICIATPGR	11	0	1171.6	P17844;J3KTA4;B5BUE6;B4DN41;B4DNG2;A0A7I2V2S0;A0A7I2V507;Q7Z2V5;Q59E92;A0A0G2JLI4;A0A7I2V5F5;J3KRZ1;J3QSF1;A0A1X7SBZ2;A0A5H1ZRQ2;Q59F66;Q92841;B4DZQ7	P17844	217	227	DDX5;DKFZp686J01190;DDX17	Probable ATP-dependent RNA helicase DDX5;Probable ATP-dependent RNA helicase DDX17	no	no	2	0.00014338	155.84		1	0	0	1184	529;174	1202	3107;3108;3109;3110;3111	3198;3199;3200;3201;3202	3200			5	0	0
GVVDSEDLPLNISR	14	0	1512.78	B4DMA2;P08238;B4DGL0;A0A024RD80;A8K3W9;Q9H6X9;Q2VPJ6;Q8TBA7;K9JA46;P07900;Q86U12;Q96HX7;O75322	B4DMA2	341	354	HSP90AB1;HSP90AA1;EL52	Heat shock protein HSP 90-beta;Heat shock protein HSP 90-alpha	no	no	2	1.6006e-22	181.68		1	0	0	1194	92;504	1212	3132;3133;3134;3135	3227;3228;3229;3230	3228			4	0	0
GYSFTTTAER	10	0	1131.52	P63261;I3L4N8;B4DVQ0;B4E335;P60709;Q8WVW5;Q53G76;Q53G99;Q53GK6;Q1KLZ0;B4E3A4;B4DW52;E7EVS6;A0A2R8Y793;I3L1U9;A0A6Q8PFE4;I3L3I0;B3KWQ3;B7ZAP6;Q6PJ43;V9HVZ7;A0A2R8YEA7	P63261	197	206	ACTG1;ACTB;PS1TP5BP1;HEL-176	Actin, cytoplasmic 2;Actin, cytoplasmic 2, N-terminally processed;Actin, cytoplasmic 1;Actin, cytoplasmic 1, N-terminally processed	yes	no	2	0.0001949	157.68		1	0	0	1197	357	1215	3139;3140;3141;3142	3234;3235;3236;3237	3236			4	0	0
HAEQERDELADEITNSASGK	20	1	2199	P35580	P35580	1705	1724	MYH10	Myosin-10	yes	yes	3	1.9465e-08	91.414		1	0	0	1201	547	1219	3151	3246	3246			1	0	0
HESGASIK	8	0	827.414	B4DUQ1;A0A024R228;P61978;Q5EC54;B4DFF1;B3KU16;S4R359	B4DUQ1	391	398	HNRPK;HNRNPK	Heterogeneous nuclear ribonucleoprotein K	yes	no	2	0.0038177	172.15		1	0	0	1209	30	1227	3167;3168;3169;3170	3262;3263;3264;3265	3263			4	0	0
HFNAPSHIR	9	0	1077.55	Q6IBH6;P61254;A0A024RBF6;J3QRI7;J3QQQ9;J3QQV1;J3KSS0;J3QRC4	Q6IBH6	18	26	RPL26;hCG_26523	60S ribosomal protein L26	yes	no	2;3	0.0001975	148.52		1	0	0	1212	568	1230	3173;3174;3175;3176	3268;3269;3270;3271	3269			4	0	0
HIDFSLR	7	0	886.466	A0A024R4M0;P46781;A5D904	A0A024R4M0	156	162	RPS9	40S ribosomal protein S9	yes	no	2	2.0014e-10	221.36		1	0	0	1234	43	1252	3244;3245;3246;3247	3340;3341;3342;3343	3340			4	0	0
HLTGEFEKK	9	1	1087.57	B5MDF5;P62826;J3KQE5;H0YFC6;F5H018	B5MDF5	30	38	RAN	GTP-binding nuclear protein Ran	yes	no	3	0.0084111	97.635		1	0	0	1250	376	1269	3303;3304;3305;3306	3399;3400;3401;3402	3401			4	0	0
HQGVMVGMGQK	11	0	1170.56	P63261;I3L4N8;B4DVQ0;B4E335;P60709;Q8WVW5;Q53G76;Q53G99;Q53GK6;Q1KLZ0;B4E3A4;E7EVS6;P63267;P68133;P68032;B7Z6P1;B3KUD3;P62736;D2JYH4;A0A2R8Y793;A6NL76;I3L1U9;A8K3K1;I3L3I0;Q7Z7J6;B3KW67;A0A6Q8PH58;A1E282;I3L3R2;G5E9R0;K7EM38;Q13707;J3KT65;A0A2R8YGF8;F6UVQ4;B7Z6I1;F8WB63;C9JZR7;C9JUM1;F6QUT6;B8ZZJ2;C9JTX5;C9JFL5;Q562R1	P63261	40	50	ACTG1;ACTB;PS1TP5BP1;ACTG2;ACTA1;ACTC1;ACTA2;ACTBL2	Actin, cytoplasmic 2;Actin, cytoplasmic 2, N-terminally processed;Actin, cytoplasmic 1;Actin, cytoplasmic 1, N-terminally processed;Actin, gamma-enteric smooth muscle;Actin, alpha skeletal muscle;Actin, alpha cardiac muscle 1;Actin, aortic smooth muscle;Beta-actin-like protein 2	yes	no	2	0.0015814	116.05		1	0	0	1264	357	1283	3351;3352	3450;3451	3450		214;215	2	0	0
HTLQQHQETPK	11	0	1345.67	Q7Z417	Q7Z417	79	89	NUFIP2	Nuclear fragile X mental retardation-interacting protein 2	yes	yes	2	0.00068751	136.5		1	0	0	1277	638	1296	3412;3413	3511;3512	3512			2	0	0
HTLTQIK	7	0	839.486	Q59ET3;B2R9K8;A0A024RDL1;P40227;A1JUI8;B4DPJ8;B4DN39	Q59ET3	380	386	CCT6A	T-complex protein 1 subunit zeta	yes	no	2	0.0051988	151.29		1	0	0	1279	97	1298	3415	3514	3514			1	0	0
IACLDFSLQK	10	0	1193.61	P17987;F5H282;E7EQR6;E7ERF2;F5GZ03	P17987	234	243	TCP1	T-complex protein 1 subunit alpha	yes	no	2	0.0053468	109.71		1	0	0	1286	530	1305	3429	3528	3528			1	0	0
IAGQVAAANKK	11	1	1069.62	B0ZBD0;P39019;Q8WVX7;A0A075B6E2	B0ZBD0	134	144	RPS19	40S ribosomal protein S19	yes	no	2	2.4783e-13	190.52		1	0	0	1296	300	1315	3448;3449;3450;3451	3548;3549;3550;3551	3551			4	0	0
IAPRPASGPIRPIVR	15	2	1598.97	Q6NZ55;A8K4C8;P26373;J3QSB4	Q6NZ55	46	60	RPL13	60S ribosomal protein L13	yes	no	3	0.0038809	69.878		1	0	0	1306	270	1325	3474;3475;3476	3580;3581;3582	3582			3	0	0
IAQLEEELEEEQGNTELINDR	21	0	2471.17	A0A024R1N1;P35579;Q6ZNL4	A0A024R1N1	1731	1751	MYH9;FLJ00279	Myosin-9	no	no	3	5.8425e-05	77.847		1	0	0	1308	22	1327	3478	3584	3584			1	0	0
IATANMLGIR	10	0	1058.59	Q9NX20	Q9NX20	218	227	MRPL16	39S ribosomal protein L16, mitochondrial	yes	yes	2	0.016077	85.161		1	0	0	1310	676	1329	3484;3485	3590;3591	3591		360	2	0	0
ICDDELILIK	10	0	1230.65	P17987;F5H282;E7EQR6;E7ERF2;F5GZ03	P17987	356	365	TCP1	T-complex protein 1 subunit alpha	yes	no	2	0.0023519	128.38		1	0	0	1312	530	1331	3487	3593	3593			1	0	0
IDASKNEEDEGHSNSSPR	18	1	1970.86	A0A024RDF4;A1LU37;Q14103;D6RAF8;D6RD83	A0A024RDF4	68	85	HNRPD;HNRNPD	Heterogeneous nuclear ribonucleoprotein D0	yes	no	2;3	4.3057e-81	227.4		1	0	0	1316	96	1335	3497;3498;3499	3603;3604;3605	3603			3	0	0
IDDVVNTR	8	0	930.477	B7Z9L0;B7Z2Z8;A8K3C3;P50991;B7Z2F4	B7Z9L0	476	483	CCT4	T-complex protein 1 subunit delta	yes	no	2	0.0041904	159.04		1	0	0	1318	266	1337	3503	3609	3609			1	0	0
IEEVPELPLVVEDK	14	0	1607.87	Q59GY2;P36578;H3BM89;Q53G74;B4DMJ2;B4DFI6	Q59GY2	158	171	RPL4	60S ribosomal protein L4	yes	no	2	0.00091502	92.925		1	0	0	1331	548	1350	3541;3542;3543	3647;3648;3649	3649			3	0	0
IEKEQSK	7	1	860.46	P07910;G3V4W0;G3V2Q1;B2R603;A8K9A4;G3V4C1;B2R5W2;B4DY08;G3V576;B3KX96;D3DPI2;A0A0G2JNQ3;B4DQQ2;B2RXH8;O60812;G3V5V7;G3V2D6	P07910	217	223	HNRNPC;hCG_1641229;HNRNPCL2;HNRNPCL1	Heterogeneous nuclear ribonucleoproteins C1/C2;Heterogeneous nuclear ribonucleoprotein C-like 2;Heterogeneous nuclear ribonucleoprotein C-like 1	yes	no	2	0.0036443	158.12		1	0	0	1338	290	1357	3562;3563;3564	3668;3669;3670	3669			3	0	0
IEVIEIMTDR	10	0	1217.63	P09651;A0A024RB53;A0A024RAZ7;A0A7I2V3R8;Q6IPF2;F8W6I7;A0A7I2V3W0;A0A024RC46;A0A7I2V2L6;Q0VAC0;A0A024QZ98;Q32P51;F8VTQ5;F8VZ49;A0A7I2YQX9;Q9BSM5;A0A2R8Y4L2;H0YH80;A0A7I2V5U9	P09651	131	140	HNRNPA1;HNRPA1;hCG_2020860;RP11-78J21.1;HNRNPA1L2	Heterogeneous nuclear ribonucleoprotein A1;Heterogeneous nuclear ribonucleoprotein A1, N-terminally processed;Heterogeneous nuclear ribonucleoprotein A1-like 2	yes	no	2	0.0023324	111.61		1	0	0	1340	80	1359	3571;3572;3573	3677;3678;3679	3678		70	3	0	0
IEVLEEELR	9	0	1128.6	P15924;Q4LE79;B4E2A0;B4DKX6	P15924	1034	1042	DSP;DSP variant protein	Desmoplakin	yes	no	2	0.016147	114.89		1	0	0	1341	525	1360	3574;3575;3576;3577	3680;3681;3682;3683	3682			4	0	0
IFVGGLSPDTPEEK	14	0	1487.75	A0A024RDF4;A1LU37;Q14103;H0Y8G5;H0YA96;D6RAF8;B4E0W4;D6RF44;Q12771;B4DTC3;A0A024RDB4	A0A024RDF4	184	197	HNRPD;HNRNPD	Heterogeneous nuclear ribonucleoprotein D0	no	no	2	4.7383e-13	170.52		1	0	0	1353	96;94	1372	3600;3601;3602;3603	3706;3707;3708;3709	3708			4	0	0
IGLIQFCLSAPK	12	0	1345.74	B7Z9L0;B7Z2Z8;A8K3C3;P50991;B7Z2F4	B7Z9L0	190	201	CCT4	T-complex protein 1 subunit delta	yes	no	2	0.021446	81.338		1	0	0	1362	266	1381	3622	3728	3728			1	0	0
IGQGYLIK	8	0	890.523	P39023;B3KS36;Q8TBW1;Q96QL0;Q9NY85;G5E9G0;Q49AJ9;Q9BT63;B5MCW2	P39023	287	294	RPL3;rpl3	60S ribosomal protein L3	yes	no	2	0.011116	138.37		1	0	0	1365	550	1384	3630;3631;3632	3736;3737;3738	3738			3	0	0
IGSGVER	7	0	716.382	A0A087X0X3;P52272;Q59ES8;Q7KYM9;Q6P2D7;M0QZM1	A0A087X0X3	479	485	HNRNPM;ORF;HNRPM	Heterogeneous nuclear ribonucleoprotein M	yes	no	2	0.0053583	151.17		1	0	0	1369	113	1388	3643;3644;3645;3646	3749;3750;3751;3752	3752			4	0	0
IINEPTAAAIAYGLDKK	17	1	1786.98	P11142;E9PKE3;V9HW22;B3KTV0;Q96IS6;Q53HF2;B4E1Q1;A0A024R6B5;A0A384MDT7;P54652;B4DTX2;E9PI65;E9PN89	P11142	172	188	HSPA8;HEL-S-72p;HSPA2	Heat shock cognate 71 kDa protein;Heat shock-related 70 kDa protein 2	no	no	3	3.0872e-07	108.18		1	0	0	1388	464;466	1407	3694;3695;3696	3800;3801;3802	3800			3	0	0
IITEGFEAAK	10	0	1077.57	Q59ET3;B2R9K8;A0A024RDL1;P40227;A1JUI8;B4DPJ8	Q59ET3	116	125	CCT6A	T-complex protein 1 subunit zeta	yes	no	2	0.030496	87.476		1	0	0	1389	97	1408	3697	3803	3803			1	0	0
IITLTGPTNAIFK	13	0	1387.81	Q53SS8;Q15365	Q53SS8	58	70	PCBP1	Poly(rC)-binding protein 1	yes	no	2	0.00077464	130.98		1	0	0	1391	607	1410	3703;3704;3705;3706;3707	3809;3810;3811;3812;3813	3811			5	0	0
ILAEGGGAK	9	0	814.455	P49411;A0A384ME17	P49411	80	88	TUFM	Elongation factor Tu, mitochondrial	yes	no	2	0.028174	97.798		1	0	0	1404	186	1424	3740	3846	3846			1	0	0
ILIAKPIMFR	10	1	1200.74	A0A024RDB2;Q9UN86;A0A024RDE5;A8K6V7;A0A7I2YQD9;A0A7I2V647;A0A7I2V3P9	A0A024RDB2	355	364	G3BP2	Ras GTPase-activating protein-binding protein 2	no	no	3	0.0016742	97.431		1	0	0	1418	93;237	1439;1440	3785;3786;3787;3788;3789;3790	3892;3893;3894;3895;3896;3897	3897		72	6	0	0
ILLSSGR	7	0	744.449	F8VQ14;F5GWF6;V9HW96;P78371;B7Z4R3	F8VQ14	51	57	CCT2;HEL-S-100n	T-complex protein 1 subunit beta	yes	no	2	0.013965	141.98		1	0	0	1427	469	1449	3826	3933	3933			1	0	0
INEAIVAVQAIIADPK	16	0	1663.95	Q549M8;Q9Y224;Q5RLJ0	Q549M8	219	234	C14orf166	UPF0568 protein C14orf166	yes	no	3	3.7008e-07	121.27		1	0	0	1445	616	1468	3865;3866;3867	3972;3973;3974	3972			3	0	0
INEILSNALKR	11	1	1269.74	A0A087X0X3;P52272;Q59ES8;Q7KYM9;M0R019;B4DEG4	A0A087X0X3	372	382	HNRNPM;ORF	Heterogeneous nuclear ribonucleoprotein M	yes	no	3	0.0011924	112.13		1	0	0	1447	113	1470	3870;3871;3872;3873;3874	3977;3978;3979;3980;3981	3980			5	0	0
INVELSTK	8	0	902.507	A0A0S2Z4Z0;Q96PK6;Q59GV2;A0A0S2Z567	A0A0S2Z4Z0	142	149	RBM14	RNA-binding protein 14	yes	no	2	0.005446	145.34		1	0	0	1451	149	1474	3886;3887	3993;3994	3993			2	0	0
IQKGDSK	7	1	774.424	B4DDX2;Q07666;B2R7B5;B4E043	B4DDX2	112	118	KHDRBS1	KH domain-containing, RNA-binding, signal transduction-associated protein 1	yes	no	2	0.022724	130.77		1	0	0	1464	342	1488	3918	4025	4025			1	0	0
IQKGDSKK	8	2	902.519	B4DDX2;Q07666;B2R7B5;B4E043	B4DDX2	112	119	KHDRBS1	KH domain-containing, RNA-binding, signal transduction-associated protein 1	yes	no	2	0.0348	101.64		1	0	5017300	1465	342	1489	3919	4026	4026			1	0	7475400
IQNGAQGIR	9	0	955.52	P31943;A0A384MEJ3;G8JLB6;E9PCY7;D6RIU0;D6RBM0;D6RIH9;D6RJ04;D6RDU3;E7EN40;D6RIT2;D6RFM3;D6R9T0;D6RAM1;E7EQJ0;D6RDL0;D6RF17	P31943	36	44	HNRNPH1	Heterogeneous nuclear ribonucleoprotein H;Heterogeneous nuclear ribonucleoprotein H, N-terminally processed	yes	no	2	0.0015445	157.9		1	0	0	1467	189	1491	3921;3922;3923;3924;3925	4028;4029;4030;4031;4032	4032			5	0	0
ISGLIYEETR	10	0	1179.61	B2R4R0;P62805;Q0VAS5;Q6B823	B2R4R0	47	56	HIST1H4H;HIST1H4A	Histone H4	yes	no	2	1.1702e-10	201.58		1	0	0	1483	308	1507	3976;3977	4083;4084	4083			2	0	0
ISLGLPVGAVINCADNTGAK	20	0	1969.03	Q9BTQ7;A0A024R1Q8;P62829;C9JD32;J3KT29;B9ZVP7	Q9BTQ7	10	29	RPL23	60S ribosomal protein L23	yes	no	3	0.0068622	51.487		1	0	0	1488	24	1512	3992	4107	4107			1	0	0
ITDVIIGFQACCR	13	0	1551.75	A0A024R1N1;P35579;Q86XU5;B4E3S1	A0A024R1N1	779	791	MYH9	Myosin-9	no	no	2;3	2.1362e-09	166.07		1	0	0	1500	22	1524	4024;4025;4026;4027	4141;4142;4143;4144	4144			4	0	0
ITNLTQQLEQASIVK	15	0	1684.94	P15924	P15924	1612	1626	DSP	Desmoplakin	yes	yes	2	5.4081e-13	168.82		1	0	0	1505	525	1529	4036;4037	4153;4154	4154			2	0	0
IVEVLLMK	8	0	943.578	H0Y6E7;H3BT71;P38159;H3BR27;A8K8A6;O75526	H0Y6E7	36	43	RBMX;RBMXL2	RNA-binding motif protein, X chromosome;RNA-binding motif protein, X chromosome, N-terminally processed;RNA-binding motif protein, X-linked-like-2	yes	no	2	0.026363	102.71		1	0	0	1516	479	1541	4084;4085	4201;4202	4202		266	2	0	0
KALPASETPK	10	1	1040.59	Q32Q62;O76021;J3QSV6;A0PJ61	Q32Q62	408	417	RSL1D1	Ribosomal L1 domain-containing protein 1	yes	no	2	0.0034652	110.53		1	0	0	1541	513	1566	4143;4144;4145	4261;4262;4263	4262			3	0	0
KDLLEVPK	8	1	940.559	B3KX20;B4E3F8;B4E3S9;B4DIX9;P29536	B3KX20	384	391	LMOD1	Leiomodin-1	yes	no	3	0.019675	74.127		1	0	0	1556	336	1583	4207	4325	4325	72		1	0	0
KDLQNFLK	8	1	1004.57	B2R4M6;P06702	B2R4M6	43	50	S100A9	Protein S100;Protein S100-A9	yes	no	2	0.0045306	171.09		1	0	0	1557	306	1584	4208;4209;4210;4211	4326;4327;4328;4329	4329			4	0	0
KEEELQAALAR	11	1	1256.67	A0A024R1N1;P35579;Q86XU5;Q99529;Q7Z406;A0A0C4DFM8	A0A024R1N1	1081	1091	MYH9;MYH14	Myosin-9;Myosin-14	no	no	2	3.0622e-27	217.66		1	0	0	1569	22;637	1596	4228;4229;4230;4231;4232	4346;4347;4348;4349;4350	4347			5	0	0
KEEELQGALAR	11	1	1242.66	P35580	P35580	1088	1098	MYH10	Myosin-10	yes	yes	2	5.5946e-177	275.28		1	0	0	1570	547	1597	4233;4234;4235;4236;4237	4351;4352;4353;4354;4355;4356	4355			6	0	0
KEMEQLVLDK	10	1	1231.65	B4DHY7;B4E1C9;Q53GS5;B2RBI2;Q96A49	B4DHY7	126	135	SYAP1	Synapse-associated protein 1	yes	no	2	0.016383	99.802		1	0	0	1577	315	1605	4269	4389	4389	67	201	1	0	0
KGQGGAGAGDDEEED	15	1	1433.55	A0A024R4M0;P46781	A0A024R4M0	180	194	RPS9	40S ribosomal protein S9	yes	no	2	0.00028386	91.855		1	0	0	1606	43	1639	4362;4363	4482;4483	4482			2	0	0
KIALEDVPEK	10	1	1140.64	A8K946;O43148;Q05D80;Q05DQ2	A8K946	128	137	RNMT	mRNA cap guanine-N7 methyltransferase	yes	no	2	0.018747	88.496		1	0	0	1616	287	1649	4394	4514	4514			1	0	0
KIQEILTQVK	10	1	1198.73	O00425	O00425	552	561	IGF2BP3	Insulin-like growth factor 2 mRNA-binding protein 3	yes	yes	2	1.3473e-10	198.72		1	0	0	1624	506	1658	4412;4413;4414;4415;4416	4533;4534;4535;4536;4537	4536			5	0	0
KKVEAQLQELQVK	13	2	1539.9	A0A024R1N1;P35579;Q86XU5	A0A024R1N1	1248	1260	MYH9	Myosin-9	no	no	3	0.00049859	102.87		1	0	0	1633	22	1667	4436;4437;4438	4557;4558;4559	4559			3	0	0
KLAVNMVPFPR	11	1	1270.72	P07437;B4DY90;Q5SU16;A0A384NYT8;Q5JP53;B7ZAF0;Q1KSF8;Q6LC01;Q5ST81;B4E052;Q9BUU9;B4DQN9;B4DMU8;B4DXZ5;Q96B85;P68371;Q8IZ29;Q8N6N5;Q8IWP6;B3KML9;Q96HX0;P04350;B4DJ43;Q3ZCM7;B4DE77;B4DFH6;A0A183YE00	P68371	252	262	TUBB;XTP3TPATP1;TUBB4B;TUBB2C;TUBB4A;TUBB8	Tubulin beta chain;Tubulin beta-4B chain;Tubulin beta-4A chain;Tubulin beta-8 chain	no	no	3	0.0067846	66.595		1	0	0	1636	587;200	1670	4441	4563	4563		143	1	0	0
KLDPEIVPEEK	11	1	1295.7	A8K946;O43148;Q05D80;Q05DQ2;K7EPP5	A8K946	83	93	RNMT	mRNA cap guanine-N7 methyltransferase	yes	no	2	0.0011782	148.28		1	0	0	1638	287	1672	4445;4446;4447	4567;4568;4569	4568			3	0	0
KLDPGSEETQTLVR	14	1	1571.82	B4DUP0;Q53YD7;P26641	B4DUP0	170	183	EEF1G	Elongation factor 1-gamma	yes	no	2	0.0064326	76.655		1	0	0	1640	356	1674	4453	4575	4575			1	0	0
KLTPQGQR	8	1	926.53	B0ZBD0;P39019;Q8WVX7;A0A075B6E2	B0ZBD0	122	129	RPS19	40S ribosomal protein S19	yes	no	2	0.0026317	185.22		1	0	0	1656	300	1690	4488;4489;4490;4491	4610;4611;4612;4613	4613			4	0	0
KQLSSQGTVR	10	1	1102.61	A0A7I2YQI0;C9J494;A0A7I2V5D2;Q9H000	A0A7I2YQI0	356	365	MKRN2	Probable E3 ubiquitin-protein ligase makorin-2	yes	no	2	0.0015813	128.36		1	0	0	1692	235	1728	4577;4578;4579	4700;4701;4702	4701			3	0	0
KQTGQVYAMK	10	1	1152.6	B4DM55	B4DM55	2	11			yes	yes	2	0.014137	52.403		1	0	0	1700	352	1736	4606;4607;4608;4609	4729;4730;4731;4732	4731	78	212	4	0	0
KVEAQLQELQVK	12	1	1411.8	A0A024R1N1;P35579;Q86XU5	A0A024R1N1	1249	1260	MYH9	Myosin-9	no	no	2;3	4.351e-110	255.3		1	0	0	1737	22	1777	4705;4706;4707;4708;4709;4710	4829;4830;4831;4832;4833;4834	4833			6	0	0
KVGLIAAR	8	1	826.539	P62917;E9PP36;B4DVG7;E9PKU4	P62917	234	241	RPL8	60S ribosomal protein L8	yes	no	2	0.0038943	144.9		1	0	0	1745	585	1785	4735;4736;4737;4738;4739	4859;4860;4861;4862;4863	4861			5	0	0
LASLEELKR	9	1	1057.61	P15924;Q4LE79;B4E2A0;B4DKX6	P15924	1076	1084	DSP;DSP variant protein	Desmoplakin	yes	no	2;3	0.0010728	174.27		1	0	0	1793	525	1835	4878;4879;4880;4881;4882;4883;4884	5002;5003;5004;5005;5006;5007;5008	5007			7	0	0
LASLGLK	7	0	700.448	Q96HS1	Q96HS1	135	141	PGAM5	Serine/threonine-protein phosphatase PGAM5, mitochondrial	yes	yes	2	0.01757	132.72		1	0	0	1794	657	1836	4885;4886;4887	5009;5010;5011	5009			3	0	0
LATNAAVTVLR	11	0	1127.67	Q7Z759;Q53HU0;P50990;H7C2U0	Q7Z759	459	469	CCT8	T-complex protein 1 subunit theta	yes	no	2	0.00011902	107.08		1	0	22764000	1800	563	1842	4901	5025;5026	5026			2	0	33917000
LFDMSGVR	8	0	923.453	A0A3B3IT47;Q9Y2I8	A0A3B3IT47	516	523	WDR37	WD repeat-containing protein 37	yes	no	2	0.030227	95.352		1	0	0	1851	203	1893	5011	5139	5139		148	1	0	0
LFEGNALLRR	10	1	1187.68	A0A024R4M0;P46781;B5MCT8;C9JM19;B7Z732;A5D904	A0A024R4M0	71	80	RPS9	40S ribosomal protein S9	yes	no	3	0.0003939	147.51		1	0	0	1853	43	1895	5019;5020;5021;5022	5147;5148;5149;5150	5150			4	0	0
LFIGGLNTETNEK	13	0	1434.74	H0Y6E7;H3BT71;P38159;Q2VIN3;Q96E39;H3BR27;A0A1B0GUK8;H3BNC1	H0Y6E7	12	24	RBMX;RBMXL1	RNA-binding motif protein, X chromosome;RNA-binding motif protein, X chromosome, N-terminally processed;RNA binding motif protein, X-linked-like-1	yes	no	2	9.623e-29	210.64		1	0	0	1854	479	1896	5023;5024;5025;5026;5027	5151;5152;5153;5154;5155	5154			5	0	0
LFIGGLSFETTEESLR	16	0	1797.91	A0A7I2V4I6;P22626;A0A7I2V4S4;A0A7I2V4N1;A0A7I2V3P1;A0A7I2V3P7;A0A7I2V323;A0A384NL58;A0A087WUI2;I6L957;A0A7I2V4N0;A0A7I2YQN4	A0A7I2V4I6	23	38	HNRNPA2B1	Heterogeneous nuclear ribonucleoproteins A2/B1	yes	no	2	3.1313e-09	142.08		1	0	0	1858	233	1900	5036	5164	5164			1	0	0
LFPDTPLALDANK	13	0	1413.75	Q12906;A0A024R7C7;F4ZW66;F4ZW65;A8K590;F4ZW64;B4DFG4;B4DDF3	Q12906	588	600	ILF3	Interleukin enhancer-binding factor 3	yes	no	2	0.0012394	127.42		1	0	0	1861	57	1904	5044;5045;5046	5172;5173;5174	5174			3	0	0
LFVGNLPADITEDEFKR	17	1	1963.01	Q9BSV4;Q86VG2;A0A384N5Z8;P23246;Q6PIX2	Q9BSV4	226	242	SFPQ	Splicing factor, proline- and glutamine-rich	yes	no	3	2.3733e-09	136.01		1	0	0	1868	193	1911	5070;5071;5072	5198;5199;5200	5199			3	0	0
LFVTNDAATILR	12	0	1332.74	Q7Z759;Q53HU0;P50990;H7C4C8	Q7Z759	12	23	CCT8	T-complex protein 1 subunit theta	yes	no	2	0.00092281	135.55		1	0	0	1869	563	1912	5073	5201	5201			1	0	0
LGAGGGSPEK	10	0	871.44	H3BS86;Q9UNE7	H3BS86	13	22	STUB1	E3 ubiquitin-protein ligase CHIP	yes	no	2	0.0062782	105.52		1	0	0	1870	485	1913	5074	5202	5202			1	0	0
LGASLSADKK	10	1	988.555	Q9Y2H9	Q9Y2H9	1270	1279	MAST1	Microtubule-associated serine/threonine-protein kinase 1	yes	yes	2	0.0034986	110.31		1	0	0	1871	685	1914	5075	5203	5203			1	0	0
LGIHEDSQNR	10	0	1167.56	Q2VPJ6;Q8TBA7;K9JA46;P07900;Q86U12;Q96HX7;O75322	Q2VPJ6	447	456	HSP90AA1;EL52	Heat shock protein HSP 90-alpha	yes	no	3	0.017226	59.908		1	0	0	1881	504	1924	5109;5110	5238;5239	5239			2	0	0
LGNDFHTNKR	10	1	1200.6	H3BNC9;P08708;H0YN88;A0A075B716;H0YN73;A0A0J9YYC4	H3BNC9	473	482	RPS17	40S ribosomal protein S17	yes	no	2;3	1.5546e-10	197.66		1	0	0	1888	483	1931	5122;5123;5124;5125;5126;5127;5128	5251;5252;5253;5254;5255;5256;5257	5251			7	0	0
LIFAGKQLEDGR	12	1	1345.74	P62987;L8B196;F5H747;F5GXK7;J3QKN0;Q5U5U6;Q5PY61;Q9UFQ0;Q96C32;Q96MH4;A0A2R8Y422;A0A248RGE3;Q96H31;L8B4R0;A8K674;L8B4M0;L8B4Z6;L8B4J3;Q66K58;B2RDW1;L8B4I8;Q59EM9;J3QS39;Q3MIH3;P0CG47;P0CG48;P62979;F5H6Q2;F5H388;Q5UGI3;B4DV12;M0R1M6;J3QTR3;F5H265;M0R2S1;F5H2Z3;F5GYU3;Q5RKT7;M0R1V7;Q49A90;Q8WYN9;F5GZ39	P62987	43	54	UBA52;UbC;UBC;UBB;DKFZp434K0435;HEL112;RPS27A	Ubiquitin-60S ribosomal protein L40;Ubiquitin;60S ribosomal protein L40;Polyubiquitin-B;Ubiquitin;Polyubiquitin-C;Ubiquitin;Ubiquitin-40S ribosomal protein S27a;Ubiquitin;40S ribosomal protein S27a	yes	no	3	0.00082212	106.49		1	0	0	1914	175	1957	5204;5205;5206	5334;5335;5336	5334	36		3	0	0
LIVENLSSR	9	0	1029.58	Q59GY3;V9HVZ0;Q13247;A0A590UK80;A0A590UJK4;A0A590UK01;A0A590UJP7;A8K588;A8K644;Q59EF5;Q53F45;A0A0D9SEM4;B4DJK0;Q59EK7;B4DUA4;A0A024R6D8;B4DEM8;Q13243;Q08170	Q59GY3	146	154	HEL-S-91;SRSF6;SFRS4;SRSF4;SRSF5;SFRS5	Serine/arginine-rich splicing factor 6;Serine/arginine-rich splicing factor 5;Serine/arginine-rich splicing factor 4	yes	no	2	0.0014421	155.75		1	0	0	1922	212	1965	5227;5228;5229;5230	5357;5358;5359;5360	5359			4	0	0
LKEENFFGPKEEVK	14	2	1692.87	Q9NZI8;D3DTW3	Q9NZI8	474	487	IGF2BP1	Insulin-like growth factor 2 mRNA-binding protein 1	yes	no	3	0.00030425	91.076		1	0	0	1932	681	1975	5252;5253;5254;5255;5256	5382;5383;5384;5385;5386	5386			5	0	0
LKGSGNLEAIHIIKK	15	2	1619.97	F8VQ14;F5GWF6;V9HW96;P78371;B7Z4R3	F8VQ14	190	204	CCT2;HEL-S-100n	T-complex protein 1 subunit beta	yes	no	3	0.00014693	89.624		1	0	0	1939	469	1982	5276	5406	5406			1	0	0
LLDVVHPAAK	10	0	1061.62	Q6IBT3;Q53HV2;Q99832;F8WAM2	Q6IBT3	68	77	CCT7	T-complex protein 1 subunit eta	yes	no	2	0.0057302	113.26		1	0	0	1962	615	2007	5336	5467	5467			1	0	0
LLESLDQLELR	11	0	1327.73	B3KM36;B3KN59;O95816	B3KM36	28	38	BAG2	BAG family molecular chaperone regulator 2	yes	no	2	3.4988e-07	163.88		1	0	0	1974	324	2019	5371;5372	5504;5505	5504			2	0	0
LLETECPQYIR	11	0	1420.7	P05109	P05109	37	47	S100A8	Protein S100-A8;Protein S100-A8, N-terminally processed	yes	yes	2	1.4072e-05	161.92		1	0	0	1975	515	2020	5373;5374;5375	5506;5507;5508	5508			3	0	0
LLGGLAVR	8	0	797.512	Q53G83;P23396;E9PL09;F2Z2S8;H0YCJ7;H0YF32;Q9NQS8;A7E2S3	Q53G83	109	116	RPS3	40S ribosomal protein S3	yes	no	2	0.014763	134.12		1	0	0	1981	533	2026	5390;5391;5392;5393;5394	5523;5524;5525;5526;5527	5525			5	0	0
LLQDFFNGK	9	0	1080.56	P11142;E9PKE3;V9HW22;Q53GZ6;B3KTV0;Q96IS6;Q53HF2;E9PNE6;B4E1Q1;A8K7Q2;A0A024R6B5;A0A384MDT7;P54652;B3KUS2;E9PN89;Q53FC7;B3KSM6;B2R6X5;A0A384NKX5;P17066;B4DHP5	P11142	349	357	HSPA8;HEL-S-72p;HSPA2;HSPA6	Heat shock cognate 71 kDa protein;Heat shock-related 70 kDa protein 2;Heat shock 70 kDa protein 6	no	no	2	0.00042904	170.32		1	0	21047000	1999	464;466;198	2044	5446	5579;5580	5580			2	0	31358000
LLQDFFNGR	9	0	1108.57	P0DMV8;P0DMV9;A0A0G2JIW1;A8K5I0;A0A1U9X7W4;B4DFN9;Q59EJ3;B4DI39;B4DNT8;B4DWK5;B4E388;B4E1S9;B4DVU9;V9GZ37;B3KTT5;B4DNX1;B4E1T6	P0DMV8	349	357	HSPA1A;HSPA1B;HEL-S-103	Heat shock 70 kDa protein 1A;Heat shock 70 kDa protein 1B	yes	no	2	0.0013731	154.31		1	0	0	2000	141	2045	5447	5581	5581			1	0	0
LLQDSVDFSLADAINTEFK	19	0	2125.06	P08670;V9HWE1;B0YJC4;Q53HU8;B3KRK8;A0A1B0GTT5;A0A1B0GVG8	P08670	79	97	VIM;HEL113	Vimentin	yes	no	3	0.0031371	62.362		1	0	0	2001	518	2046	5448	5582	5582			1	0	0
LNARPGVGGVR	11	1	1094.63	F6VRR5;Q9BY77;Q96DI9;B4E0L0;F8WCX5;B4DSH9;Q6R954;F8WEE2;Q8WUT1;Q659C6	F6VRR5	21	31	POLDIP3;PDIP46;DKFZp434G0310	Polymerase delta-interacting protein 3	yes	no	2;3	0.00086158	133.58		1	0	0	2027	472	2072	5517;5518;5519;5520	5651;5652;5653;5654	5654			4	0	0
LNFGDDIPSALR	12	0	1316.67	H3BS86;Q9UNE7;H3BUD0	H3BS86	110	121	STUB1	E3 ubiquitin-protein ligase CHIP	yes	no	2	0.0061088	98.943		1	0	0	2035	485	2080	5541	5675	5675			1	0	0
LQDEIQNMKEEMAR	14	1	1733.81	P08670;V9HWE1;B0YJC4;Q53HU8;B3KRK8;B0YJC5	P08670	365	378	VIM;HEL113	Vimentin	yes	no	2;3	7.3246e-05	94.673		1	0	0	2065	518	2110	5605;5606;5607;5608	5747;5748;5749;5750	5747		283;284	4	0	0
LQEETGAKISVLGK	14	1	1471.82	B4DDX2;Q07666;B2R7B5;B4E043	B4DDX2	167	180	KHDRBS1	KH domain-containing, RNA-binding, signal transduction-associated protein 1	yes	no	2	3.2903e-27	196.24		1	0	0	2068	342	2113	5621;5622;5623;5624;5625	5763;5764;5765;5766;5767	5765	75;76		5	0	0
LQELEGAVK	9	0	985.544	P35580	P35580	1801	1809	MYH10	Myosin-10	yes	yes	2	0.0024686	141.39		1	0	0	2070	547	2115	5627;5628	5769;5770	5769			2	0	0
LQGEVVAFDYQSK	13	0	1482.74	Q3MHD2;K7ELG9;B4DUG4	Q3MHD2	25	37	LSM12	Protein LSM12 homolog	yes	no	2	0.0033112	96.64		1	0	0	2076	610	2121	5645;5646	5787;5788	5788			2	0	0
LQNELDNVSTLLEEAEKK	18	1	2072.06	P35580	P35580	1285	1302	MYH10	Myosin-10	yes	yes	3	4.0196e-70	214.54		1	0	0	2083	547	2128	5663;5664;5665	5811;5812;5813	5812			3	0	0
LQTQVFK	7	0	862.491	A0A024R4M0;P46781;B5MCT8;C9JM19;B7Z732;A5D904	A0A024R4M0	110	116	RPS9	40S ribosomal protein S9	yes	no	2	0.019172	129.96		1	0	0	2091	43	2136	5679	5827	5827			1	0	0
LQVIVCSATLHSFDVK	16	0	1815.96	A0A7I2V430;A0A7I2V4F0;A3RJH1;Q92499;A0A087WZ71;F1T0B3;A0A7I2V2M5;A0A087X2G1;A0A7I2YQ77;B4DP70;A0A7I2V4J3	A0A7I2V430	358	373	DDX1	ATP-dependent RNA helicase DDX1	yes	no	3	3.9904e-07	100.43		1	0	0	2094	232	2139	5682;5683;5684;5685;5686	5830;5831;5832;5833;5834	5832			5	0	0
LQVLHPFDPEQR	12	0	1477.77	A0A7I2YQI0;C9J494;A0A7I2V5D2;Q9H000;A0A7I2V422	A0A7I2YQI0	192	203	MKRN2	Probable E3 ubiquitin-protein ligase makorin-2	yes	no	3	0.0061435	72.29		1	0	0	2095	235	2140	5687;5688;5689;5690;5691	5835;5836;5837;5838;5839	5837			5	0	0
LSESQLSFRR	10	1	1221.65	A0A0S2Z4Z0;Q96PK6;B4DNG4	A0A0S2Z4Z0	617	626	RBM14	RNA-binding protein 14	yes	no	3	0.0017186	107.79		1	0	0	2110	149	2155	5756;5757;5758	5907;5908;5909	5907			3	0	0
LSKEDIER	8	1	988.519	P11142;E9PKE3;V9HW22;Q53GZ6;B3KTV0;Q96IS6;E9PNE6;B4E1Q1;A8K7Q2;E9PS65;Q96BE0;E9PM13;Q96H53	P11142	510	517	HSPA8;HEL-S-72p	Heat shock cognate 71 kDa protein	yes	no	2	0.0049007	182.39		1	0	0	2120	464	2165	5783;5784;5785;5786	5934;5935;5936;5937	5936			4	0	0
LSKEEIER	8	1	1002.53	P0DMV8;P0DMV9;A0A0G2JIW1;A8K5I0;A0A1U9X7W4;B4DFN9;B4DI39;B4DNT8;B4DWK5;B4E388;B4E1S9;B4DVU9;V9GZ37;B3KTT5;B4DNX1;B4E1T6;B4DXY3;Q53FA3;B2RCQ9;A0A1U9X7X9;A0A1U9X7X4;A0A1U9X7W7;B4DI54;P34931	P0DMV8	510	517	HSPA1A;HSPA1B;HEL-S-103;HSPA1L	Heat shock 70 kDa protein 1A;Heat shock 70 kDa protein 1B;Heat shock 70 kDa protein 1-like	no	no	2	4.2455e-16	198.07		1	0	123180000	2121	141;168	2166	5787;5788;5789	5938;5939;5940;5941	5938			4	0	183540000
LTAIDILTTCAADIQR	16	0	1773.93	A4FU77;O75643;B4E0P5;B4E150;Q9UNV9;A2RRQ7	A4FU77	1322	1337	SNRNP200	U5 small nuclear ribonucleoprotein 200 kDa helicase	yes	no	3	0.0015815	69.729		1	0	0	2140	257	2185	5826;5827;5828	5978;5979;5980	5980			3	0	0
LVNHFVEEFK	10	0	1260.65	P0DMV8;P0DMV9;A0A0G2JIW1;A8K5I0;A0A1U9X7W4;B4DFN9;Q59EJ3;B4DI39;B4DNT8;B4DWK5;B4E388;B4E1S9;B4DVU9;V9GZ37;B3KTT5;B4DNV4	P0DMV8	237	246	HSPA1A;HSPA1B;HEL-S-103	Heat shock 70 kDa protein 1A;Heat shock 70 kDa protein 1B	yes	no	2	0.00050352	147.75		1	0	58110000	2186	141	2231	5960	6115;6116	6115			2	0	86579000
LVNHFVEEFKR	11	1	1416.75	P0DMV8;P0DMV9;A0A0G2JIW1;A8K5I0;A0A1U9X7W4;B4DFN9;Q59EJ3;B4DI39;B4DNT8;B4DWK5;B4E388;B4E1S9;B4DVU9;V9GZ37;B3KTT5;B4DNV4	P0DMV8	237	247	HSPA1A;HSPA1B;HEL-S-103	Heat shock 70 kDa protein 1A;Heat shock 70 kDa protein 1B	yes	no	2;3	1.278e-07	155.26		1	0	0	2187	141	2232	5961;5962;5963;5964	6117;6118;6119;6120	6120			4	0	0
LVQEQGSHSK	10	0	1111.56	P35580	P35580	553	562	MYH10	Myosin-10	yes	yes	3	0.0068207	76.282		1	0	0	2191	547	2236	5971;5972	6127;6128	6128			2	0	0
LVVTSSR	7	0	760.444	A0A3B3IT47;Q9Y2I8	A0A3B3IT47	419	425	WDR37	WD repeat-containing protein 37	yes	no	2	0.02009	128.38		1	0	0	2206	203	2251	5995	6151	6151			1	0	0
MCLFAGFQR	9	0	1128.52	B4DLR3;A0A1W2PPS1;A0A1X7SBS1;A0A1W2PP35;Q7Z4Q5;A0A1W2PQL0;A0A1W2PP34;A0A1W2PPL4;A0A1W2PPH7;Q5RI18;A0A1W2PQ74;A0A1W2PRZ7;A0A1W2PQD4;Q00839;B3KX72;Q96BA7	B4DLR3	552	560	HNRPU;HNRNPU	Heterogeneous nuclear ribonucleoprotein U	no	no	2	0.00019363	170.17		1	0	0	2216	171;337	2261	6007;6008;6009;6010;6011	6163;6164;6165;6166;6167	6167		126	5	0	0
MDLNSEQAEQLER	13	0	1561.7	Q52LJ0	Q52LJ0	197	209	FAM98B	Protein FAM98B	yes	yes	2	1.6612e-99	263.3		1	0	0	2219	613	2264	6014;6015;6016;6017	6170;6171;6172;6173	6172		339	4	0	0
MEGPLSVFGDR	11	0	1206.57	P17987;E7ERF2;F5GZ03;F5GZI8;F5GYL4	P17987	1	11	TCP1	T-complex protein 1 subunit alpha	yes	no	2	0.00093573	100.48		1	0	0	2229	530	2274	6036	6192	6192		294	1	0	0
MGGEEAEIR	9	0	990.444	Q08211;B3KU66	Q08211	930	938	DHX9	ATP-dependent RNA helicase A	yes	no	2	0.0053319	121.85		1	0	0	2235	595	2280	6051;6052;6053;6054	6207;6208;6209;6210	6210		331	4	0	0
MGLAMGGGGGASFDR	15	0	1382.61	A0A087X0X3;P52272;Q59ES8;Q7KYM9;Q6P2D7;M0R2I7;M0QY96	A0A087X0X3	607	621	HNRNPM;ORF;HNRPM	Heterogeneous nuclear ribonucleoprotein M	yes	no	2	4.5994e-05	119.39		1	0	0	2238	113	2283	6062;6063;6064;6065;6066	6218;6219;6220;6221;6222	6221		87;88	5	0	0
MHNQIPQVTSDGKR	14	1	1609.8	A0A7I2V430;A0A7I2V4F0;A3RJH1;Q92499;A0A087WZ71;F1T0B3;A0A7I2V2M5;A0A087X2G1;A0A7I2YQ77;B4DP70;A0A7I2V4J3	A0A7I2V430	344	357	DDX1	ATP-dependent RNA helicase DDX1	yes	no	2;3	1.6981e-12	166.93		1	0	0	2242	232	2287	6079;6080;6081;6082;6083;6084;6085;6086	6235;6236;6237;6238;6239;6240;6241;6242	6242		153	8	0	0
MIAGQVLDINLAAEPK	16	0	1681.91	P07910;G3V4W0;G3V2Q1;B2R603;A8K9A4;G3V4C1;B2R5W2;B4DY08;G3V576;B3KX96;D3DPI2;G3V555;G3V575;G3V3K6;G3V5X6;B4DSU6;B4DMJ1;G3V251	P07910	74	89	HNRNPC;hCG_1641229	Heterogeneous nuclear ribonucleoproteins C1/C2	yes	no	2	1.8721e-31	184.1		1	0	0	2243	290	2288	6087;6088;6089	6243;6244;6245	6245		178	3	0	0
MKGSEVSLEKK	11	2	1234.66	A0A494C0M8;A0A494C171	A0A494C0M8	1	11			yes	no	2	0.023167	40.002		1	0	0	2249	209	2294	6098	6254	6254	43;44	150	1	0	0
MLQADPNKVSAR	12	1	1328.69	Q9Y3I0;B4DNA0	Q9Y3I0	199	210	RTCB	tRNA-splicing ligase RtcB homolog	yes	no	3	0.0030802	80.69		1	0	0	2256	687	2301	6117;6118;6119;6120;6121	6273;6274;6275;6276;6277	6277		369	5	0	0
MSRSSGRSGSMDPSGAHPSVR	21	2	2144.98	B4DDX2;Q07666;B2R7B5	B4DDX2	11	31	KHDRBS1	KH domain-containing, RNA-binding, signal transduction-associated protein 1	yes	no	3	0.011377	45.369		1	0	0	2271	342	2316	6154	6310	6310		206;207	1	0	0
MVNHFIAEFK	10	0	1234.62	P11142;E9PKE3;V9HW22;Q53GZ6;B3KTV0;Q96IS6;Q53HF2;B4E1Q1;A8K7Q2;E9PN89	P11142	237	246	HSPA8;HEL-S-72p	Heat shock cognate 71 kDa protein	no	no	2	0.0009943	128.86		1	0	0	2278	464;466	2323	6171	6327	6327		259	1	0	0
NAEPLINLDVNNPDFK	16	0	1811.91	Q549M8;Q9Y224;Q5RLJ0;G3V4C6;H0YJB9	Q549M8	116	131	C14orf166	UPF0568 protein C14orf166	yes	no	3	0.00037759	76.341		1	0	0	2284	616	2329	6181	6337	6337			1	0	0
NAESNAELK	9	0	974.467	A0A087WXM6;J3QQT2;J3KRX5;A0A024R261;A0A0A6YYL6;P18621;J3KRB3;A0A087WWH0;J3QS96;J3QLC8;A0A0A0MRF8	A0A087WXM6	97	105	RPL17;hCG_24487;RPL17-C18orf32	60S ribosomal protein L17	yes	no	2	0.0013817	154.49		1	0	0	2286	31	2331	6183;6184	6339;6340	6340			2	0	0
NDEELNKLLGR	11	1	1299.68	A0A024R017;Q93077;Q08AJ9;Q7L7L0;P04908	A0A024R017	90	100	HIST1H2AC;HIST1H2AB;HIST3H2A	Histone H2A;Histone H2A type 1-C;Histone H2A type 3;Histone H2A type 1-B/E	yes	no	2	9.0629e-16	197.27		1	0	0	2291	11	2336	6199;6200;6201;6202	6355;6356;6357;6358	6355			4	0	0
NEEDEGHSNSSPR	13	0	1456.58	A0A024RDF4;A1LU37;Q14103;D6RAF8;D6RD83	A0A024RDF4	73	85	HNRPD;HNRNPD	Heterogeneous nuclear ribonucleoprotein D0	yes	no	2;3	0.005633	89.548		1	0	0	2298	96	2343	6225;6226;6227;6228;6229	6381;6382;6383;6384;6385	6382			5	0	0
NFGEEVDDESLKELFSQFGK	20	1	2317.07	Q6IQ30;A0A7I2V4L7;Q13310;A0A7I2V598;B1ANR0;A0A7I2V5W9;H0Y5F5;Q15164;H0YCC8	Q6IQ30	197	216	PABPC4	Polyadenylate-binding protein;Polyadenylate-binding protein 4	yes	no	3	2.5592e-32	169.28		1	0	0	2306	628	2352	6255	6411	6411			1	0	0
NHEGDEDDSHVR	12	0	1408.56	H3BS86;Q9UNE7;H3BUD0;H3BTA3	H3BS86	164	175	STUB1	E3 ubiquitin-protein ligase CHIP	yes	no	3	0.00047287	126.76		1	0	0	2326	485	2373	6308	6468	6468			1	0	0
NIPGITLLNVSK	12	0	1267.75	Q59GY2;P36578;H3BM89;B4DMJ6;Q53G74;B4DMJ2	Q59GY2	237	248	RPL4	60S ribosomal protein L4	yes	no	2	0.0010852	143.4		1	0	0	2332	548	2379	6326;6327;6328;6329	6486;6487;6488;6489	6486			4	0	0
NLDDTIDDEKLR	12	1	1445.7	Q6IQ30;A0A7I2V4L7;Q13310;A0A7I2V598;B1ANR0;A0A7I2V5W9;H0Y5F5;H0YEU6;Q15164;Q3B867;Q147Y3;Q53GL4;P0CB38	Q6IQ30	300	311	PABPC4;PABPC4L	Polyadenylate-binding protein;Polyadenylate-binding protein 4;Polyadenylate-binding protein 4-like	yes	no	2;3	3.8771e-90	265.55		1	0	0	2357	628	2405	6418;6419;6420;6421;6422;6423	6579;6580;6581;6582;6583;6584	6582			6	0	0
NNLEALEDFEK	11	0	1320.62	A0A024R8D7;P31025	A0A024R8D7	140	150	LCN1	Lipocalin-1	yes	no	2	0.0020556	147.2		1	0	0	2386	64	2434	6501;6502;6503;6504;6505	6662;6663;6664;6665;6666	6662			5	0	0
NPQQQESLK	9	0	1070.54	B3KM36;B3KN59;O95816	B3KM36	103	111	BAG2	BAG family molecular chaperone regulator 2	yes	no	2	0.00055252	178.83		1	0	0	2395	324	2443	6528	6689	6689			1	0	0
NQTAEKEEFEHQQK	14	1	1744.8	P11142;E9PKE3;V9HW22;Q53GZ6;B3KTV0;Q96IS6;E9PNE6;B4E1Q1;A8K7Q2;E9PS65;Q96BE0;E9PM13;Q96H53;Q9NWW3;Q9NZ87	P11142	584	597	HSPA8;HEL-S-72p	Heat shock cognate 71 kDa protein	yes	no	3	0.00010835	110.92		1	0	0	2408	464	2456	6561;6562	6722;6723	6722			2	0	0
NQVALNPQNTVFDAK	15	0	1657.84	P0DMV8;P0DMV9;A0A0G2JIW1;A8K5I0;A0A1U9X7W4;B4DFN9;Q59EJ3;B4DNT8;B4E388;B4DNX1;B4E1T6	P0DMV8	57	71	HSPA1A;HSPA1B;HEL-S-103	Heat shock 70 kDa protein 1A;Heat shock 70 kDa protein 1B	yes	no	2	1.661e-46	221.55		1	0	0	2409	141	2457	6563;6564;6565	6724;6725;6726	6724			3	0	0
NQVAMNPQNTVFDAK	15	0	1675.8	B4DXY3;Q53FA3;B2RCQ9;A0A1U9X7X9;A0A1U9X7X4;A0A1U9X7W7;B4DI54;P34931	B4DXY3	59	73	HSPA1L	Heat shock 70 kDa protein 1-like	yes	no	2	8.4953e-05	99.215		1	0	0	2411	168	2460	6570;6571	6731;6732	6731		124	2	0	0
NREPVQLETLSIR	13	1	1553.85	P62314;J3QLI9;Q7Z5A3	P62314	49	61	SNRPD1	Small nuclear ribonucleoprotein Sm D1	yes	no	2;3	0.002494	88.338		1	0	0	2414	576	2463	6575;6576;6577	6736;6737;6738	6737			3	0	0
NTNPNFVR	8	0	960.478	A0A024R1N1;P35579;Q86XU5;B4E3S1;P35580	P35580	670	677	MYH9;MYH10	Myosin-9;Myosin-10	no	no	2	0.0032929	179.16		1	0	0	2439	547;22	2488	6641;6642;6643;6644;6645	6802;6803;6804;6805;6806	6806			5	0	0
NVESGEEELASK	12	0	1290.59	Q96HS1	Q96HS1	77	88	PGAM5	Serine/threonine-protein phosphatase PGAM5, mitochondrial	yes	yes	2	0.0045562	116.23		1	0	0	2441	657	2490	6647;6648;6649;6650	6808;6809;6810;6811	6809			4	0	0
NVTDVVNTCHDAGISKK	17	1	1856.91	Q9Y3I0	Q9Y3I0	477	493	RTCB	tRNA-splicing ligase RtcB homolog	yes	yes	3	2.6328e-07	105.5		1	0	0	2449	687	2498	6679;6680	6840;6841	6841			2	0	0
PMKMKDYNK	9	2	1153.56	U3KX66	U3KX66	41	49	ATP8	ATP synthase protein 8	yes	yes	2	0.020127	51.787		1	0	0	2473	700	2522	6727;6728;6729	6888;6889;6890	6888		375;376	3	0	0
QAGVFEPTIVK	11	0	1187.65	P17987;F5H282;E7EQR6	P17987	500	510	TCP1	T-complex protein 1 subunit alpha	yes	no	2	0.012	94.309		1	0	0	2491	530	2541	6765	6926	6926			1	0	0
QAQQERDELADEIANSSGK	19	1	2087.97	A0A024R1N1;P35579;Q6ZNL4	A0A024R1N1	1698	1716	MYH9;FLJ00279	Myosin-9	no	no	3	8.4912e-05	77.795		1	0	0	2498	22	2548	6779;6780	6940;6941	6941			2	0	0
QIEIQFAQGDR	11	0	1303.65	Q5JRI1;Q53GD7;A0A0S2Z504;O75494;Q8WXF0	Q5JRI1	80	90	SRSF10;SRSF12	Serine/arginine-rich splicing factor 10;Serine/arginine-rich splicing factor 12	yes	no	2	3.9924e-08	175.73		1	0	0	2532	151	2582	6861;6862;6863;6864	7024;7025;7026;7027	7026			4	0	0
QILGVIDKK	9	1	1012.63	Q14444;E9PLA9;B4DSF8	Q14444	56	64	CAPRIN1	Caprin-1	yes	no	2	0.0048338	129.42		1	0	0	2537	605	2587	6876;6877;6878;6879	7039;7040;7041;7042	7040			4	0	0
QLEEAEEEATR	11	0	1303.59	P35580	P35580	1885	1895	MYH10	Myosin-10	yes	yes	2	0.00012245	156.83		1	0	0	2551	547	2601	6924;6925;6926	7087;7088;7089	7088			3	0	0
QQHVIETLIGK	11	0	1264.71	Q96GI1;B4DE30;E7ENZ3;B4DYC8;B7ZAR1;B4DDU6;B4DZT5;B4DXI1;E9PCA1;Q9BU08;V9HW37;P48643;B4DX08;Q9HB74	Q96GI1	349	359	CCT5;HEL-S-69	T-complex protein 1 subunit epsilon	yes	no	2	0.0078981	117.3		1	0	0	2577	341	2627	6978	7141	7141			1	0	0
QRPQATAEQIR	11	1	1296.69	B4DYY5;F8W726;Q14157;Q5VU77;Q5VU81;Q5VU80;Q5VU79;Q5VU78	B4DYY5	27	37	UBAP2L	Ubiquitin-associated protein 2-like	yes	no	2	8.3583e-27	215.06		1	0	0	2587	362	2637	7001;7002;7003;7004	7164;7165;7166;7167	7166			4	0	0
QSSGASSSSFSSSR	14	0	1360.59	O00571;A0A2R8YCW1;A0A2R8Y645;A0A0D9SG12;Q59GX6;A0A2R8YF78;A0A2R8Y4A4;B5BTY4;A0A0D9SFB3;A0A2R8YFR4;A0A2R8Y5G6;A0A2R8YFS5;A0A2U3TZJ9;A0A0D9SF53;A0A2R8Y7T2;F6S8Q4;A0A2R8YDT5;Q5S4N1;B4DLU5;A0A0J9YVQ7;A0A087WVZ1	O00571	604	617	DDX3X	ATP-dependent RNA helicase DDX3X	yes	no	2	4.8681e-79	242.45		1	0	0	2590	138	2640	7018;7019;7020	7181;7182;7183	7183			3	0	0
RDDPAAR	7	1	799.394	B4DDX2;Q07666;B2R7B5	B4DDX2	4	10	KHDRBS1	KH domain-containing, RNA-binding, signal transduction-associated protein 1	yes	no	2	0.011255	134.08		1	0	0	2620	342	2670	7102	7269	7269			1	0	0
REIDTLNER	9	1	1144.58	A0A3B3IT47;Q9Y2I8;E7EQ49;A0A087WTQ2;C9JGR9	A0A3B3IT47	81	89	WDR37	WD repeat-containing protein 37	yes	no	2	0.017823	145.25		1	0	30713000	2625	203	2675	7112	7279	7279			1	0	45760000
RGEEGHDPKEPEQLR	15	2	1775.86	A0A7I2V2R3;A0A7I2V5D8;A0A7I2V402;A0A384NL63;P51991;A0A7I2V4J6;B4E036	A0A7I2V2R3	21	35	HNRNPA3	Heterogeneous nuclear ribonucleoprotein A3	yes	no	2	1.5347e-05	131.37		1	0	0	2638	199	2688	7136;7137	7303;7304	7304			2	0	0
RGFGFVTFDDHDPVDK	16	1	1850.86	A0A7I2V4I6;P22626;A0A7I2V4S4;A0A7I2V4N1;A0A7I2V3P1;A0A7I2V3P7;A0A7I2V323;A0A384NL58;A0A087WUI2;A0A024RA28;I6L957;A0A7I2V4N0	A0A7I2V4I6	153	168	HNRNPA2B1;HNRPA2B1	Heterogeneous nuclear ribonucleoproteins A2/B1	yes	no	3	5.9449e-08	128.64		1	0	0	2641	233	2691	7140;7141;7142	7307;7308;7309	7309			3	0	0
RIALTDNALIAR	12	1	1325.78	A0A024R814;P18124;A8MUD9;O95036	A0A024R814	177	188	RPL7;WUGSC:H_RG054D04.1	60S ribosomal protein L7	yes	no	3	0.0013351	102.4		1	0	0	2648	62	2698	7151;7152	7319;7320	7320			2	0	0
RLEEEEAAAEKEDR	14	2	1673.79	Q5T280;B4E0X4;Q9P041	Q5T280	56	69	C9orf114	Putative methyltransferase C9orf114	yes	no	3	0.030471	51.771		1	0	0	2664	621	2714	7192	7362	7362			1	0	0
RLPDAHSDYAR	11	1	1299.63	A0A0S2Z4Z0;Q96PK6;B4DNG4	A0A0S2Z4Z0	637	647	RBM14	RNA-binding protein 14	yes	no	2	0.00055129	136.02		1	0	0	2678	149	2728	7242;7243	7413;7414	7413			2	0	0
RPRPPNAPSQDGK	13	2	1418.74	A0A024RAV4;A0A024RAQ1;P16989;Q96GD7	A0A024RAV4	269	281	CSDA;YBX3	Y-box-binding protein 3	yes	no	3	0.0061022	73.877		1	0	0	2699	74	2749	7292;7293	7463;7464	7464			2	0	0
RQAQQERDELADEIANSSGK	20	2	2244.07	A0A024R1N1;P35579;Q6ZNL4	A0A024R1N1	1697	1716	MYH9;FLJ00279	Myosin-9	no	no	3	1.5353e-84	214.55		1	0	0	2704	22	2754	7315;7316	7486;7487	7487			2	0	0
RSTDFTSR	8	1	968.468	B4E0S6;O43143	B4E0S6	665	672	DHX15	Pre-mRNA-splicing factor ATP-dependent RNA helicase DHX15	yes	no	2	0.0089577	135.71		1	0	0	2724	366	2775	7355	7528	7528			1	0	0
RVEEDIQQQK	10	1	1271.65	P15924	P15924	1425	1434	DSP	Desmoplakin	yes	yes	2	0.0003522	152.34		1	0	0	2731	525	2782	7376;7377;7378;7379	7549;7550;7551;7552	7549			4	0	0
RYAHVVLR	8	1	1012.59	P62269	P62269	39	46	RPS18	40S ribosomal protein S18	yes	yes	2	0.010996	132.29		1	0	0	2742	572	2793	7406	7579	7579			1	0	0
SAAQAAAQTNSNAAGK	16	0	1459.7	Q63HR1;Q5VU21;D3DQ69;D3DQ70;Q8NC51	Q63HR1	53	68	DKFZp686P17171;SERBP1	Plasminogen activator inhibitor 1 RNA-binding protein	yes	no	2	1.419e-66	224.03		1	0	0	2745	447	2796	7410;7411;7412;7413	7585;7586;7587;7588	7588			4	0	0
SAVEDEGLK	9	0	946.461	P0DMV8;P0DMV9;A0A0G2JIW1;A8K5I0;A0A1U9X7W4;B4DFN9;Q59EJ3;B4DI39;B4DNT8;B4DWK5;B4E388;B4E1S9;B4DVU9;V9GZ37;B3KTT5;B4DNX1;B4E1T6	P0DMV8	551	559	HSPA1A;HSPA1B;HEL-S-103	Heat shock 70 kDa protein 1A;Heat shock 70 kDa protein 1B	yes	no	2	0.016147	114.89		1	0	0	2762	141	2813	7455;7456	7630;7631	7630			2	0	0
SAVEDEGLKGK	11	1	1131.58	P0DMV8;P0DMV9;A0A0G2JIW1;A8K5I0;A0A1U9X7W4;B4DFN9;Q59EJ3;B4DI39;B4DNT8;B4DWK5;B4E388;B4E1S9;B4DVU9;V9GZ37;B3KTT5;B4DNX1;B4E1T6	P0DMV8	551	561	HSPA1A;HSPA1B;HEL-S-103	Heat shock 70 kDa protein 1A;Heat shock 70 kDa protein 1B	yes	no	3	0.0041823	83.397		1	0	0	2763	141	2814	7457	7632	7632			1	0	0
SDVEAIFSK	9	0	994.497	P07910;G3V4W0;G3V2Q1;B2R603;A8K9A4;G3V4C1;B2R5W2;B4DY08;G3V576;B3KX96;D3DPI2;A0A0G2JNQ3;B2RXH8;O60812;G3V555;P0DMR1;B7ZW38;A0A0G2JPF8;G3V575;G3V3K6;G3V5X6;B4DSU6;B4DMJ1;G3V251;Q6PKD2;G3V4M8;Q569J8;G3V2H6	P07910	31	39	HNRNPC;hCG_1641229;HNRNPCL2;HNRNPCL1;HNRNPCL4;HNRNPCL3;HNRPCL1;HNRPC	Heterogeneous nuclear ribonucleoproteins C1/C2;Heterogeneous nuclear ribonucleoprotein C-like 2;Heterogeneous nuclear ribonucleoprotein C-like 1;Heterogeneous nuclear ribonucleoprotein C-like 4;Heterogeneous nuclear ribonucleoprotein C-like 3	yes	no	2	0.020004	108.98		1	0	0	2779	290	2831	7499;7500;7501;7502	7674;7675;7676;7677	7674			4	0	0
SESPKEPEQLR	11	1	1298.65	P09651;A0A024RB53;A0A024RAZ7;A0A7I2V3R8;Q6IPF2;F8W6I7;A0A7I2V3W0;A0A024RC46;A0A7I2V2L6;F8VTQ5;B4DP35;B4E0B5;F8W646;A0A7I2YQ85	P09651	4	14	HNRNPA1;HNRPA1;hCG_2020860	Heterogeneous nuclear ribonucleoprotein A1;Heterogeneous nuclear ribonucleoprotein A1, N-terminally processed	yes	no	2	2.4832e-20	207.34		1	0	0	2793	80	2845	7536;7537;7538;7539;7540	7711;7712;7713;7714;7715	7713			5	0	0
SETAPAAPAAAPPAEK	16	0	1477.74	P16403	P16403	2	17	HIST1H1C	Histone H1.2	yes	yes	2	3.8472e-06	118.61		1	0	0	2795	528	2847	7547;7548;7549	7722;7723;7724	7722			3	0	0
SFQQSSLSR	9	0	1038.51	P43243;A8MXP9;A0A0R4J2E8;Q68D11;D6REM6;D6R991;Q68E03;D6R8Z5;A0A1B0GX04;D6REK4;D6RCM3;D6RBS2;D6R9F3;D6RB45	P43243	4	12	MATR3;DKFZp686K23100;DKFZp686L22104	Matrin-3	yes	no	2	0.0075515	128.69		1	0	0	2807	144	2860	7581;7582;7583	7756;7757;7758	7758			3	0	0
SGGGYGGDR	9	0	824.341	Q92804;B4E312;A0A075B7F4;A0A075B7C1	Q92804	423	431	TAF15	TATA-binding protein-associated factor 2N	yes	no	2	0.014326	88.819		1	0	22894000	2830	653	2883	7638;7639	7824;7825	7825			2	0	34111000
SGKAPILIATDVASR	15	1	1497.85	A0A1X7SBZ2;A0A5H1ZRQ2;Q59F66;Q92841;B4DZQ7;A0A0U1RQJ0	A0A1X7SBZ2	466	480	DDX17	Probable ATP-dependent RNA helicase DDX17	yes	no	3	0.00023589	84.046		1	0	0	2833	174	2886	7642;7643;7644;7645	7828;7829;7830;7831	7829			4	0	0
SGNTATLTIR	10	0	1032.56	A0A5C2GAB1;A0A5C2G4T0	A0A5C2GAB1	66	75			yes	no	2	7.2211e-14	183.43		1	0	0	2837	220	2890	7657;7658;7659;7660;7661	7845;7846;7847;7848;7849	7849			5	0	0
SGTTSESGALSLEPSHIGDLQK	22	0	2213.08	Q7Z417	Q7Z417	582	603	NUFIP2	Nuclear fragile X mental retardation-interacting protein 2	yes	yes	3	3.814e-31	137.09		1	0	0	2843	638	2897	7687;7688;7689	7876;7877;7878	7877			3	0	0
SGVGNVFIK	9	0	919.513	Q6IQ30;A0A7I2V4L7;Q13310;A0A7I2V598;B1ANR0;A0A7I2V5W9;H0YEQ8;B1ANR1	Q6IQ30	96	104	PABPC4	Polyadenylate-binding protein;Polyadenylate-binding protein 4	no	no	2	0.009373	125.81		1	0	0	2846	628	2900	7696;7697;7698;7699	7885;7886;7887;7888	7885			4	0	0
SHEESHKE	8	1	981.415	P05109	P05109	86	93	S100A8	Protein S100-A8;Protein S100-A8, N-terminally processed	yes	yes	2	0.0034127	146.54		1	0	0	2853	515	2908	7720	7909	7909			1	0	0
SIEEQLGTEIKPIPSNIDK	19	1	2110.12	P26196;B2R858	P26196	448	466	DDX6	Probable ATP-dependent RNA helicase DDX6	yes	no	3	1.7667e-11	123		1	0	0	2861	313	2917	7740;7741	7929;7930	7930			2	0	0
SIFQHIQSAQSQR	13	0	1528.77	A0A3B3ITZ9;Q9Y2W1	A0A3B3ITZ9	609	621	THRAP3	Thyroid hormone receptor-associated protein 3	yes	no	2;3	8.776e-06	155.48		1	0	0	2863	204	2919	7744;7745;7746;7747;7748	7933;7934;7935;7936;7937	7935			5	0	0
SKEITVR	7	1	831.481	P17844;J3KTA4;B5BUE6;B4DN41;A0A7I2V2S0;A0A7I2V507;Q59E92;J3QRQ7;C1IK54;J3QR02;J3KTQ4	P17844	79	85	DDX5;DDX5-ETV4 fusion	Probable ATP-dependent RNA helicase DDX5	yes	no	2	0.020399	134.06		1	0	0	2874	529	2930	7780	7969	7969			1	0	0
SKFADLSEAANR	12	1	1307.65	P08670;V9HWE1;B0YJC4;Q53HU8;B3KRK8;B0YJC5	P08670	293	304	VIM;HEL113	Vimentin	yes	no	2;3	0.0085503	116.77		1	0	0	2875	518	2931	7781;7782	7970;7971	7971			2	0	0
SKVDEAVAVLQAHHAK	16	1	1701.92	Q6IQ30;A0A7I2V4L7;Q13310;A0A7I2V598;B1ANR0;A0A7I2V5W9;H0Y5F5;H0YEU6;Q59GZ7;A0A7I2V4V6;H0Y6X6;H0YER0	Q6IQ30	630	645	PABPC4	Polyadenylate-binding protein;Polyadenylate-binding protein 4	yes	no	3	2.7366e-11	133.87		1	0	0	2883	628	2941	7802;7803;7804;7805	7991;7992;7993;7994	7992			4	0	0
SLQSVAEER	9	0	1017.51	B4DLP4;A0A024R2Q4;P61313;E7EX53;A0A2R8Y738;A0A2R8YEM3;E7EQV9	B4DLP4	97	105	RPL15	Ribosomal protein L15;60S ribosomal protein L15	yes	no	2	0.00022241	182.69		1	0	0	2910	35	2969	7879;7880;7881;7882;7883	8068;8069;8070;8071;8072	8068			5	0	0
SLTQNSAPSR	10	0	1059.53	V9HW07;A8K5C8;P17031	V9HW07	134	143	HEL-179;ZNF26	Zinc finger protein 26	yes	no	2	0.0069058	112.41		1	0	37037000	2912	277	2971	7885;7886	8074;8075	8074			2	0	55183000
SLVIPEKFQHILR	13	1	1578.92	P62269;A0A0G2JQH2;Q5GGW2	P62269	2	14	RPS18	40S ribosomal protein S18	yes	no	3	0.00096441	84.169		1	0	0	2916	572	2975	7892;7893	8081;8082	8081	122		2	0	0
SLYASSPGGVYATR	14	0	1427.7	P08670;V9HWE1;B0YJC4;Q53HU8;B3KRK8;A0A1B0GTT5;A0A1B0GVG8	P08670	51	64	VIM;HEL113	Vimentin	yes	no	2	0.00065163	118.9		1	0	0	2919	518	2979	7901;7902	8090;8091	8091			2	0	0
SPIATIR	7	0	756.449	A0A3B3IT47;Q9Y2I8	A0A3B3IT47	482	488	WDR37	WD repeat-containing protein 37	yes	no	2	0.014479	167.24		1	0	0	2933	203	2993	7930	8119	8119			1	0	0
SRPETGRPR	9	2	1054.56	Q59GE4;P46783;F6U211;A0A2R8Y7H1;S4R435;A0A2R8YFH6;A0A1W2PQS6;Q9NQ39;A0A2R8Y6L3	Q59GE4	106	114	RPS10;RPS10-NUDT3;RPS10P5	40S ribosomal protein S10;Putative 40S ribosomal protein S10-like	yes	no	3	0.0041225	111.06		1	0	0	2967	557	3027	8026;8027	8215;8216	8215			2	0	0
SSDSKPGVSSK	11	1	1077.53	Q7Z417	Q7Z417	303	313	NUFIP2	Nuclear fragile X mental retardation-interacting protein 2	yes	yes	2	0.0048326	105.2		1	0	0	2971	638	3031	8033;8034	8222;8223	8222			2	0	0
SSGNSPTPVSR	11	0	1087.53	O95429;H0YBT1;B2RA34	O95429	175	185	BAG4	BAG family molecular chaperone regulator 4	yes	no	2	0.00089245	137.95		1	0	0	2982	514	3042	8058	8248	8248			1	0	0
SSGPTSLFAVTVAPPGAR	18	0	1713.9	B4DLR3;A0A1W2PPS1;A0A1X7SBS1;A0A1W2PP35;A0A1W2PP22;Q00839;B3KX72;Q96BA7	B4DLR3	165	182	HNRNPU	Heterogeneous nuclear ribonucleoprotein U	no	no	2	4.8447e-39	186.16		1	0	0	2983	171;337	3043	8059;8060;8061	8249;8250;8251	8251			3	0	0
SSGVPDRFSGSK	12	1	1222.59	A0A5C2H1Z5	A0A5C2H1Z5	57	68			yes	yes	3	0.0010478	117.09		1	0	0	2986	224	3046	8065;8066	8255;8256	8256			2	0	0
SSLGPVGLDK	10	0	971.529	P17987;E7ERF2;F5GZI8;F5GYL4;F5H726;F5H676;F5H136	P17987	34	43	TCP1	T-complex protein 1 subunit alpha	yes	no	2	0.0053788	112.01		1	0	0	2987	530	3047	8067	8257	8257			1	0	0
SSLLEKGLDGAKK	13	2	1344.76	P81605	P81605	63	75	DCD	Dermcidin;Survival-promoting peptide;DCD-1	yes	yes	3	0.0030452	80.522		1	0	0	2989	590	3049	8072;8073;8074	8262;8263;8264	8262			3	0	0
SSSSSAASDTATSTQRPLR	19	1	1908.91	A0A494C001;A0A499FJY3;A0A087WWP4;Q96T37;Q59EY1	A0A494C001	827	845	RBM15	Putative RNA-binding protein 15	yes	no	3	7.6966e-08	89.982		1	0	0	3001	107	3062	8110;8111;8112	8301;8302;8303	8302			3	0	0
STELLIR	7	0	830.486	B4E380;K7EK07;B2R4P9;P84243;K7EMV3;A0A590UJJ6;B4DEB1;B2R6Y1;K7ES00;K7EP01;Q6NXT2;P68431;Q71DI3;Q16695;Q5TEC6	Q5TEC6	58	64	H3F3B;H3F3A;H3F3C;HIST1H3A;HIST2H3A;HIST3H3;HIST2H3PS2	Histone H3;Histone H3.3;Histone H3.3C;Histone H3.1;Histone H3.2;Histone H3.1t	no	no	2	0.0020922	159.19		1	0	0	3006	307;588;626	3067	8119;8120;8121;8122	8310;8311;8312;8313	8313			4	0	0
STGEAFVQFASK	12	0	1270.62	Q53F48;A0A024QZK8;P31942	Q53F48	56	67	HNRPH3;HNRNPH3	Heterogeneous nuclear ribonucleoprotein H3	yes	no	2	2.5337e-14	188.87		1	0	0	3010	7	3071	8133;8134;8135;8136;8137	8324;8325;8326;8327;8328	8326			5	0	0
STGETIR	7	0	762.387	P17987;E7ERF2;F5GZ03;F5GZI8;F5GYL4	P17987	12	18	TCP1	T-complex protein 1 subunit alpha	yes	no	2	0.02009	128.38		1	0	0	3012	530	3073	8139	8330	8330			1	0	0
STTTGHLIYK	10	0	1119.59	Q5VTE0;P68104;A0A4D5RAC7;A0A4D5RAN2;A0A4D5RA76;A0A4D5RAC9;A0A7I2V659;A0A7I2V3H3;A0A087WVQ9;Q53HM9;A0A7I2V5N4;Q53GE9;Q53G85;Q53HR5;Q6IPN6;Q6IPS9;Q6IPT9;A0A4D5RA98;A0A4D5RBG5;Q53HQ7;A0A2U3TZH3;Q05639;Q53GA1;A0A4D5RA52;A0A4D5RAF1;A0A4D5RBK4;A0A4D5RAB8;A0A4D5RBI9;A0A2R8Y488;A0A087WV01;A0A4D5RA61;B4DNE0;Q9H2I7;A0A2R8Y660;A0A6Q8PFK6;A0A2R8YDN5;A0A4D5RAB4;A0A4D5RAB0;Q6NS35;A0A4D5RAC3;A0A4D5RAA6;A0A4D5RA…	Q5VTE0	21	30	EEF1A1P5;EEF1A1;EEF1A2	Putative elongation factor 1-alpha-like 3;Elongation factor 1-alpha 1;Elongation factor 1-alpha;Elongation factor 1-alpha 2	yes	no	2;3	0.0006797	135.79		1	0	0	3022	105	3084	8165;8166;8167;8168	8356;8357;8358;8359	8358			4	0	0
SVLIGEFLEK	10	0	1133.63	A8K946;O43148;Q05D80;Q05DQ2;K7EP06;B7Z8S9	A8K946	181	190	RNMT	mRNA cap guanine-N7 methyltransferase	yes	no	2	0.012463	96.331		1	0	0	3027	287	3089	8181;8182;8183;8184	8372;8373;8374;8375	8372			4	0	0
SVTEQGAELSNEER	14	0	1547.71	E7ESK7;D0PNI1;E7EX29;P63104;E5RGE1;E5RIR4;E9PD24;E7EVZ2;Q6LD62	E7ESK7	28	41	YWHAZ;14-3-3 protein	14-3-3 protein zeta/delta	yes	no	2	2.1168e-12	168.3		1	0	0	3034	445	3096	8204;8205;8206;8207	8395;8396;8397;8398	8395			4	0	0
SYELPDGQVITIGNER	16	0	1789.88	P63261;I3L4N8;B4DVQ0;B4E335;P60709;Q8WVW5;Q53G76;Q53G99;Q53GK6;Q1KLZ0;B4E3A4;B4DW52;E7EVS6;P63267;P68133;P68032;B7Z6P1;B3KUD3;P62736;D2JYH4;A0A2R8Y793;A8K3K1;A0A6Q8PFE4;B3KW67;Q13707;Q6S8J3;B3KWQ3;A5A3E0;B7ZAP6;Q6PJ43;B4DUI8;V9HVZ7;Q96FU6;Q96DE1;B3KPP5;Q562R1;F1BXA6;A4UCT3;A5GZ75;A0A2R8YEA7;Q9BYX7;K4ENJ5;G8FSY7;K4EQ44;A0A173GMX0;K4EP00	P63261	239	254	ACTG1;ACTB;PS1TP5BP1;ACTG2;ACTA1;ACTC1;ACTA2;POTEE;POTEF;HEL-176;ACTBL2;POTEKP	Actin, cytoplasmic 2;Actin, cytoplasmic 2, N-terminally processed;Actin, cytoplasmic 1;Actin, cytoplasmic 1, N-terminally processed;Actin, gamma-enteric smooth muscle;Actin, alpha skeletal muscle;Actin, alpha cardiac muscle 1;Actin, aortic smooth muscle;POTE ankyrin domain family member E;POTE ankyrin domain family member F;Beta-actin-like protein 2;Putative beta-actin-like protein 3;Putative bet…	yes	no	2	0.00095336	82.362		1	0	0	3039	357	3101	8213	8404	8404			1	0	0
TAGINVR	7	0	729.413	B7Z9L0;B7Z2Z8;A8K3C3;P50991;B7Z2F4	B7Z9L0	434	440	CCT4	T-complex protein 1 subunit delta	yes	no	2	0.023467	126.68		1	0	0	3054	266	3116	8246	8438	8438			1	0	0
TALIHDGLAR	10	0	1065.59	P25398	P25398	24	33	RPS12	40S ribosomal protein S12	yes	yes	2;3	0.001669	131.41		1	0	0	3057	535	3119	8257;8258;8259;8260;8261	8449;8450;8451;8452;8453	8451			5	0	0
TATQLAVNK	9	0	944.529	Q6IBT3;Q53HV2;Q99832;F8WAM2;B7Z7I4	Q6IBT3	127	135	CCT7	T-complex protein 1 subunit eta	yes	no	2	0.016766	137.18		1	0	21762000	3065	615	3127	8282	8474	8474			1	0	32424000
TDEEGKDVPDHAVLEMK	17	1	1911.89	M0R3F1;A8K3W4;A0A024R0J9;A0A0A0MRA5;B7Z4B8;A8K6U7;Q9BUJ2;A8K5K0;B3KM60	M0R3F1	395	411	HNRNPUL1;HNRPUL1	Heterogeneous nuclear ribonucleoprotein U-like protein 1	yes	no	3	0.000559	73.983		1	0	0	3076	14	3138	8308;8309;8310	8500;8501;8502	8500		7	3	0	0
TDSAINR	7	0	775.382	A0A3B3IT47;Q9Y2I8	A0A3B3IT47	489	495	WDR37	WD repeat-containing protein 37	yes	no	2	0.0092286	148.28		1	0	0	3078	203	3140	8312	8504	8504			1	0	0
TDTLEDLFPTTK	12	0	1379.68	P13010;Q53T09	P13010	470	481	XRCC5	X-ray repair cross-complementing protein 5	yes	no	2	2.4026e-08	164.66		1	0	0	3080	524	3142	8315;8316;8317;8318	8507;8508;8509;8510	8509			4	0	0
TDYNASVSVPDSSGPER	17	0	1779.79	B4DUQ1;A0A024R228;P61978;Q5EC54;Q5T6W2	B4DUQ1	70	86	HNRPK;HNRNPK	Heterogeneous nuclear ribonucleoprotein K	yes	no	2	1.9096e-09	137.62		1	0	0	3081	30	3143	8319;8320	8511;8512	8511			2	0	0
TEELKPQVEEK	11	1	1328.68	A0A024RDB2;Q9UN86;A0A024RDE5;A8K6V7;A0A7I2YQD9;A0A7I2V3E2;A0A7I2YQS2;A0A7I2V647;A0A7I2V3P9	A0A024RDB2	206	216	G3BP2	Ras GTPase-activating protein-binding protein 2	no	no	2	1.3246e-45	235.01		1	0	0	3086	93;237	3148	8329;8330;8331;8332;8333	8521;8522;8523;8524;8525	8525			5	0	0
TEQGGAHFSVSSLAEGSVTSVGSVNPAENFR	31	0	3120.47	P13010;Q53T09	P13010	569	599	XRCC5	X-ray repair cross-complementing protein 5	yes	no	3	9.4399e-07	56.22		1	0	0	3091	524	3153	8343;8344	8537;8538	8538			2	0	0
TIEKFEK	7	1	893.486	Q5VTE0;P68104;A0A4D5RAC7;A0A4D5RAN2;A0A4D5RA76;A0A4D5RAC9;A0A7I2V659;A0A7I2V3H3;A0A087WVQ9;Q53HM9;A0A7I2V5N4;Q53GE9;Q53G85;Q53HR5;Q6IPN6;Q6IPS9;Q6IPT9;A0A4D5RA98;A0A4D5RBG5;Q53HQ7;A0A2U3TZH3;Q05639;A8K9C4;Q53GA1;A0A4D5RA52;Q53G89;A0A4D5RAF1;A0A4D5RBK4;A0A4D5RAB8;A0A4D5RBI9;A0A2R8Y488;A0A087WV01;A0A4D5RA61;B4DNE0;Q9H2I7;A0A2R8Y660;A0A6Q8PFK6;A0A2R8YDN5;A0A4D5RAB4;A0A4D5RAB0;Q6NS35;A0A4D5RAC3;A0A4D…	Q5VTE0	38	44	EEF1A1P5;EEF1A1;EEF1A2	Putative elongation factor 1-alpha-like 3;Elongation factor 1-alpha 1;Elongation factor 1-alpha;Elongation factor 1-alpha 2	yes	no	2	0.020722	133.6		1	0	0	3123	105	3185	8425;8426	8628;8629	8629			2	0	0
TIGISVDPR	9	0	956.529	Q6NZ55;A8K4C8;P26373;J3QSB4	Q6NZ55	93	101	RPL13	60S ribosomal protein L13	yes	no	2	0.012868	91.069		1	0	53164000	3124	270	3186	8427;8428	8630;8631;8632	8631			3	0	79210000
TLATDILMGVLK	12	0	1273.73	B4E0S6;O43143	B4E0S6	255	266	DHX15	Pre-mRNA-splicing factor ATP-dependent RNA helicase DHX15	yes	no	2	0.004373	91.867		1	0	0	3153	366	3215	8489;8490;8491;8492	8694;8695;8696;8697	8694		218	4	0	0
TLIQNCGASTIR	12	0	1332.68	B3KX11;Q59H77;P49368;B4DUR8;Q2TU64	B3KX11	427	438	CCT3	T-complex protein 1 subunit gamma	yes	no	2	0.0010906	134.68		1	0	0	3162	335	3224	8521	8726	8726			1	0	0
TLKAESLEEKNMAK	14	2	1590.83	H0YJE3;G9BAV9;Q6ZU80	H0YJE3	427	440	CEP128;LEDP/132	Centrosomal protein of 128 kDa	yes	no	2	0.0021278	78.655		1	0	0	3163	477	3225	8522;8523;8524;8525	8727;8728;8729;8730	8727	108;109	265	4	0	0
TLSDYNIQK	9	0	1080.55	P62987;L8B196;F5H747;F5GXK7;J3QKN0;Q5U5U6;Q5PY61;Q9UFQ0;Q96C32;Q96MH4;A0A2R8Y422;A0A248RGE3;Q96H31;L8B4R0;A8K674;L8B4M0;L8B4Z6;L8B4J3;Q66K58;B2RDW1;L8B4I8;Q59EM9;J3QS39;Q3MIH3;P0CG47;P0CG48;P62979;F5H6Q2;F5H388;Q5UGI3;B4DV12;M0R1M6;J3QTR3;F5H265;M0R2S1;F5H2Z3;F5GYU3;Q5RKT7;M0R1V7;Q49A90;Q8WYN9	P62987	55	63	UBA52;UbC;UBC;UBB;DKFZp434K0435;HEL112;RPS27A	Ubiquitin-60S ribosomal protein L40;Ubiquitin;60S ribosomal protein L40;Polyubiquitin-B;Ubiquitin;Polyubiquitin-C;Ubiquitin;Ubiquitin-40S ribosomal protein S27a;Ubiquitin;40S ribosomal protein S27a	yes	no	2	0.02673	100.45		1	0	0	3173	175	3236	8564	8774	8774			1	0	0
TLSSPSNRPSGETSVPPPPAVGR	23	1	2289.17	A0A024QZC0;A0A024QZB7;A0A024QZ91;Q8WWM7	Q8WWM7	421	443	ATXN2L	Ataxin-2-like protein	no	no	3	0.00057502	69.122		1	0	0	3178	649;3	3241	8579;8580	8791;8792	8791			2	0	0
TSIAIDTIINQK	12	0	1315.73	V9HW26;P25705;K7EK77;K7ENJ4	V9HW26	219	230	HEL-S-123m;ATP5A1	ATP synthase subunit alpha;ATP synthase subunit alpha, mitochondrial	yes	no	2	0.00076407	137.95		1	0	0	3230	536	3294	8735;8736;8737;8738	8947;8948;8949;8950	8947			4	0	0
TTHFVEGGDAGNR	13	0	1359.62	A0A024R814;P18124;A8MUD9;O95036	A0A024R814	235	247	RPL7;WUGSC:H_RG054D04.1	60S ribosomal protein L7	yes	no	2	0.0059962	88.681		1	0	0	3243	62	3307	8788	9001	9001			1	0	0
TTLQVDTLNAELAAER	16	0	1743.9	P35580	P35580	1762	1777	MYH10	Myosin-10	yes	yes	2	9.3715e-17	163.51		1	0	0	3245	547	3309	8794;8795;8796	9007;9008;9009	9009			3	0	0
TTPSYVAFTDTER	13	0	1486.69	P0DMV8;P0DMV9;A0A0G2JIW1;A8K5I0;A0A1U9X7W4;B4DFN9;Q59EJ3;B4DI39;B4DWK5;B4DNX1;B4E1T6;B4DNV4;P11142;E9PKE3;V9HW22;Q53GZ6;B3KTV0;Q53HF2;E9PNE6;A0A024R6B5;A0A384MDT7;P54652;B4DTX2;E9PLF4;E9PK54;E9PQK7;E9PQQ4;E9PPY6;E9PN25;B3KUS2;E9PI65;Q53FC7;B3KSM6;B2R6X5;A0A384NKX5;P17066;P48741;B4DXY3;Q53FA3;B2RCQ9;A0A1U9X7X9;A0A1U9X7X4;A0A1U9X7W7;B4DI54;P34931	P0DMV8	37	49	HSPA1A;HSPA1B;HEL-S-103;HSPA8;HEL-S-72p;HSPA2;HSPA6;HSPA7;HSPA1L	Heat shock 70 kDa protein 1A;Heat shock 70 kDa protein 1B;Heat shock cognate 71 kDa protein;Heat shock-related 70 kDa protein 2;Heat shock 70 kDa protein 6;Putative heat shock 70 kDa protein 7;Heat shock 70 kDa protein 1-like	no	no	2	1.1329e-09	168.46		1	0	0	3250	141;464;198;168	3314	8811;8812;8813;8814	9024;9025;9026;9027	9024			4	0	0
TVGATALPR	9	0	884.508	Q7Z759;Q53HU0;P50990;H7C4C8	Q7Z759	276	284	CCT8	T-complex protein 1 subunit theta	yes	no	2	0.015139	116.73		1	0	0	3261	563	3325	8837	9050	9050			1	0	0
VAEQAANDLR	10	0	1085.55	Q7Z406;A1L2Z2;B4E177	Q7Z406	1553	1562	MYH14	Myosin-14	yes	no	2	0.00092222	149.94		1	0	0	3283	637	3348	8898;8899;8900	9116;9117;9118	9118			3	0	0
VCEEIAIIPSKK	12	1	1385.76	H3BNC9;P08708;H0YN88;A0A075B716;H0YN73	H3BNC9	483	494	RPS17	40S ribosomal protein S17	yes	no	3	0.01268	72.29		1	0	0	3299	483	3364	8936;8937	9157;9158	9158			2	0	0
VDEAVAVLQAHQAK	14	0	1477.79	A0A024R9C1;P11940;A0A7I2V4N4;H0YAR2;E7EQV3;A0A7I2V649;B4DZW4;A0A7I2YQE4;A0A7I2YQ88;B3KT93;A0A7I2YQ90;A0A087WTT1;E7ERJ7;B4DQX0;Q5VX58;Q3ZCS4;Q9H361;Q2VIP3;H0YB75;H0YAS6;H0YAS7;H0YC10;L0R533	A0A024R9C1	607	620	PABPC1;PABPC3;RLIM	Polyadenylate-binding protein;Polyadenylate-binding protein 1;Polyadenylate-binding protein 3	yes	no	3	0.0034865	71.548		1	0	0	3304	69	3369	8948;8949	9169;9170	9169			2	0	0
VDNDENEHQLSLR	13	0	1567.72	P06748;A0A7I2YQC0;A0A0S2Z491;A4ZU86;A0A0S2Z4G7;A0A7I2V5S2;A0A140VJQ2;A0A7I2V3U2;A0A7I2V2X9;A0A7I2V433;A0A7I2V3G5;A0A7I2V4G8;A0A7I2V579;E5RGW4	P06748	33	45	NPM1	Nucleophosmin	yes	no	2;3	6.698e-137	276.73		1	0	12752000	3312	146	3378	8970;8971;8972	9191;9192;9193	9193			3	0	19000000
VELQELNDR	9	0	1114.56	P08670;V9HWE1;B0YJC4;Q53HU8;B3KRK8;A0A1B0GTT5;A0A384NPX1;P17661;A5Z217;Q45VM7;L7RDA5;Q45VM6;Q53SB5;Q45VM8;B4DUI0;Q9H319;A0A7R6M6U0	P08670	105	113	VIM;HEL113;DES;tmp_locus_29	Vimentin;Desmin	yes	no	2	0.0013727	155.1		1	0	0	3325	518	3391	9007;9008;9009;9010	9229;9230;9231;9232	9230			4	0	0
VEQATKPSFESGRR	14	2	1590.81	H0Y6E7;H3BT71;P38159;B4E352	H0Y6E7	83	96	RBMX	RNA-binding motif protein, X chromosome;RNA-binding motif protein, X chromosome, N-terminally processed	yes	no	3	0.0020874	77.078		1	0	0	3328	479	3394	9018;9019	9240;9241	9241			2	0	0
VEQHVVDGK	9	0	1009.52	Q9Y3I0;B4DNA0	Q9Y3I0	358	366	RTCB	tRNA-splicing ligase RtcB homolog	yes	no	2	0.0005016	169.65		1	0	107930000	3329	687	3395	9020;9021;9022;9023	9242;9243;9244;9245;9246	9245			5	0	160810000
VFEVSLADLQNDEVAFR	17	0	1950.97	Q6NXR8;A8K4W0;P61247;B7Z3M5;H0Y8L7;E9PFI5;D6RG13;D6RAT0;D6RB09;D6RAS7;D6RI02;D6RED7;D6RGE0	Q6NXR8	66	82	RPS3A	40S ribosomal protein S3a	yes	no	3	2.537e-18	166.9		1	0	0	3338	273	3404	9044	9267	9267			1	0	0
VFLMTLKNMISK	12	1	1423.79	A0A087WTG3	A0A087WTG3	20	31	CUL3		yes	yes	3	0.019452	42.556		1	0	0	3343	101	3410	9065	9288	9288	27;28	77;78	1	0	0
VGEFSGANK	9	0	907.44	H9ZYJ2;P10599	H9ZYJ2	86	94	TXN	Thioredoxin	yes	no	2	0.022253	106.36		1	0	0	3351	492	3418	9094	9317	9317			1	0	0
VGGTSDVEVNEK	12	0	1232.59	B7Z597;A0A7I2YQK6;B7Z5E7;A0A7I2V599;A0A7I2V2X6;B7Z4F6;B3GQS7;A0A024R3X4;P10809	B7Z597	397	408	HSPD1	60 kDa heat shock protein, mitochondrial	yes	no	2	0.012976	87.298		1	0	0	3355	380	3422	9098;9099;9100	9321;9322;9323	9322			3	0	0
VGTVIGSNK	9	0	873.492	B2R5W3;A0A024R3T8;P09874;B4E0E1;A0A7I2V3E1	B2R5W3	592	600	PARP1	Poly [ADP-ribose] polymerase 1	yes	no	2	0.0075887	128.61		1	0	0	3372	39	3439	9144;9145	9367;9368	9368			2	0	0
VIDPATATSVDLR	13	0	1356.72	B7Z9L0;B7Z2Z8;A8K3C3;P50991;B7Z2F4	B7Z9L0	138	150	CCT4	T-complex protein 1 subunit delta	yes	no	2	0.0024267	110.86		1	0	0	3385	266	3452	9196;9197;9198;9199	9420;9421;9422;9423	9421			4	0	0
VIQEIVDK	8	0	942.539	P51114;A0A0F7KYT8;A0A0F7L1S3;B4DXZ6;A0A0F7L0Q8;B4DM78;B4DM21;E9PFF5;B4DGH9;E7EU85;P51116	P51116	313	320	FXR1;FXR2	Fragile X mental retardation syndrome-related protein 1;Fragile X mental retardation syndrome-related protein 2	no	no	2	0.0042305	159.2		1	0	0	3396	564;140	3463	9214;9215;9216	9438;9439;9440	9439			3	0	0
VITNFNSAHDTDR	13	0	1488.7	A0A494C0J7;Q08188;B4DQ50	A0A494C0J7	312	324	TGM3	Protein-glutamine gamma-glutamyltransferase E;Protein-glutamine gamma-glutamyltransferase E 50 kDa catalytic chain;Protein-glutamine gamma-glutamyltransferase E 27 kDa non-catalytic chain	yes	no	2;3	0.00034804	110.38		1	0	0	3401	208	3469	9238;9239;9240;9241	9462;9463;9464;9465	9462			4	0	0
VKPLLQVTR	9	1	1052.67	P35580;Q7Z406;M0QY43;B3KWH4	P35580	841	849	MYH10;MYH14	Myosin-10;Myosin-14	no	no	2;3	0.0047007	125.31		1	0	0	3413	547;637	3481	9271;9272;9273;9274	9495;9496;9497;9498	9495			4	0	0
VLIPVKQYPK	10	1	1183.73	B4DDX2;Q07666;B2R7B5;B4E043;A0A6Q8PGH5;B3KTS3;Q5VWX1	B4DDX2	140	149	KHDRBS1;KHDRBS2	KH domain-containing, RNA-binding, signal transduction-associated protein 1;KH domain-containing, RNA-binding, signal transduction-associated protein 2	yes	no	3	0.0050942	85.731		1	0	0	3435	342	3503	9332;9333;9334	9562;9563;9564	9563			3	0	0
VLITTLITAGR	11	0	1156.72	Q9HCE1;Q5JR04;B7Z700;B3KQ43	Q9HCE1	618	628	MOV10	Putative helicase MOV-10	yes	no	2	2.454e-08	177.3		1	0	0	3437	672	3505	9340;9341;9342;9343;9344	9570;9571;9572;9573;9574	9573			5	0	0
VLSIGDGIAR	10	0	999.571	V9HW26;P25705;K7EK77;B4DGW3;K7ERX7;K7EQH4;K7EJP1	V9HW26	74	83	HEL-S-123m;ATP5A1	ATP synthase subunit alpha;ATP synthase subunit alpha, mitochondrial	yes	no	2	0.0057357	122.52		1	0	0	3453	536	3522	9407;9408;9409;9410	9648;9649;9650;9651	9651			4	0	0
VLTVINQTQKENLR	14	1	1654.94	P42766;F2Z388;A0A024R866	P42766	57	70	RPL35	60S ribosomal protein L35	yes	no	3	0.00010515	94.09		1	0	0	3459	553	3528;3529	9440;9441;9442	9681;9682;9683	9681	116		3	0	0
VNFTVDQIR	9	0	1090.58	A0A384N6H1;P13639;B4DPU3;B4DRE8;Q6PK56;B4DMC6	A0A384N6H1	2	10	EEF2	Elongation factor 2	yes	no	2	0.0075887	128.61		1	0	0	3476	197	3548	9490;9491;9492;9493	9732;9733;9734;9735	9733			4	0	0
VNVDEVGGEALGR	13	0	1313.66	P68871;Q0Z944;B3VL05;Q4TWB7;Q14473;Q52MT0;Q8IUL9;Q9BWU5;A0A1B4WRL5;Q9BWV6;A0A2R8Y7R2;Q9GZL9;B3VL86;D9YZU5;C8C504;A0A481SHK9;Q8IZI0;Q3LR79;Q6V0K9;E9NGZ5;Q3Y9I8;Q4TZM4;B3VL12;D5FZW3;A0A2S1CVU8;O95408;Q9BXA2;Q14484;Q9UBV6;J7LKS8;E9M263;B3VL17;B3VL31;A0A140KFU0;A9YUX2;B5ANL9;Q9UP81;F8W6P5;Q9H1I6	P68871	19	31	HBB	Hemoglobin subunit beta;LVV-hemorphin-7;Spinorphin	yes	no	2	0.001211	127.51		1	0	0	3482	164	3554	9516;9517;9518	9758;9759;9760	9760			3	0	0
VPAPFKPITR	10	1	1124.67	Q9NX20;E9PI14	Q9NX20	124	133	MRPL16	39S ribosomal protein L16, mitochondrial	yes	no	3	0.0082518	73.781		1	0	0	3485	676	3557	9521;9522;9523;9524	9763;9764;9765;9766	9766			4	0	0
VPGLQNEQKR	10	1	1167.64	A0A024QZC0;A0A024QZB7;A0A024QZ91;Q8WWM7;H3BUF6	Q8WWM7	530	539	ATXN2L	Ataxin-2-like protein	no	no	2;3	0.00096543	146.81		1	0	0	3488	649;3	3560	9529;9530;9531;9532;9533	9771;9772;9773;9774;9775	9775			5	0	0
VPPAINQFTQALDR	14	0	1568.83	P62424;Q5T8U3	P62424	76	89	RPL7A	60S ribosomal protein L7a	yes	no	2	0.0005659	100.93		1	0	0	3489	579	3561	9534;9535;9536	9776;9777;9778	9776			3	0	0
VQDDEVGDGTTSVTVLAAELLR	22	0	2287.15	F8VQ14;F5GWF6;V9HW96;P78371	F8VQ14	90	111	CCT2;HEL-S-100n	T-complex protein 1 subunit beta	yes	no	3	1.3544e-16	108.08		1	0	0	3500	469	3573	9573	9815	9815			1	0	0
VQLVVGDGR	9	0	941.529	A0A384MDK7;A0A0A0MRJ6;P22061;B7Z972;F6S8N6;A0A3F2YNX8	A0A384MDK7	136	144	PCMT1	Protein-L-isoaspartate O-methyltransferase;Protein-L-isoaspartate(D-aspartate) O-methyltransferase	yes	no	2	3.8196e-07	204.03		1	0	0	3509	120	3582	9588;9589;9590;9591;9592;9593	9830;9831;9832;9833;9834;9835;9836;9837	9835			8	0	0
VQSGNINAAK	10	0	1000.53	B3KX11;Q59H77;P49368;Q2TU64;E9PM09;Q5SZX9;Q5SZW8;E9PRC8;Q5SZX6	B3KX11	22	31	CCT3	T-complex protein 1 subunit gamma	yes	no	2	0.0021176	129.42		1	0	0	3512	335	3585	9601	9845	9845			1	0	0
VSHLLGINVTDFTR	14	0	1570.85	A0A024R1N1;P35579;Q86XU5;B4E3S1	A0A024R1N1	374	387	MYH9	Myosin-9	yes	no	2;3	3.4546e-18	176.51		1	0	0	3534	22	3607	9662;9663;9664;9665	9907;9908;9909;9910	9910			4	0	0
VTISCSGSTSNIGR	14	0	1437.69	A0A5C2GFS5;A0A5C2G1J6;A0A5C2FYN0;A0A5C2FWX2	A0A5C2GFS5	18	31			yes	no	2	0.00068934	115.57		1	0	0	3553	217	3626	9712;9713	9957;9958	9958			2	0	0
VVDALGNAIDGK	12	0	1170.62	V9HW26;P25705;K7EK77;B4DGW3;K7ERX7;K7EQH4;K7EJP1;K7ENJ4	V9HW26	150	161	HEL-S-123m;ATP5A1	ATP synthase subunit alpha;ATP synthase subunit alpha, mitochondrial	yes	no	2	0.0051806	100.88		1	0	0	3562	536	3636	9745	9990	9990			1	0	0
VVFQEFR	7	0	923.486	A0A024R1N1;P35579;Q86XU5;B4E3S1	A0A024R1N1	712	718	MYH9	Myosin-9	no	no	2	0.013965	141.98		1	0	0	3566	22	3640	9756	10001	10001			1	0	0
VVRDPQGIR	9	1	1038.59	B2R4C5;P61626	B2R4C5	117	125	LYZ	Lysozyme;Lysozyme C	yes	no	2	0.002999	141.39		1	0	0	3571	305	3645	9770;9771	10015;10016	10015			2	0	0
VVSSVLQFGNISFK	14	0	1523.83	P35580	P35580	349	362	MYH10	Myosin-10	yes	yes	2	7.6583e-38	210.35		1	0	0	3574	547	3648	9775;9776;9777	10020;10021;10022	10022			3	0	0
YAGHVGSVNSIK	12	0	1230.64	A0A3B3IT47;Q9Y2I8;E7EQ49;A0A087WTQ2;C9JGR9	A0A3B3IT47	195	206	WDR37	WD repeat-containing protein 37	yes	no	2	7.6902e-92	235.01		1	0	68320000	3584	203	3658	9799	10045	10045			1	0	101790000
YDGIILPGK	9	0	974.544	Q5VVD0;P62913;Q5VVC8;Q08ES8	Q5VVD0	170	178	RPL11	60S ribosomal protein L11	yes	no	2	0.012725	98.299		1	0	8016200	3588	584	3662	9806;9807;9808	10052;10053;10054;10055;10056	10052			5	0	11944000
YHQIGSGK	8	0	888.445	A0A087WUK2;A0A024RDB5;O14979;B4DTA2;B4DGN3	A0A087WUK2	295	302	HNRNPDL	Heterogeneous nuclear ribonucleoprotein D-like	yes	no	2	0.016567	132.08		1	0	0	3609	95	3683	9868	10126	10126			1	0	0
YLDLEEEADTTK	12	0	1425.65	A0A024R6M6;A8K5J7;Q9UL15	A0A024R6M6	255	266	BAG5	BAG family molecular chaperone regulator 5	yes	no	2	0.0077114	118.4		1	0	0	3617	53	3691	9880	10138	10138			1	0	0
YSQVLANGLDNK	12	0	1320.67	P62269;J3JS69	P62269	95	106	RPS18	40S ribosomal protein S18	yes	no	2	3.5989e-17	198.25		1	0	0	3637	572	3711	9925;9926;9927;9928	10183;10184;10185;10186	10186			4	0	0
YSVDIPLDK	9	0	1048.54	E4W6B6;B2R4D8;A0A024R1V4;P61353;K7ELC7	E4W6B6	85	93	RPL27	60S ribosomal protein L27	yes	no	2	0.017276	112.84		1	0	0	3639	26	3713	9930;9931;9932;9933	10188;10189;10190;10191	10188			4	0	0

## Sheet: GlyGly (K)Sites
Proteins	Positions within proteins	Leading proteins	Protein	Protein names	Gene names	Fasta headers	Localization prob	Score diff	PEP	Score	Delta score	Score for localization	Localization prob NC	Score diff NC	PEP NC	Score NC	Localization prob WDR37	Score diff WDR37	PEP WDR37	Score WDR37	Diagnostic peak	Number of GlyGly (K)	Amino acid	Sequence window	Modification window	Peptide window coverage	GlyGly (K) Probabilities	GlyGly (K) Score diffs	Position in peptide	Charge	Mass error [ppm]	Intensity NC	Intensity WDR37	id	Protein group IDs	Positions	Position	Peptide IDs	Mod. peptide IDs	Evidence IDs	MS/MS IDs	Best localization evidence ID	Best localization MS/MS ID	Best localization raw file	Best localization scan number	Best score evidence ID	Best score MS/MS ID	Best score raw file	Best score scan number
P62987;L8B196;F5H747;F5GXK7;J3QKN0;Q5U5U6;Q5PY61;Q9UFQ0;Q96C32;Q96MH4;A0A2R8Y422;A0A248RGE3;Q96H31;L8B4R0;A8K674;L8B4M0;L8B4Z6;L8B4J3;Q66K58;B2RDW1;L8B4I8;Q59EM9;J3QS39;Q3MIH3;P0CG47;P0CG48;P62979;F5H6Q2;F5H388;Q5UGI3;B4DV12;M0R1M6;J3QTR3;F5H265;M0R2S1;F5H2Z3;F5GYU3;Q5RKT7;M0R1V7;Q49A90;Q8WYN9;F5GZ39	48;48;48;48;48;48;48;58;48;48;48;37;61;48;48;48;48;48;61;48;48;64;48;48;48;48;48;48;48;48;48;23;48;48;30;48;48;48;48;48;13;48	P62987	P62987	Ubiquitin-60S ribosomal protein L40;Ubiquitin;60S ribosomal protein L40;Polyubiquitin-B;Ubiquitin;Polyubiquitin-C;Ubiquitin;Ubiquitin-40S ribosomal protein S27a;Ubiquitin;40S ribosomal protein S27a	UBA52;UbC;UBC;UBB;DKFZp434K0435;HEL112;RPS27A	sp|P62987|RL40_HUMAN Ubiquitin-60S ribosomal protein L40 OS=Homo sapiens OX=9606 GN=UBA52 PE=1 SV=2;tr|L8B196|L8B196_HUMAN Ubiquitin C OS=Homo sapiens OX=9606 GN=UbC PE=4 SV=1;tr|F5H747|F5H747_HUMAN Polyubiquitin-C (Fragment) OS=Homo sapiens OX=9606 GN=UBC	1	91.9612	0.000822121	106.49	73.297	91.961					1	106.492	0.000822121	106.49		1	K	KEGIPPDQQRLIFAGKQLEDGRTLSDYNIQK	X;X;X;X;X;X;X;X;X;X;X;X;X;X;X;GlyGly (K);X;X;X;X;X;X;X;X;X;X;X;X;X;X;X	XXXXXXXXXXPPPPPPPPPPPPXXXXXXXXX	LIFAGK(1)QLEDGR	LIFAGK(91.96)QLEDGR	6	3	-1.8506	0	0	36	175	48	48	1914	1957	5204;5205;5206	5334;5335;5336	5206	5336	R211017-TRIM34	39616	5204	5334	R211017-WDR37	35815
B4DHY7;B4E1C9;Q53GS5;B2RBI2;Q96A49	126;258;292;292;292	B4DHY7	B4DHY7	Synapse-associated protein 1	SYAP1	tr|B4DHY7|B4DHY7_HUMAN cDNA FLJ60548, highly similar to Synapse-associated protein 1 OS=Homo sapiens OX=9606 PE=2 SV=1;tr|B4E1C9|B4E1C9_HUMAN cDNA FLJ52963, highly similar to Synapse-associated protein 1 OS=Homo sapiens OX=9606 PE=2 SV=1;tr|Q53GS5|Q53GS5_H	1	87.5763	0.0163828	99.802	21.468	99.802					1	87.5763	0.0163828	99.802		1	K	SDAFDACNLNQEDLRKEMEQLVLDKKQEETA	X;X;X;X;X;X;X;X;X;X;X;X;X;X;X;GlyGly (K);X;Oxidation (M);X;X;X;X;X;X;X;X;X;X;X;X;X	XXXXXXXXXXXXXXXPPPPPPPPPPXXXXXX	K(1)EMEQLVLDK	K(87.58)EMEQLVLDK(-87.58)	1	2	-1.0283	0	0	67	315	126	126	1577	1605	4269	4389	4269	4389	R211017-WDR37	40112	4269	4389	R211017-WDR37	40112
B3KX20;B4E3F8;B4E3S9;B4DIX9;P29536	384;400;442;475;493	B3KX20	B3KX20	Leiomodin-1	LMOD1	tr|B3KX20|B3KX20_HUMAN cDNA FLJ44510 fis, clone UTERU3001652, highly similar to Leiomodin-1 OS=Homo sapiens OX=9606 PE=2 SV=1;tr|B4E3F8|B4E3F8_HUMAN cDNA FLJ54257, highly similar to Leiomodin-1 OS=Homo sapiens OX=9606 PE=2 SV=1;tr|B4E3S9|B4E3S9_HUMAN cDNA	1	74.1273	0.0196749	74.127	32.698	74.127					1	74.1273	0.0196749	74.127		1	K	RLQEQRQAQEAKGEKKDLLEVPKAGAVAKGS	X;X;X;X;X;X;X;X;X;X;X;X;X;X;X;GlyGly (K);X;X;X;X;X;X;X;X;X;X;X;X;X;X;X	XXXXXXXXXXXXXXXPPPPPPPPXXXXXXXX	K(1)DLLEVPK	K(74.13)DLLEVPK(-74.13)	1	3	-2.2039	0	0	72	336	384	384	1556	1583	4207	4325	4207	4325	R211017-WDR37	29187	4207	4325	R211017-WDR37	29187
Q68DB0	5	Q68DB0	Q68DB0		DKFZp781H1314	tr|Q68DB0|Q68DB0_HUMAN Uncharacterized protein DKFZp781H1314 (Fragment) OS=Homo sapiens OX=9606 GN=DKFZp781H1314 PE=2 SV=1	1	75.3106	0.00806371	102.98	45.421	75.311					1	66.073	0.0143932	88.734		3	K	___________LLGPKGKAKSYHEIGRAIAT	X;X;X;X;X;X;X;X;X;X;X;X;X;X;X;GlyGly (K);X;GlyGly (K);X;GlyGly (K);X;X;X;X;X;X;X;X;X;X;X	XXXXXXXXXXXPPPPPPPPPXXXXXXXXXXX	LLGPK(1)GK(1)AK(1)	LLGPK(75.31)GK(75.31)AK(75.31)	5	2	-2.3195	0	0	130	627	5	5	1984	2029	5402;5403;5404;5405;5406;5407	5535;5536;5537;5538;5539;5540	5407	5540	R211017-TRIM34	31819	5406	5539	R211017-PIN1	29880
Q68DB0	7	Q68DB0	Q68DB0		DKFZp781H1314	tr|Q68DB0|Q68DB0_HUMAN Uncharacterized protein DKFZp781H1314 (Fragment) OS=Homo sapiens OX=9606 GN=DKFZp781H1314 PE=2 SV=1	1	75.3106	0.00806371	102.98	45.421	75.311					1	66.073	0.0143932	88.734		3	K	_________LLGPKGKAKSYHEIGRAIATLM	X;X;X;X;X;X;X;X;X;X;X;X;X;GlyGly (K);X;GlyGly (K);X;GlyGly (K);X;X;X;X;X;X;X;X;X;X;X;X;X	XXXXXXXXXPPPPPPPPPXXXXXXXXXXXXX	LLGPK(1)GK(1)AK(1)	LLGPK(75.31)GK(75.31)AK(75.31)	7	2	-2.3195	0	0	131	627	7	7	1984	2029	5402;5403;5404;5405;5406;5407	5535;5536;5537;5538;5539;5540	5407	5540	R211017-TRIM34	31819	5406	5539	R211017-PIN1	29880
Q68DB0	9	Q68DB0	Q68DB0		DKFZp781H1314	tr|Q68DB0|Q68DB0_HUMAN Uncharacterized protein DKFZp781H1314 (Fragment) OS=Homo sapiens OX=9606 GN=DKFZp781H1314 PE=2 SV=1	1	75.3106	0.00806371	102.98	45.421	75.311					1	66.073	0.0143932	88.734		3	K	_______LLGPKGKAKSYHEIGRAIATLMSD	X;X;X;X;X;X;X;X;X;X;X;GlyGly (K);X;GlyGly (K);X;GlyGly (K);X;X;X;X;X;X;X;X;X;X;X;X;X;X;X	XXXXXXXPPPPPPPPPXXXXXXXXXXXXXXX	LLGPK(1)GK(1)AK(1)	LLGPK(75.31)GK(75.31)AK(75.31)	9	2	-2.3195	0	0	132	627	9	9	1984	2029	5402;5403;5404;5405;5406;5407	5535;5536;5537;5538;5539;5540	5407	5540	R211017-TRIM34	31819	5406	5539	R211017-PIN1	29880
H0YJE3;G9BAV9;Q6ZU80	436;771;744	H0YJE3	H0YJE3	Centrosomal protein of 128 kDa	CEP128;LEDP/132	tr|H0YJE3|H0YJE3_HUMAN Centrosomal protein of 128 kDa (Fragment) OS=Homo sapiens OX=9606 GN=CEP128 PE=1 SV=1;tr|G9BAV9|G9BAV9_HUMAN Lens epithelium-derived protein OS=Homo sapiens OX=9606 GN=LEDP/132 PE=2 SV=1;sp|Q6ZU80|CE128_HUMAN Centrosomal protein of 1	0.999989	49.6974	0.00212782	78.655	36.445	78.655					0.999989	49.6974	0.00212782	78.655		2	K	AENHIRTLKAESLEEKNMAKIHRGQLEKLKS	X;X;X;X;X;X;X;X;X;X;X;X;X;X;X;GlyGly (K);X;Oxidation (M);X;GlyGly (K);X;X;X;X;X;X;X;X;X;X;X	XXXXXXPPPPPPPPPPPPPPXXXXXXXXXXX	TLKAESLEEK(1)NMAK(1)	TLK(-40.09)AESLEEK(49.7)NMAK(40.09)	10	2	1.5532	0	0	108	477	436	436	3163	3225	8522;8523;8524;8525	8727;8728;8729;8730	8522	8727	R211017-WDR37	28229	8522	8727	R211017-WDR37	28229
A0A087WTG3	26	A0A087WTG3	A0A087WTG3		CUL3	tr|A0A087WTG3|A0A087WTG3_HUMAN Cullin-3 OS=Homo sapiens OX=9606 GN=CUL3 PE=1 SV=1	1	42.5556	0.0194516	42.556	23.232	42.556					1	42.5556	0.0194516	42.556		2	K	WQGDFSQIKVFLMTLKNMISKLKTECGCQFT	X;X;X;X;X;X;X;X;X;X;X;X;Oxidation (M);X;X;GlyGly (K);X;Oxidation (M);X;X;GlyGly (K);X;X;X;X;X;X;X;X;X;X	XXXXXXXXXPPPPPPPPPPPPXXXXXXXXXX	VFLMTLK(1)NMISK(1)	VFLMTLK(42.56)NMISK(42.56)	7	3	-2.8151	0	0	27	101	26	26	3343	3410	9065	9288	9065	9288	R211017-WDR37	36870	9065	9288	R211017-WDR37	36870
A0A087WTG3	31	A0A087WTG3	A0A087WTG3		CUL3	tr|A0A087WTG3|A0A087WTG3_HUMAN Cullin-3 OS=Homo sapiens OX=9606 GN=CUL3 PE=1 SV=1	1	42.5556	0.0194516	42.556	23.232	42.556					1	42.5556	0.0194516	42.556		2	K	SQIKVFLMTLKNMISKLKTECGCQFTSKLEG	X;X;X;X;X;X;X;Oxidation (M);X;X;GlyGly (K);X;Oxidation (M);X;X;GlyGly (K);X;X;X;X;X;X;X;X;X;X;X;X;X;X;X	XXXXPPPPPPPPPPPPXXXXXXXXXXXXXXX	VFLMTLK(1)NMISK(1)	VFLMTLK(42.56)NMISK(42.56)	12	3	-2.8151	0	0	28	101	31	31	3343	3410	9065	9288	9065	9288	R211017-WDR37	36870	9065	9288	R211017-WDR37	36870
H0YJE3;G9BAV9;Q6ZU80	440;775;748	H0YJE3	H0YJE3	Centrosomal protein of 128 kDa	CEP128;LEDP/132	tr|H0YJE3|H0YJE3_HUMAN Centrosomal protein of 128 kDa (Fragment) OS=Homo sapiens OX=9606 GN=CEP128 PE=1 SV=1;tr|G9BAV9|G9BAV9_HUMAN Lens epithelium-derived protein OS=Homo sapiens OX=9606 GN=LEDP/132 PE=2 SV=1;sp|Q6ZU80|CE128_HUMAN Centrosomal protein of 1	0.999902	40.0879	0.00212782	78.655	36.445	78.655					0.999902	40.0879	0.00212782	78.655		2	K	IRTLKAESLEEKNMAKIHRGQLEKLKSQCDR	X;X;X;X;X;X;X;X;X;X;X;GlyGly (K);X;Oxidation (M);X;GlyGly (K);X;X;X;X;X;X;X;X;X;X;X;X;X;X;X	XXPPPPPPPPPPPPPPXXXXXXXXXXXXXXX	TLKAESLEEK(1)NMAK(1)	TLK(-40.09)AESLEEK(49.7)NMAK(40.09)	14	2	1.5532	0	0	109	477	440	440	3163	3225	8522;8523;8524;8525	8727;8728;8729;8730	8522	8727	R211017-WDR37	28229	8522	8727	R211017-WDR37	28229
B4DEJ8;A2A2L6;A2A2L5;B2RB99;B4DXL5;A0A0A0MQR2;Q9BY42	83;83;113;83;113;113;83	B4DEJ8	B4DEJ8	Protein RTF2 homolog	RTFDC1	tr|B4DEJ8|B4DEJ8_HUMAN cDNA FLJ52477 OS=Homo sapiens OX=9606 PE=2 SV=1;tr|A2A2L6|A2A2L6_HUMAN Replication termination factor 2 OS=Homo sapiens OX=9606 GN=RTF2 PE=1 SV=1;tr|A2A2L5|A2A2L5_HUMAN Replication termination factor 2 (Fragment) OS=Homo sapiens OX=9	0.984955	18.1604	0.0278892	44.203	10.407	44.203					0.984955	18.1604	0.0278892	44.203		1	K	DKSAEKALGKAASHIKSIKNVTELKLSDNPA	X;X;X;X;X;X;X;X;X;X;X;X;X;X;X;GlyGly (K);X;X;X;X;X;X;X;X;X;X;X;X;X;X;X	XXXXXXPPPPPPPPPPXXXXXXXXXXXXXXX	ALGK(0.015)AASHIK(0.985)	ALGK(-18.16)AASHIK(18.16)	10	3	-0.38355	0	10253000	29	118	83	83	179	181	457	466	457	466	R211017-WDR37	25346	457	466	R211017-WDR37	25346
[truncated: 4 more columns]
